# Supplementary material for: Decidual Cell Polyploidization Necessitates Mitochondrial Activity
Source: PLoS One. 2011 Oct 25;6(10):e26774. doi: 10.1371/journal.pone.0026774 (PMC3201964; doi:10.1371/journal.pone.0026774)
Supplement: Table S1 — Complete list of up- or down-regulated genes in polyploid (P) cells as compared to non-polyploid (N) cells. (XLS) [file pone.0026774.s007.xls]

## Sheet: Sheet1
Table S1
Complete list of up- or down-regulated genes in polyploid (P) cells as compared to non-polyploid (N) cells
Transcripts Cluster Id	Fold change([P] vs [N])	Regulation([P] vs [N])	Gene Description	genbank	genesymbol	refseq	unigene
10607870	6.10789	Down	toll-like receptor 7	AF334943	Tlr7	NM_133211	Mm.23979///Mm.23979///Mm.23979///Mm.23979///Mm.23979
10607868	6.04937	Down	toll-like receptor 8	AY035890	Tlr8	NM_133212	Mm.196676///Mm.196676///Mm.196676///Mm.196676///Mm.196676
10607865	2.47052	Down	thymosin, beta 4, X chromosome	X16053	Tmsb4x	NM_021278	Mm.142729///Mm.142729///Mm.142729///Mm.142729///Mm.142729///Mm.142729
10607467	2.49521	Down	spermidine/spermine N1-acetyl transferase 1	BC058696	Sat1	NM_009121	Mm.2734///Mm.2734///Mm.2734///Mm.2734
10607403	3.79722	Down	potassium channel tetramerisation domain containing 12b	BC064459	Kctd12b	NM_175429	Mm.271572///Mm.271572///Mm.271572///Mm.271572
10606714	3.34235	Down	galactosidase, alpha	U34071	Gla	NM_013463	Mm.1114///Mm.1114///Mm.1114
10606694	3.53066	Down	Bruton agammaglobulinemia tyrosine kinase	BC053392	Btk	NM_013482	Mm.4475///Mm.4475///Mm.4475///Mm.4475///Mm.4475
10606600	2.00405	Down	protocadherin 19	BC118529	Pcdh19	NM_001105245|NM_001105246	Mm.39738///Mm.39738///Mm.39738///Mm.39738///Mm.39738
10606355	4.7904	Down	cysteinyl leukotriene receptor 1	BC027102	Cysltr1	NM_021476	Mm.287166///Mm.287166///Mm.287166///Mm.287166
10606016	6.98593	Down	interleukin 2 receptor, gamma chain	L20048	Il2rg	NM_013563	Mm.2923///Mm.2923///Mm.2923
10605571	2.48112	Down	glycerol kinase	BC003767	Gyk	NM_212444|NM_008194	Mm.246682///Mm.246682///Mm.246682///Mm.246682///Mm.246682///Mm.246682///Mm.246682
10605465	2.38235	Down	protein kinase, X-linked	BC006875	Prkx	NM_016979	Mm.290338///Mm.290338///Mm.290338///Mm.290338
10605143	5.28365	Down	Rho GTPase activating protein 4	AY183126	Arhgap4	NM_138630	Mm.246654///Mm.246654///Mm.246654///Mm.246654///Mm.246654///Mm.246654///Mm.246654///Mm.246654///Mm.246654
10605113	2.31768	Down	L1 cell adhesion molecule	BC056988	L1cam	NM_008478	Mm.260568///Mm.260568///Mm.260568///Mm.260568///Mm.260568///Mm.260568///Mm.260568///Mm.260568///Mm.260568
10604713	2.9275	Down	Rac/Cdc42 guanine nucleotide exchange factor (GEF) 6	AF393831	Arhgef6	NM_152801	Mm.261443///Mm.261443///Mm.261443///Mm.261443///Mm.261443
10604637	2.40112	Down	CAAX box 1 homolog B (human) | CAAX box 1 homolog A (human) | similar to mammalian retrotransposon derived 8b	BC029838|BC003436	Cxx1b|Cxx1a|LOC100044569	NM_001018063|NM_024170	Mm.328602///Mm.391252///Mm.328602///Mm.391252///Mm.328602///Mm.391252///Mm.328602///Mm.391252
10604633	2.44073	Down	CAAX box 1 homolog B (human) | CAAX box 1 homolog A (human) | similar to mammalian retrotransposon derived 8b	BC029838|BC003436	Cxx1b|Cxx1a|LOC100044569	NM_001018063|NM_024170	Mm.328602///Mm.391252///Mm.328602///Mm.391252///Mm.328602///Mm.391252///Mm.328602///Mm.391252
10604375	2.15319	Down	apelin	DQ832282	Apln	NM_013912	Mm.29262///Mm.29262///Mm.29262
10603860	4.16856	Down	complement factor properdin	BC132369	Cfp	NM_008823	Mm.3064///Mm.3064///Mm.3064
10603796	2.25099	Down	RIKEN cDNA 4930578C19 gene	BC118515	4930578C19Rik	NM_175228	Mm.159617///Mm.159617///Mm.159617
10603551	20.5524	Down	cytochrome b-245, beta polypeptide	BC071229	Cybb	NM_007807	Mm.200362///Mm.200362///Mm.200362
10603440	2.36414	Down	Wiskott-Aldrich syndrome homolog (human)	U29673	Was	NM_009515	Mm.4735///Mm.4735///Mm.4735
10603051	2.70394	Down	adaptor-related protein complex 1, sigma 2 subunit	BC046964	Ap1s2	NM_026887	Mm.426783///Mm.426783///Mm.426783///Mm.426783///Mm.426783
10602865	2.89464	Down	mitogen-activated protein kinase kinase kinase 15		Map3k15
10602180	2.43995	Down	transmembrane protein 164	BC056470	Tmem164	NM_177592	Mm.249648///Mm.249648///Mm.249648///Mm.249648///Mm.249648///Mm.249648///Mm.249648
10601616	2.33824	Down	diaphanous homolog 2 (Drosophila)	AY312280	Diap2	NM_017398	Mm.10763///Mm.10763///Mm.10763///Mm.10763///Mm.10763///Mm.10763
10601519	3.25252	Down	kelch-like 4 (Drosophila)	BC099954	Klhl4	NM_172781	Mm.132583///Mm.132583///Mm.132583///Mm.132583///Mm.132583
10601456	10.0753	Down			EG622976	NM_001037917	Mm.426133///Mm.426133
10601421	6.12755	Down	RIKEN cDNA A630033H20 gene		A630033H20Rik	NM_175442|NM_001122596|NM_001122595	Mm.265244///Mm.265244///Mm.265244///Mm.265244
10601385	10.131	Down	toll-like receptor 13	AY510706	Tlr13	NM_205820	Mm.336203///Mm.336203///Mm.336203
10600852	7.64223	Down
10600836	2.60086	Down	moesin	BC047366	Msn	NM_010833	Mm.138876///Mm.138876///Mm.138876
10599487	2.41148	Down	SAM and SH3 domain containing 3	BC064734	Sash3	NM_028773	Mm.276131///Mm.276131///Mm.276131
10599174	4.50638	Down	interleukin 13 receptor, alpha 1	BC052425	Il13ra1	NM_133990	Mm.24208///Mm.24208///Mm.24208
10599120	4.19369	Down	dedicator of cytokinesis 11	AB116935	Dock11	NM_001009947	Mm.32873///Mm.32873///Mm.32873///Mm.32873///Mm.32873
10598240	2.33703	Down	shroom family member 4	DQ435687	Shroom4	NM_001040459	Mm.23208///Mm.23208///Mm.23208///Mm.23208
10598093	3.20422	Down	RIKEN cDNA 9930022N03 gene		9930022N03Rik	NM_177363	Mm.245747///Mm.245747
10598013	4.64963	Down	chemokine (C-C motif) receptor 5	D83648	Ccr5	NM_009917	Mm.14302///Mm.14302///Mm.14302
10598004	12.6344	Down	chemokine (C-C motif) receptor 1	BC011092	Ccr1	NM_009912	Mm.274927///Mm.274927///Mm.274927
10597743	4.79697	Down	chemokine (C-X3-C) receptor 1	BC012653	Cx3cr1	NM_009987	Mm.44065///Mm.44065
10597648	2.56885	Down	myeloid differentiation primary response gene 88	BC051075	Myd88	NM_010851	Mm.213003///Mm.213003///Mm.213003
10597279	14.0323	Down	chemokine (C-C motif) receptor-like 2	AF030185	Ccrl2	NM_017466	Mm.7336///Mm.7336///Mm.7336///Mm.7336
10596960	2.23331	Down	three prime repair exonuclease 1	AF319574	Trex1	NM_001012236|NM_011637	Mm.439964///Mm.439964///Mm.439964///Mm.439964///Mm.439964///Mm.439964
10596747	2.82561	Down	sema domain, immunoglobulin domain (Ig), short basic domain, secreted, (semaphorin) 3F	BC010976	Sema3f	NM_011349	Mm.12903///Mm.12903///Mm.12903///Mm.12903
10596637	2.33622	Down	mitogen-activated protein kinase-activated protein kinase 3	BC031467	Mapkapk3	NM_178907	Mm.222612///Mm.222612///Mm.222612///Mm.222612
10596148	7.20427	Down	transferrin	BC092046	Trf	NM_133977	Mm.37214///Mm.37214///Mm.37214///Mm.37214
10595718	2.29581	Down	carbohydrate sulfotransferase 2	BC051963	Chst2	NM_018763	Mm.212446///Mm.212446///Mm.212446
10595633	6.21755	Down	B-cell leukemia/lymphoma 2 related protein A1b | B-cell leukemia/lymphoma 2 related protein A1d | B-cell leukemia/lymphoma 2 related protein A1a | B-cell leukemia/lymphoma 2 related protein A1c	BC116240|BC100462|BC028762|BC120720	Bcl2a1b|Bcl2a1d|Bcl2a1a|Bcl2a1c	NM_007534|NM_007536|NM_009742|NM_007535	Mm.196770///Mm.378888///Mm.425593///Mm.378887///Mm.378888///Mm.196770///Mm.425593///Mm.378887///Mm.378888///Mm.196770///Mm.425593///Mm.378887
10595404	3.98023	Down			BC023892	XM_994662	Mm.74610///Mm.74610
10595402	4.01484	Down			BC023892
10594645	2.75551	Down	RAB8B, member RAS oncogene family	BC059208	Rab8b	NM_173413	Mm.260376///Mm.260376///Mm.260376///Mm.260376
10594540	3.0738	Down	pleckstrin homology domain containing, family O member 2	BC028908	Plekho2	NM_153119	Mm.247303///Mm.247303///Mm.247303
10593856	2.15361	Down	RIKEN cDNA C230081A13 gene		C230081A13Rik	NM_172924	Mm.268105///Mm.268105
10593671	2.23432	Down	Dmx-like 2	AK173043	Dmxl2		Mm.93636///Mm.93636///Mm.93636
10593213	2.16418	Down	RNA binding motif protein 7	AF458961	Rbm7	NM_144948	Mm.76911///Mm.76911///Mm.76911
10593050	10.7663	Down	interleukin 10 receptor, alpha	L12120	Il10ra	NM_008348	Mm.379327///Mm.379327///Mm.379327
10592734	2.15968	Down	Casitas B-lineage lymphoma	BC125285	Cbl	NM_007619	Mm.266871///Mm.266871///Mm.266871
10592535	8.18705	Down	sortilin-related receptor, LDLR class A repeats-containing	AB015790	Sorl1	NM_011436	Mm.121920///Mm.121920///Mm.121920
10592067	3.68169	Down	Friend leukemia integration 1	X59421	Fli1	NM_008026	Mm.258908///Mm.258908///Mm.258908
10592023	2.00768	Down	amyloid beta (A4) precursor-like protein 2	BC051999	Aplp2	NM_001102455|NM_001102456|NM_009691	Mm.19133///Mm.19133///Mm.19133///Mm.19133///Mm.19133///Mm.19133///Mm.19133
10591739	2.41445	Down	acid phosphatase 5, tartrate resistant	BC019160	Acp5	NM_001102404|NM_007388|NM_001102405	Mm.46354///Mm.46354///Mm.46354///Mm.46354///Mm.46354///Mm.46354
10591494	2.30816	Down	endothelial differentiation, sphingolipid G-protein-coupled receptor, 8	BC012232	Edg8	NM_053190	Mm.190619///Mm.190619///Mm.190619
10590909	2.09984	Down	endonuclease domain containing 1	BC096490	Endod1	NM_028013	Mm.41423///Mm.41423///Mm.41423
10590801	4.82748	Down	baculoviral IAP repeat-containing 3	U88908	Birc3	NM_007464	Mm.2026///Mm.2026///Mm.2026///Mm.2026///Mm.2026///Mm.2026
10590635	4.64796	Down	chemokine (C-C motif) receptor 5	D83648	Ccr5	NM_009917	Mm.14302///Mm.14302///Mm.14302
10590631	18.1985	Down	chemokine (C-C motif) receptor 2	U56819	Ccr2	NM_009915	Mm.6272///Mm.6272///Mm.6272
10590445	2.72181	Down	SNF related kinase	AF387809	Snrk	NM_133741	Mm.257989///Mm.257989///Mm.257989
10589884	3.76848	Down	B-cell leukemia/lymphoma 2 related protein A1c	BC120720	Bcl2a1c	NM_007535	Mm.378887///Mm.378887///Mm.378887
10589350	2.12147	Down	shisa homolog 5 (Xenopus laevis)	BC010238	Shisa5	NM_025858|NM_026381	Mm.196533///Mm.196533///Mm.196533///Mm.196533///Mm.196533///Mm.196533
10588899	2.03674	Down	glutathione peroxidase 1	BC086649	Gpx1	NM_008160	Mm.1090///Mm.1090///Mm.1090
10588479	3.34021	Down	toll-like receptor 9	AB045181	Tlr9	NM_031178	Mm.44889///Mm.44889///Mm.44889
10587854	2.71852	Down	solute carrier family 9 (sodium/hydrogen exchanger), member 9	BC099942	Slc9a9	NM_177909	Mm.326125///Mm.326125///Mm.326125
10587799	3.06188	Down	phospholipid scramblase 2	BC011299	Plscr2	NM_008880	Mm.10306///Mm.10306///Mm.10306
10587733	7.44998	Down	cathepsin H	U06119	Ctsh	NM_007801	Mm.2277///Mm.2277///Mm.2277
10587690	5.78554	Down	B-cell leukemia/lymphoma 2 related protein A1b | B-cell leukemia/lymphoma 2 related protein A1d | B-cell leukemia/lymphoma 2 related protein A1a | B-cell leukemia/lymphoma 2 related protein A1c	BC100462|BC116240|BC028762|BC120720	Bcl2a1b|Bcl2a1d|Bcl2a1a|Bcl2a1c	NM_007534|NM_007536|NM_009742|NM_007535	Mm.196770///Mm.378888///Mm.425593///Mm.378887///Mm.196770///Mm.378888///Mm.425593///Mm.378887///Mm.196770///Mm.378888///Mm.425593///Mm.378887
10587683	6.39164	Down	B-cell leukemia/lymphoma 2 related protein A1b | B-cell leukemia/lymphoma 2 related protein A1a | B-cell leukemia/lymphoma 2 related protein A1d | B-cell leukemia/lymphoma 2 related protein A1c	BC116240|BC028762|BC100462|BC120720	Bcl2a1b|Bcl2a1a|Bcl2a1d|Bcl2a1c	NM_007534|NM_009742|NM_007536|NM_007535	Mm.196770///Mm.425593///Mm.378888///Mm.378887///Mm.425593///Mm.378888///Mm.196770///Mm.378887///Mm.378888///Mm.425593///Mm.196770///Mm.378887
10587383	2.64303	Down	CD109 antigen	DQ832284	Cd109	NM_153098	Mm.32955///Mm.32955///Mm.32955
10587023	3.7795	Down	RAB27A, member RAS oncogene family	AF304376	Rab27a	NM_023635	Mm.34867///Mm.34867///Mm.34867
10587012	2.3399	Down	cell cycle progression 1	BC043049	Ccpg1	NM_001114328|NM_028181	Mm.268475///Mm.268475///Mm.268475///Mm.268475///Mm.268475
10586616	2.2432	Down	vacuolar protein sorting 13C (yeast)	AB281675	Vps13c	NM_177184	Mm.241454///Mm.241454///Mm.241454///Mm.241454///Mm.241454///Mm.241454///Mm.241454///Mm.241454
10586254	2.08569	Down	DENN/MADD domain containing 4A		Dennd4a
10586242	2.32714	Down	DENN/MADD domain containing 4A		Dennd4a	XM_001476259
10586240	2.22323	Down	DENN/MADD domain containing 4A		Dennd4a	XM_001476259
10586227	2.21685	Down	RIKEN cDNA F730015K02 gene		F730015K02Rik
10586017	2.68249	Down	uveal autoantigen with coiled-coil domains and ankyrin repeats	AB030647	Uaca	NM_028283	Mm.68819///Mm.68819///Mm.68819///Mm.68819
10585778	3.73127	Down	sema domain, immunoglobulin domain (Ig), and GPI membrane anchor, (semaphorin) 7A	BC057875	Sema7a	NM_011352	Mm.335187///Mm.335187///Mm.335187
10585555	2.12586	Down	proline-serine-threonine phosphatase-interacting protein 1	BC096761	Pstpip1	NM_011193	Mm.2534///Mm.2534///Mm.2534
10584841	4.97957	Down	adhesion molecule, interacts with CXADR antigen 1	AY093688	Amica1	NM_001005421	Mm.190461///Mm.190461///Mm.190461
10584674	3.4764	Down	melanoma cell adhesion molecule	BC026985	Mcam	NM_023061	Mm.275003///Mm.275003///Mm.275003///Mm.275003
10584317	3.56359	Down	endothelial cell-specific adhesion molecule	AF361882	Esam1	NM_027102	Mm.41751///Mm.41751///Mm.41751
10584288	4.26965	Down	roundabout homolog 4 (Drosophila)	AF536772	Robo4	NM_028783	Mm.293315///Mm.293315///Mm.293315///Mm.293315///Mm.293315///Mm.293315
10584142	3.13257	Down	E26 avian leukemia oncogene 1, 5' domain	BC010588	Ets1	NM_011808|NM_001038642	Mm.292415///Mm.292415///Mm.292415///Mm.292415///Mm.292415///Mm.292415
10583669	7.9122	Down		AB124611|AB124612	AB124611		Mm.325205///Mm.325205///Mm.325205///Mm.325205
10582997	2.84721	Down	caspase 4, apoptosis-related cysteine peptidase | hypothetical protein LOC100044206	BC061255	Casp4|LOC100044206	NM_007609	Mm.1569///Mm.1569///Mm.1569
10582985	2.98962	Down	caspase 1 | hypothetical protein LOC100044207	BC008152	Casp1|LOC100044207	NM_009807	Mm.1051///Mm.1051///Mm.1051
10582916	5.90518	Down
10582888	9.87818	Down
10582882	5.13483	Down
10582879	4.57266	Down	component of Sp100-rs	BC071209	Csprs	NM_033616	Mm.362644///Mm.440912///Mm.441375///Mm.362644///Mm.440912///Mm.441375///Mm.362644///Mm.440912///Mm.441375
10582868	4.11321	Down
10582862	5.73349	Down		BC069971	Sp140	NM_001013817	Mm.445821///Mm.445821///Mm.445821
10582580	2.41247	Down
10582562	3.68557	Down
10582429	3.0178	Down	core-binding factor, runt domain, alpha subunit 2, translocated to, 3 (human)	AF038029	Cbfa2t3	NM_009824|NM_001109873|NM_177289	Mm.194339///Mm.194339///Mm.194339///Mm.194339///Mm.194339///Mm.194339
10582162	2.43637	Down	coactosin-like 1 (Dictyostelium)	BC010249	Cotl1	NM_028071	Mm.473725///Mm.473725///Mm.473725
10581605	15.557	Down	haptoglobin	M96827	Hp	NM_017370	Mm.26730///Mm.26730///Mm.26730///Mm.26730
10581197	2.27997	Down	exocyst complex component 3-like	BC094238	Exoc3l	NM_177788	Mm.40228///Mm.40228///Mm.40228
10580504	2.6901	Down	sorting nexin 20	BC039809	Snx20	NM_027840	Mm.270607///Mm.270607///Mm.270607
10580139	2.47269	Down	zinc finger, SWIM domain containing 4	BC058080	Zswim4	NM_172503	Mm.117094///Mm.117094///Mm.117094
10580033	5.82365	Down	CD97 antigen	BC006676	Cd97	NM_011925	Mm.334648///Mm.334648///Mm.334648///Mm.334648///Mm.334648
10580010	2.24384	Down	protein kinase N1	BC052923	Pkn1	NM_177262	Mm.213000///Mm.213000///Mm.213000///Mm.213000///Mm.213000///Mm.213000
10579872	7.76325	Down	tumor protein D52	BC004068	Tpd52	NM_001025264|NM_009412	Mm.371590///Mm.371590///Mm.371590///Mm.371590
10579860	2.59822	Down	MAD homolog 1 (Drosophila)	BC058693	Smad1	NM_008539	Mm.223717///Mm.223717///Mm.223717///Mm.223717///Mm.223717
10579636	9.56198	Down	cytochrome P450, family 4, subfamily f, polypeptide 18	AF233647	Cyp4f18	NM_024444	Mm.160020///Mm.160020///Mm.160020
10579525	4.75937	Down	plasmalemma vesicle associated protein	BC013517	Plvap	NM_032398	Mm.260768///Mm.260768///Mm.260768
10579486	2.4178	Down	Usher syndrome 1C binding protein 1	BC026453	Ushbp1	NM_181418	Mm.34874///Mm.34874///Mm.34874
10579012	2.47692	Down	chondroitin sulfate N-acetylgalactosaminyltransferase 1	BC089162	Csgalnact1	NM_172753	Mm.334569///Mm.334569///Mm.334569///Mm.334569
10578763	2.38895	Down	sin3 associated polypeptide	AF075136	Sap30	NM_021788	Mm.118///Mm.118///Mm.118
10578264	4.82725	Down	macrophage scavenger receptor 1	L04274	Msr1	NM_031195|NM_001113326	Mm.239291///Mm.239291///Mm.239291///Mm.239291///Mm.239291
10578222	2.94554	Down	deleted in liver cancer 1 | RIKEN cDNA A730069N07 gene	AF178078	Dlc1|A730069N07Rik	NM_015802	Mm.210875///Mm.210875///Mm.210875///Mm.210875///Mm.125155
10578123	2.15751	Down	RNA binding protein gene with multiple splicing	BC030397	Rbpms	NM_019733|NM_001042674|NM_001042675	Mm.323997///Mm.323997///Mm.323997///Mm.323997///Mm.323997///Mm.323997///Mm.323997
10577954	2.41879	Down	RAB11 family interacting protein 1 (class I)	BC125400	Rab11fip1	NM_001080813	Mm.205335///Mm.205335///Mm.205335///Mm.205335
10577190	4.29247	Down	RAS p21 protein activator 3	BC057300	Rasa3	NM_009025	Mm.18517///Mm.18517///Mm.18517
10576973	2.77862	Down	collagen, type IV, alpha 1	BC072650	Col4a1	NM_009931	Mm.738///Mm.738///Mm.738
10576784	12.7145	Down	CD209a antigen	AF373408	Cd209a	NM_133238	Mm.32510///Mm.32510///Mm.32510///Mm.32510
10576696	2.9714	Down	insulin receptor	J05149	Insr	NM_010568	Mm.268003///Mm.268003///Mm.268003
10576692	3.17388	Down	insulin receptor		Insr	NM_010568	Mm.268003///Mm.268003
10575993	2.42615	Down	RIKEN cDNA 6430548M08 gene	BC027126|AK122299	6430548M08Rik		Mm.101958///Mm.101958///Mm.101958///Mm.101958///Mm.101958///Mm.101958
10575844	2.31828	Down	cadherin 13	BC021628	Cdh13	NM_019707	Mm.334841///Mm.334841///Mm.334841///Mm.334841
10575799	4.78086	Down	phospholipase C, gamma 2	BC023877	Plcg2	NM_172285	Mm.192699///Mm.192699///Mm.192699
10574545	5.25109	Down	carboxylesterase 5	BC055062	Ces5	NM_172759	Mm.441134///Mm.441134///Mm.441134///Mm.441134
10574532	2.12963	Down	carboxylesterase 2	BC015290	Ces2	NM_145603	Mm.28191///Mm.28191///Mm.28191
10574438	3.33984	Down	cadherin 5	BC054790	Cdh5	NM_009868	Mm.21767///Mm.21767///Mm.21767
10574350	3.00486	Down	matrix metallopeptidase 15	BC047278	Mmp15	NM_008609	Mm.217116///Mm.217116///Mm.217116
10574259	2.22642	Down	G protein-coupled receptor 56	AF166382	Gpr56	NM_018882	Mm.290834///Mm.290834///Mm.290834
10574246	6.10803	Down	G protein-coupled receptor 114	BC145803	Gpr114	NM_001033468	Mm.334726///Mm.334726///Mm.334726
10574163	2.21256	Down			AI451557
10574159	2.92648	Down
10574157	4.85504	Down
10574151	2.91819	Down
10574149	7.17834	Down
10574141	2.09423	Down
10574139	2.50387	Down
10574137	3.05737	Down
10574104	4.05699	Down	NLR family, CARD domain containing 5	AK220210	Nlrc5		Mm.334720///Mm.334720
10574102	4.67946	Down
10574098	4.40221	Down
10573939	3.9431	Down	lysophosphatidylcholine acyltransferase 2	AB244716	Lpcat2	NM_173014	Mm.21463///Mm.21463///Mm.21463
10573790	2.18666	Down	nucleotide-binding oligomerization domain containing 2	AY160221	Nod2	NM_145857	Mm.222633///Mm.222633///Mm.222633///Mm.222633
10573747	3.83198	Down	adenylate cyclase 7	U12919	Adcy7	NM_007406|NM_001037723|NM_001037724|NM_001109756	Mm.288206///Mm.288206///Mm.288206///Mm.288206///Mm.288206///Mm.288206
10573583	2.87489	Down	mannosidase 2, alpha B1	U29947	Man2b1	NM_010764	Mm.4219///Mm.4219///Mm.4219
10573419	3.17767	Down	lymphoblastomic leukemia	BC005736	Lyl1	NM_008535	Mm.4925///Mm.4925///Mm.4925
10573128	2.64708	Down	TBC1 domain family, member 9	BC057027	Tbc1d9	NM_001111304|NM_027758	Mm.24031///Mm.24031///Mm.24031///Mm.24031///Mm.24031
10572800	2.35095	Down	Kruppel-like factor 2 (lung)	U25096	Klf2	NM_008452	Mm.26938///Mm.26938///Mm.26938
10572693	2.01104	Down	insulin-like 3 | Janus kinase 3	BC105577|BC049540	Insl3|Jak3	NM_013564|NM_010589	Mm.440632///Mm.249645///Mm.249645///Mm.249645///Mm.249645///Mm.440632///Mm.249645///Mm.440632
10572445	5.04305	Down	leucine rich repeat containing 25		Lrrc25	NM_153074	Mm.132939///Mm.132939
10572130	2.12754	Down	lipoprotein lipase	BC003305	Lpl	NM_008509	Mm.1514///Mm.1514///Mm.1514
10572050	2.16528	Down	membrane-associated ring finger (C3HC4) 1	BC066008	2010-03-01	NM_175188	Mm.380457///Mm.380457///Mm.380457///Mm.380457///Mm.380457///Mm.380457///Mm.380457///Mm.380457///Mm.380457
10571984	2.75004	Down	DEAD (Asp-Glu-Ala-Asp) box polypeptide 60	BC013672	Ddx60	NM_001081215	Mm.275233///Mm.275233///Mm.275233///Mm.275233
10571840	3.1484	Down	hydroxyprostaglandin dehydrogenase 15 (NAD)	BC021157	Hpgd	NM_008278	Mm.18832///Mm.18832///Mm.18832
10571705	3.45556	Down	interferon regulatory factor 2	J03168	Irf2	NM_008391	Mm.1149///Mm.1149///Mm.1149
10570786	2.13154	Down	thrombospondin, type I, domain 1	AB039946	Thsd1	NM_019576	Mm.32067///Mm.32067///Mm.32067
10570388	2.89178	Down	gene model 687, (NCBI)	BC089620|BC042836	Gm687		Mm.250502///Mm.250502///Mm.250502
10570291	10.1602	Down	coagulation factor X	BC003877	F10	NM_007972	Mm.262589///Mm.262589///Mm.262589///Mm.262589
10570144	2.16081	Down	Rho guanine nucleotide exchange factor (GEF7)	BC044838	Arhgef7	NM_001113518|NM_017402|NM_001113517	Mm.244068///Mm.244068///Mm.244068///Mm.244068///Mm.244068///Mm.244068///Mm.244068///Mm.244068///Mm.244068///Mm.244068///Mm.244068
10570068	2.8624	Down	collagen, type IV, alpha 2	J04695	Col4a2	NM_009932	Mm.181021///Mm.181021///Mm.181021
10569877	15.5369	Down	RIKEN cDNA 1810033B17 gene		1810033B17Rik	NM_026985	Mm.175176///Mm.175176
10569719	2.13226	Down	RIKEN cDNA A430078G23 gene		A430078G23Rik	NM_001033378	Mm.234565///Mm.234565
10569646	3.13132	Down	cyclin D1	BC044841	Ccnd1	NM_007631	Mm.273049///Mm.273049///Mm.273049
10569102	2.6799	Down	interferon regulatory factor 7	U73037	Irf7	NM_016850	Mm.3233///Mm.3233///Mm.3233///Mm.3233
10569020	17.9095	Down	interferon induced transmembrane protein 6	BC104338	Ifitm6	NM_001033632	Mm.276440///Mm.276440///Mm.276440
10569017	2.04983	Down	interferon induced transmembrane protein 3	BC010291	Ifitm3	NM_025378	Mm.141021///Mm.141021///Mm.141021
10568873	3.22479	Down	a disintegrin and metallopeptidase domain 8	BC025584	Adam8	NM_007403	Mm.15969///Mm.15969///Mm.15969///Mm.15969///Mm.15969
10568553	2.89947	Down	RIKEN cDNA 4631426J05 gene	AK122324	4631426J05Rik	NM_029935	Mm.213582///Mm.213582///Mm.213582///Mm.213582
10568392	2.45437	Down	regulator of G-protein signalling 10	BC109178	Rgs10	NM_026418	Mm.18635///Mm.18635///Mm.18635
10568174	2.02923	Down	sialophorin	BC100741	Spn	NM_009259|NM_001037810	Mm.283714///Mm.283714///Mm.283714///Mm.283714
10568024	8.63598	Down	coronin, actin binding protein 1A	AF143955	Coro1a	NM_009898	Mm.290482///Mm.290482///Mm.290482///Mm.290482
10567995	2.43409	Down	nuclear protein 1	BC002109	Nupr1	NM_019738	Mm.18742///Mm.18742///Mm.18742
10567964	2.58025	Down	ceroid lipofuscinosis, neuronal 3, juvenile (Batten, Spielmeyer-Vogt disease)	BC058753	Cln3	NM_009907	Mm.268930///Mm.268930///Mm.268930///Mm.268930///Mm.268930///Mm.268930///Mm.268930
10567580	12.9559	Down	immunoglobulin superfamily, member 6	BC057951	Igsf6	NM_030691	Mm.160384///Mm.160384///Mm.160384
10566585	4.44944	Down	gene model 1966, (NCBI)		Gm1966
10566583	10.1131	Down		AK172683	EG668139	XR_035350	Mm.300542///Mm.300542
10566578	4.28599	Down		BC030868	EG668108		Mm.429088///Mm.429088
10566574	4.31941	Down	GTPase, very large interferon inducible 1	AY167974	Gvin1	NM_029000	Mm.458429///Mm.458429
10566571	3.67961	Down		BC030868	EG668108		Mm.429088///Mm.429088
10566543	2.21532	Down	dachsous 1 (Drosophila)	BC060096	Dchs1		Mm.334108///Mm.334108
10566366	6.27197	Down		BC056631	AI451617	NM_199146	Mm.277377///Mm.277377///Mm.277377///Mm.277377///Mm.277377
10566358	10.0955	Down	tripartite motif-containing 30	BC005447	Trim30	NM_009099	Mm.295578///Mm.295578///Mm.295578
10566132	2.85163	Down	ras homolog gene family, member G	BC059775	Rhog	NM_019566	Mm.259795///Mm.259795///Mm.259795///Mm.259795
10565958	2.43623	Down	pyrimidinergic receptor P2Y, G-protein coupled, 6	BC027331	P2ry6	NM_183168	Mm.235193///Mm.235193///Mm.235193
10565924	2.33779	Down	RELT tumor necrosis factor receptor	BC100310	Relt	NM_177073	Mm.40336///Mm.40336///Mm.40336
10565819	2.54766	Down	solute carrier organic anion transporter family, member 2b1	BC019209	Slco2b1	NM_175316	Mm.11249///Mm.11249///Mm.11249///Mm.11249///Mm.11249
10564938	3.45625	Down	feline sarcoma oncogene	BC129919	Fes	NM_010194	Mm.48757///Mm.48757///Mm.48757///Mm.48757
10563715	8.3234	Down	MAS-related GPR, member A2 | MAS-related GPR, member A5 | similar to Mrgpra2 protein	AY042192	Mrgpra2|Mrgpra5|LOC668727	NM_153101|NM_207534	Mm.425459///Mm.431311///Mm.425459///Mm.431311///Mm.425459///Mm.431311
10563712	9.71839	Down	MAS-related GPR, member A2 | similar to Mrgpra2 protein	BC064040	Mrgpra2|LOC668727	NM_153101	Mm.425459///Mm.431311///Mm.425459///Mm.431311///Mm.425459///Mm.431311
10563641	3.08478	Down	RAS-related protein-1a	BC083128	Rap1a	NM_145541	Mm.458171///Mm.458171///Mm.458171
10563178	3.45663	Down	CD37 antigen	BC019402	Cd37	NM_007645	Mm.3689///Mm.3689///Mm.3689///Mm.3689///Mm.3689
10562720	4.35381	Down	sialic acid binding Ig-like lectin E	AY371487	Siglece	NM_031181	Mm.157702///Mm.157702///Mm.157702
10562709	6.84427	Down	CD33 antigen	BC132379	Cd33	NM_001111058|NM_021293	Mm.140157///Mm.140157///Mm.140157///Mm.140157///Mm.140157
10562192	4.32233	Down	FXYD domain-containing ion transport regulator 5	BC031112	Fxyd5	NM_008761|NM_001111073	Mm.1870///Mm.1870///Mm.1870///Mm.1870
10561702	2.30152	Down	potassium inwardly-rectifying channel, subfamily K, member 6	BC115915	Kcnk6	NM_001033525	Mm.24877///Mm.24877///Mm.24877
10561031	2.09544	Down	lipase, hormone sensitive | RIKEN cDNA 4933403G17 gene	U08188	Lipe|4933403G17Rik	NM_010719|NM_001039507	Mm.333679///Mm.333679///Mm.333679///Mm.333679///Mm.333679///Mm.333679
10561008	2.53345	Down	CEA-related cell adhesion molecule 1	M77196|AB236330|AB236331|AB236332	Ceacam1	NM_001039185|NM_001039186|NM_011926|NM_001039187	Mm.322502///Mm.322502///Mm.322502///Mm.322502///Mm.322502///Mm.322502///Mm.322502///Mm.322502///Mm.322502///Mm.322502///Mm.322502///Mm.322502
10560964	2.50878	Down	POU domain, class 2, transcription factor 2	AY746974	Pou2f2	NM_011138	Mm.208700///Mm.208700///Mm.208700///Mm.208700///Mm.208700///Mm.208700///Mm.208700///Mm.208700///Mm.208700///Mm.208700
10560919	2.76196	Down	ATPase, Na+/K+ transporting, alpha 3 polypeptide	BC020177	Atp1a3	NM_144921	Mm.44101///Mm.44101///Mm.44101///Mm.44101
10560608	3.21808	Down	apolipoprotein C-II	BC024697	Apoc2	NM_009695	Mm.28394///Mm.471630///Mm.28394///Mm.471630///Mm.28394///Mm.471630
10560242	8.91915	Down	complement component 5a receptor 1	BC125641	C5ar1	NM_007577	Mm.247623///Mm.247623///Mm.247623
10559486	3.11402	Down	leukocyte-associated Ig-like receptor 1	BC025901	Lair1	NM_001113474|NM_178611	Mm.290880///Mm.290880///Mm.290880///Mm.290880///Mm.290880///Mm.290880///Mm.290880///Mm.290880///Mm.290880
10559478	5.11736	Down	paired-Ig-like receptor A3 | paired-Ig-like receptor A11 | paired-Ig-like receptor A4 | paired-Ig-like receptor A7 | paired-Ig-like receptor A2 | hypothetical protein LOC100038909	U96684|U96685|BC103529|U96688	Pira3|Pira11|Pira4|Pira7|Pira2|LOC100038909	NM_011090|NM_011088|NM_011091	Mm.440989///Mm.3189///Mm.446966///Mm.440989///Mm.440989///Mm.440989///Mm.3189///Mm.446966///Mm.440989///Mm.440989
10559467	14.2996	Down	paired-Ig-like receptor A11 | paired-Ig-like receptor A6 | paired-Ig-like receptor A4 | paired-Ig-like receptor A3 | paired-Ig-like receptor A7 | paired-Ig-like receptor A2 | leukocyte immunoglobulin-like receptor, subfamily B (with TM and ITIM domains), member 3 | similar to Leukocyte immunoglobulin-like receptor, subfamily B (with TM and ITIM domains), member 3 | hypothetical protein LOC1000389…	BC103529|U96687|BC119598|U96685|U96688|BC028756|U96683	Pira11|Pira6|Pira4|Pira3|Pira7|Pira2|Lilrb3|LOC100041146|LOC100038909	NM_011088|NM_011093|NM_008848|NM_011091|NM_011090	Mm.3189///Mm.446966///Mm.440989///Mm.440989///Mm.440989///Mm.3189///Mm.446966///Mm.440989///Mm.440989///Mm.440989///Mm.326531///Mm.440814
10559454	8.3039	Down	paired-Ig-like receptor A11 | paired-Ig-like receptor A4 | paired-Ig-like receptor A6 | paired-Ig-like receptor A3 | paired-Ig-like receptor A7 | paired-Ig-like receptor A2 | hypothetical protein LOC100038909 | similar to Leukocyte immunoglobulin-like receptor, subfamily B (with TM and ITIM domains), member 3	BC103529|U96685|AF041035|BC128500|U96688|U96683	Pira11|Pira4|Pira6|Pira3|Pira7|Pira2|LOC100038909|LOC100041146	NM_011088|NM_011091|NM_008848|NM_011093|NM_011090	Mm.3189///Mm.446966///Mm.440989///Mm.440989///Mm.440989///Mm.3189///Mm.446966///Mm.440989///Mm.440989///Mm.440989
10559446	8.06209	Down	leukocyte immunoglobulin-like receptor, subfamily B (with TM and ITIM domains), member 3	U96689	Lilrb3	NM_011095	Mm.326531///Mm.440814///Mm.326531///Mm.440814///Mm.326531///Mm.440814///Mm.326531///Mm.440814
10559276	3.09715	Down	potassium voltage-gated channel, subfamily Q, member 1	BC045142	Kcnq1	NM_008434	Mm.439769///Mm.453036///Mm.453037///Mm.439769///Mm.453036///Mm.453037///Mm.439769///Mm.453036///Mm.453037///Mm.439769///Mm.453036///Mm.453037
10559207	5.3262	Down	lymphocyte specific 1	D49691	Lsp1	NM_019391	Mm.234003///Mm.234003///Mm.234003///Mm.234003///Mm.234003///Mm.234003///Mm.234003
10558769	2.36048	Down	interferon induced transmembrane protein 1	BC027285	Ifitm1	NM_026820|NM_001112715	Mm.175661///Mm.175661///Mm.175661///Mm.175661///Mm.175661///Mm.175661
10558410	3.93319	Down	protein tyrosine phosphatase, receptor type, E	U35368	Ptpre	NM_011212	Mm.945///Mm.945///Mm.945///Mm.945///Mm.945
10557895	5.32389	Down	integrin alpha X	AF211864	Itgax	NM_021334	Mm.22378///Mm.22378///Mm.22378
10557862	14.201	Down	integrin alpha M		Itgam	NM_001082960|NM_008401	Mm.262106///Mm.262106///Mm.262106///Mm.262106///Mm.262106///Mm.262106
10557591	7.3449	Down	integrin alpha L	AF065902	Itgal	NM_008400	Mm.1618///Mm.1618///Mm.1618///Mm.1618
10557434	2.09477	Down	apolipoprotein B48 receptor	AF141335	Apob48r	NM_138310	Mm.170665///Mm.170665///Mm.170665
10557342	2.53002	Down	interleukin 21 receptor	AF279436	Il21r	NM_021887	Mm.155643///Mm.155643///Mm.155643///Mm.155643
10557177	4.29539	Down	protein kinase C, beta 1	BC127083	Prkcb1	NM_008855	Mm.207496///Mm.207496///Mm.207496
10556598	3.87538	Down	xylosyltransferase 1	AJ539164	Xylt1	NM_175645	Mm.461427///Mm.461427///Mm.461427
10555510	3.95774	Down	phosphodiesterase 2A, cGMP-stimulated	BC086800	Pde2a	NM_001008548	Mm.247564///Mm.247564///Mm.247564///Mm.247564///Mm.247564///Mm.247564
10555389	3.60722	Down	uncoupling protein 2 (mitochondrial, proton carrier)	BC012967	Ucp2	NM_011671	Mm.171378///Mm.171378///Mm.171378
10555297	4.56296	Down	potassium voltage-gated channel, Isk-related subfamily, gene 3	BC004629	Kcne3	NM_020574	Mm.282386///Mm.282386///Mm.282386
10555174	2.81877	Down	leucine rich repeat containing 32		Lrrc32	NM_001113379	Mm.323057///Mm.323057
10555118	3.55356	Down	p21 (CDKN1A)-activated kinase 1	AF082077	Pak1	NM_011035	Mm.260227///Mm.260227///Mm.260227
10554945	2.3019	Down	prolylcarboxypeptidase (angiotensinase C)	BC055022	Prcp	NM_028243	Mm.389969///Mm.389969///Mm.389969
10554839	2.59235	Down	phosphatidylinositol binding clathrin assembly protein	BC025566	Picalm	NM_146194	Mm.235175///Mm.235175///Mm.235175///Mm.235175///Mm.235175
10554808	2.77262	Down	frizzled homolog 4 (Drosophila)	BC015256	Fzd4	NM_008055	Mm.387968///Mm.387968///Mm.387968
10554789	4.60854	Down	cathepsin C	U74683	Ctsc	NM_009982	Mm.322945///Mm.322945///Mm.322945///Mm.322945
10554574	6.60931	Down	transmembrane 6 superfamily member 1	BC023123	Tm6sf1	NM_145375	Mm.221412///Mm.221412///Mm.221412
10554521	2.54733	Down	phosphodiesterase 8A	AF067806	Pde8a	NM_008803	Mm.458069///Mm.458069///Mm.458069///Mm.458069
10554370	2.86258	Down	zinc finger protein 710	BC058640	Zfp710	NM_175433	Mm.290925///Mm.290925///Mm.290925
10553042	3.19656	Down	Ras interacting protein 1	BC127059	Rasip1	NM_028544	Mm.181396///Mm.181396///Mm.181396
10552697	6.34338	Down	napsin A aspartic peptidase	D88899	Napsa	NM_008437	Mm.383181///Mm.383181///Mm.383181
10552252	3.30011	Down	RIKEN cDNA 1600014C10 gene	BC085480	1600014C10Rik	NM_001085385|NM_028166	Mm.187554///Mm.187554///Mm.187554///Mm.187554
10551891	5.88578	Down	nuclear factor of kappa light polypeptide gene enhancer in B-cells inhibitor, delta	AY078069	Nfkbid	NM_172142	Mm.386878///Mm.386878///Mm.386878///Mm.386878///Mm.386878
10551883	7.81835	Down	TYRO protein tyrosine kinase binding protein	BC056450	Tyrobp	NM_011662	Mm.46301///Mm.46301///Mm.46301
10551696	5.29985	Down	RAS guanyl releasing protein 4	AF331457	Rasgrp4	NM_145149	Mm.465324///Mm.465324///Mm.465324///Mm.465324
10551666	2.98929	Down	mitogen-activated protein kinase kinase kinase kinase 1	BC005433	Map4k1	NM_008279	Mm.148278///Mm.148278///Mm.148278
10551185	3.82943	Down	transforming growth factor, beta 1	BC013738	Tgfb1	NM_011577	Mm.248380///Mm.248380///Mm.248380
10550906	3.93515	Down	plasminogen activator, urokinase receptor	BC010309	Plaur	NM_011113	Mm.1359///Mm.1359///Mm.1359
10550706	2.44738	Down	exocyst complex component 3-like 2		Exoc3l2
10550627	2.00068	Down	G protein-coupled receptor 4	BC099398	Gpr4	NM_175668	Mm.135984///Mm.135984///Mm.135984///Mm.135984
10550509	5.48847	Down	peptidoglycan recognition protein 1	AF076482	Pglyrp1	NM_009402	Mm.21855///Mm.21855///Mm.21855
10549635	4.8149	Down		AY998482	EG232801	NM_001081239	Mm.258061///Mm.258061///Mm.258061
10549282	2.49733	Down	inositol 1,4,5-triphosphate receptor 2	AB182288	Itpr2	NM_019923|NM_010586	Mm.7800///Mm.7800///Mm.7800///Mm.7800///Mm.7800///Mm.7800
10548892	3.5129	Down	Rho, GDP dissociation inhibitor (GDI) beta	L07918	Arhgdib	NM_007486	Mm.2241///Mm.2241///Mm.2241///Mm.2241///Mm.2241
10548817	14.9232	Down	RIKEN cDNA 1100001H23 gene	BC019793	1100001H23Rik		Mm.3311///Mm.3311
10548735	4.90464	Down	dual specificity phosphatase 16	BC059232	Dusp16	NM_130447|NM_001048054	Mm.3994///Mm.3994///Mm.3994///Mm.3994///Mm.3994///Mm.3994
10548729	2.3118	Down	MANSC domain containing 1	BC039930	Mansc1	NM_026345	Mm.57648///Mm.57648///Mm.57648
10548375	12.5199	Down	C-type lectin domain family 7, member a	AF262985	Clec7a	NM_020008	Mm.239516///Mm.239516///Mm.239516
10548367	2.09666	Down	C-type lectin domain family 1, member a	BC052840	Clec1a	NM_175526	Mm.131289///Mm.131289///Mm.131289
10548105	2.45694	Down	cyclin D2	BC049086	Ccnd2	NM_009829	Mm.333406///Mm.333406///Mm.333406
10547769	9.11356	Down	protein tyrosine phosphatase, non-receptor type 6	BC012660	Ptpn6	NM_013545|NM_001077705	Mm.271799///Mm.271799///Mm.271799///Mm.271799///Mm.271799
10547664	23.4021	Down	C-type lectin domain family 4, member e	AB024717	Clec4e	NM_019948	Mm.248327///Mm.248327///Mm.248327
10547657	4.541	Down	complement component 3a receptor 1	U77460	C3ar1	NM_009779	Mm.2408///Mm.2408///Mm.2408
10547621	11.1627	Down	apolipoprotein B editing complex 1	BC003792	Apobec1	NM_031159	Mm.3333///Mm.3333///Mm.3333///Mm.3333///Mm.3333
10547177	8.56031	Down	Ras association (RalGDS/AF-6) domain family member 4	BC060709	Rassf4	NM_178045	Mm.257931///Mm.257931///Mm.257931
10547100	4.28234	Down	plexin D1	AY688678	Plxnd1	NM_026376	Mm.3085///Mm.3085///Mm.3085///Mm.3085
10546685	2.58814	Down	eukaryotic translation initiation factor 4E member 3	BC027014	Eif4e3	NM_025829	Mm.32889///Mm.32889///Mm.32889
10546661	2.01018	Down	forkhead box P1	AF339103	Foxp1	NM_053202	Mm.234965///Mm.234965///Mm.234965///Mm.234965///Mm.234965///Mm.234965///Mm.234965///Mm.234965///Mm.234965///Mm.234965///Mm.234965///Mm.234965
10546567	2.46341	Down	RIKEN cDNA A130022J15 gene	BC048939	A130022J15Rik	NM_175313	Mm.251789///Mm.251789///Mm.251789
10546010	5.36995	Down	Rho GTPase activating protein 25		Arhgap25	NM_001037727|NM_175476	Mm.119564///Mm.119564///Mm.119564///Mm.119564///Mm.119564
10545930	7.08715	Down		AK157959
10545921	7.18733	Down	MAX dimerization protein 1	BC034860	Mxd1	NM_010751	Mm.279580///Mm.392980///Mm.279580///Mm.392980///Mm.279580///Mm.392980
10545623	2.25691	Down	docking protein 1	BC013066	Dok1	NM_010070	Mm.156///Mm.156///Mm.156
10544891	2.59459	Down	nucleotide-binding oligomerization domain containing 1	BC042670	Nod1	NM_172729	Mm.28498///Mm.28498///Mm.28498
10544732	4.79199	Down	src family associated phosphoprotein 2	BC003711	Skap2	NM_018773	Mm.221479///Mm.221479///Mm.221479
10544583	4.67377	Down	GTPase, IMAP family member 6	BC028779	Gimap6	NM_153175	Mm.321047///Mm.321047///Mm.321047
10544273	6.56111	Down	C-type lectin domain family 5, member a	BC104364	Clec5a	NM_001038604|NM_021364	Mm.103765///Mm.103765///Mm.103765///Mm.103765///Mm.103765
10544150	5.75102	Down	jumonji C domain-containing histone demethylase 1 homolog D (S. cerevisiae)	BC145848	Jhdm1d	NM_001033430	Mm.293175///Mm.293175///Mm.293175
10544148	5.22673	Down	jumonji C domain-containing histone demethylase 1 homolog D (S. cerevisiae)		Jhdm1d	NM_001033430	Mm.293175///Mm.293175
10544133	2.69937	Down	poly (ADP-ribose) polymerase family, member 12	BC120733	Parp12	NM_172893	Mm.268462///Mm.268462///Mm.268462
10544089	2.44204	Down	zinc finger CCCH type, antiviral 1	BC029090	Zc3hav1	NM_028864	Mm.25243///Mm.25243///Mm.25243///Mm.25243///Mm.25243///Mm.25243
10543791	4.0807	Down	podocalyxin-like	BC054530	Podxl	NM_013723	Mm.89918///Mm.89918///Mm.89918///Mm.89918
10543785	2.73224	Down		AB041803	AB041803		Mm.443019///Mm.443019///Mm.443019
10543306	2.83999	Down	tetraspanin 12	BC068240	Tspan12	NM_173007	Mm.21950///Mm.21950///Mm.21950///Mm.21950
10542981	7.01604	Down	glia maturation factor, gamma	BC011488	Gmfg
10542911	3.91897	Down	sterile alpha motif domain containing 9-like	BC079894	Samd9l		Mm.196013///Mm.196013///Mm.196013
10542691	2.78487	Down	lymphoid-restricted membrane protein	BC052909	Lrmp	NM_008511	Mm.843///Mm.843///Mm.843
10542275	2.28242	Down	ets variant gene 6 (TEL oncogene)	BC052163	Etv6	NM_007961	Mm.269995///Mm.269995///Mm.269995///Mm.269995
10542164	8.44289	Down	C-type lectin domain family 12, member a	BC094904	Clec12a	NM_177686	Mm.90241///Mm.90241///Mm.90241
10542156	5.80486	Down	C-type lectin domain family 2, member d	AF321553	Clec2d	NM_053109	Mm.197536///Mm.197536///Mm.197536
10542120	4.49521	Down	C-type lectin domain family 2, member i	AY256574	Clec2i	NM_020257	Mm.391513///Mm.391513
10541614	23.2587	Down	C-type lectin domain family 4, member d	AF061272	Clec4d	NM_010819	Mm.441101///Mm.441101///Mm.441101
10541605	6.3206	Down	C-type lectin domain family 4, member n	BC023008	Clec4n	NM_020001	Mm.271782///Mm.271782///Mm.271782
10541564	11.3412	Down	C-type lectin domain family 4, member a3	BC034893	Clec4a3	NM_153197	Mm.25684///Mm.25684///Mm.25684
10541555	13.8623	Down	C-type lectin domain family 4, member a1	BC049354	Clec4a1	NM_199311	Mm.297275///Mm.297275///Mm.297275
10541307	3.09253	Down	ubiquitin specific peptidase 18	AF069502	Usp18	NM_011909	Mm.326911///Mm.326911///Mm.326911
10541246	4.74097	Down	interleukin 17 receptor A	U31993	Il17ra	NM_008359	Mm.4481///Mm.4481///Mm.4481
10540897	2.58057	Down	peroxisome proliferator activated receptor gamma	U01841	Pparg	NM_011146	Mm.3020///Mm.3020///Mm.3020
10540795	4.08756	Down	interleukin-1 receptor-associated kinase 2	BC085324	Irak2	NM_172161|NM_001113553	Mm.152142///Mm.152142///Mm.152142///Mm.152142///Mm.152142///Mm.152142///Mm.152142
10540408	3.49721	Down	inositol 1,4,5-triphosphate receptor 1	BC003271	Itpr1	NM_010585	Mm.227912///Mm.227912///Mm.227912///Mm.227912///Mm.227912///Mm.227912
10540168	2.57827	Down	FYVE, RhoGEF and PH domain containing 5	AK220153	Fgd5	NM_172731	Mm.295740///Mm.295740///Mm.295740///Mm.295740
10539894	3.04425	Down	monoglyceride lipase	BC057965	Mgll	NM_011844	Mm.272197///Mm.272197///Mm.272197///Mm.272197///Mm.272197///Mm.272197
10539739	6.98606	Down	aspartic peptidase, retroviral-like 1	DQ841260	Asprv1	NM_026414	Mm.183043///Mm.183043///Mm.183043
10539517	3.18859	Down	dysferlin	AK131144	Dysf	NM_021469|NM_001077694	Mm.220982///Mm.220982///Mm.220982///Mm.220982///Mm.220982///Mm.220982///Mm.220982///Mm.220982
10539080	2.47184	Down	ST3 beta-galactoside alpha-2,3-sialyltransferase 5	AF119416	St3gal5	NM_011375|NM_001035228	Mm.38248///Mm.38248///Mm.38248///Mm.38248///Mm.38248
10538791	3.6051	Down	TNFAIP3 interacting protein 3	EF585494	Tnip3	NM_001001495	Mm.117558///Mm.117558///Mm.117558///Mm.117558
10538590	2.86256	Down	hect domain and RLD 5		Herc5		Mm.297393///Mm.297393
10538138	2.17899	Down	GTPase, IMAP family member 1	BC132601	Gimap1	NM_008376|NM_175860	Mm.252599///Mm.252599///Mm.252599///Mm.252599
10538126	4.10458	Down	GTPase, IMAP family member 4	BC005577	Gimap4	NM_174990|NM_175048	Mm.333048///Mm.472933///Mm.333048///Mm.472933///Mm.333048///Mm.472933///Mm.333048///Mm.472933///Mm.333048///Mm.472933///Mm.333048///Mm.472933
10538123	2.0614	Down	GTPase, IMAP family member 9	BC096680	Gimap9	NM_174960	Mm.116971///Mm.116971///Mm.116971
10538115	2.24303	Down	GTPase, IMAP family member 8	AB178029	Gimap8	NM_001077410|NM_212486	Mm.86514///Mm.86514///Mm.86514///Mm.86514
10537428	2.07019	Down	RAB19, member RAS oncogene family	BC032936	Rab19	NM_011226	Mm.123866///Mm.123866///Mm.123866
10537410	2.58992	Down	thromboxane A synthase 1, platelet	BC029014	Tbxas1	NM_011539	Mm.4054///Mm.4054///Mm.4054///Mm.4054
10537062	3.56907	Down	mesoderm specific transcript	BC006639	Mest	NM_008590	Mm.335639///Mm.335639///Mm.335639
10536898	5.36478	Down	interferon regulatory factor 5	AF028725	Irf5	NM_012057	Mm.6479///Mm.6479///Mm.6479
10536505	3.8947	Down	met proto-oncogene		Met	NM_008591	Mm.86844///Mm.86844///Mm.86844///Mm.86844
10536499	2.57453	Down	caveolin, caveolae protein 1	BC038280	Cav1	NM_007616	Mm.28278///Mm.28278///Mm.28278///Mm.28278///Mm.28278///Mm.28278///Mm.28278
10536494	2.79097	Down	caveolin 2	BC023095	Cav2	NM_016900	Mm.396075///Mm.396075///Mm.396075///Mm.396075
10535938	2.1213	Down	NEDD4 binding protein 2-like 1	BC019754	N4bp2l1	NM_133898	Mm.279932///Mm.279932///Mm.279932
10535866	2.07846	Down	ubiquitin-like 3	AF044222	Ubl3	NM_011908	Mm.21846///Mm.21846///Mm.21846
10535841	3.17798	Down	solute carrier family 46, member 3	BC006902	Slc46a3	NM_027872	Mm.153218///Mm.153218///Mm.153218
10535807	4.43963	Down	FMS-like tyrosine kinase 1	D88689	Flt1	NM_010228	Mm.389712///Mm.389712///Mm.389712///Mm.389712///Mm.389712
10535780	2.68557	Down	FMS-like tyrosine kinase 3	M64689	Flt3	NM_010229	Mm.194///Mm.194///Mm.194///Mm.194
10535065	2.7229	Down	centaurin, alpha 1		Centa1	NM_172723	Mm.297819///Mm.297819///Mm.297819///Mm.297819
10534940	2.09422	Down	paired immunoglobin-like type 2 receptor beta 2 | paired immunoglobin-like type 2 receptor beta 1	BC145880	Pilrb2|Pilrb1	NM_001024932	Mm.332769///Mm.347593
10534935	3.82189	Down	paired immunoglobin-like type 2 receptor beta 1	BC145880	Pilrb1	NM_133209	Mm.347593///Mm.347593///Mm.347593
10534927	6.49006	Down	paired immunoglobin-like type 2 receptor alpha	AJ400844	Pilra	NM_153510	Mm.379385///Mm.379385///Mm.379385///Mm.379385
10534909	6.39391	Down
10534303	2.40298	Down	linker for activation of T cells family, member 2	BC005804	Lat2	NM_020044|NM_022964	Mm.391375///Mm.391375///Mm.391375///Mm.391375///Mm.391375
10534202	7.20162	Down	neutrophil cytosolic factor 1	BC055836	Ncf1	NM_010876	Mm.425296///Mm.425296///Mm.425296
10533993	2.54797	Down	solute carrier family 15, member 4	BC016233	Slc15a4	NM_133895	Mm.28506///Mm.28506///Mm.28506///Mm.28506
10533929	3.1601	Down	scavenger receptor class B, member 1	BC004656	Scarb1	NM_016741	Mm.282242///Mm.282242///Mm.282242
10533720	9.9537	Down	G protein-coupled receptor 109A	BC120715	Gpr109a	NM_030701	Mm.440567///Mm.440567///Mm.440567
10533529	2.73398	Down	calcium/calmodulin-dependent protein kinase kinase 2, beta	BC023103	Camkk2	NM_145358	Mm.289237///Mm.289237///Mm.289237///Mm.289237///Mm.289237///Mm.289237
10533386	2.30238	Down	SH2B adaptor protein 3 | similar to lymphocyte-specific adaptor protein Lnk	BC006759	Sh2b3|LOC100047863	NM_008507	Mm.65493///Mm.65493///Mm.65493///Mm.65493
10533304	2.86236	Down	TRAF type zinc finger domain containing 1	BC038396	Trafd1	NM_172275	Mm.20488///Mm.20488///Mm.20488
10533246	2.73108	Down	2'-5' oligoadenylate synthetase 1G | 2'-5' oligoadenylate synthetase 1A	BC043339|BC013715	Oas1g|Oas1a	NM_011852|NM_145211	Mm.389688///Mm.14301///Mm.389688///Mm.14301///Mm.389688///Mm.14301
10533213	4.56563	Down	2'-5' oligoadenylate synthetase 3 | oncoprotein induced transcript 3	AF453830|BC115879	Oas3|Oit3	NM_145226	Mm.204887///Mm.204887///Mm.204887///Mm.123013
10533198	4.10799	Down	2'-5' oligoadenylate synthetase 2	AF418010	Oas2	NM_145227	Mm.260926///Mm.260926///Mm.260926///Mm.260926
10532744	6.57273	Down	selectin, platelet (p-selectin) ligand	BC003874	Selplg	NM_009151	Mm.332590///Mm.332590///Mm.332590///Mm.332590///Mm.332590
10532711	2.40105	Down	chemokine-like receptor 1	BC100612	Cmklr1	NM_008153	Mm.5196///Mm.5196///Mm.5196
10532630	4.52205	Down	adrenergic receptor kinase, beta 2		Adrbk2	NM_177078|NM_001035531	Mm.285619///Mm.285619///Mm.285619
10532150	2.5719	Down	RIKEN cDNA 2900024C23 gene	BC116683	2900024C23Rik	NM_026062	Mm.277897///Mm.277897///Mm.277897
10531994	2.85718	Down	macrophage activation 2 like | guanylate nucleotide binding protein 4 | predicted gene, EG634650 | macrophage activation 2 like LOC626578	BC007143|EF494424|EU304258|BC111039|DQ985743	Mpa2l|Gbp4|EG634650|LOC626578	NM_194336|NM_008620|NM_001039647	Mm.275893///Mm.440525///Mm.458435///Mm.275893///Mm.440525///Mm.275893///Mm.440525///Mm.458435///Mm.458435///Mm.275893///Mm.458435
10531980	3.9665	Down		DQ985742	BC057170	NM_172777	Mm.425261///Mm.425261///Mm.425261
10531972	2.05788	Down	RIKEN cDNA 5830443L24 gene	BC031475	5830443L24Rik	NM_029509	Mm.458519///Mm.458519///Mm.458519///Mm.458519///Mm.458519
10531931	4.75001	Down	SPARC-like 1 (mast9, hevin)	U77330	Sparcl1	NM_010097	Mm.29027///Mm.29027///Mm.29027
10531919	2.4809	Down	hydroxysteroid (17-beta) dehydrogenase 11	BC038340	Hsd17b11	NM_053262	Mm.46019///Mm.46019///Mm.46019
10531370	5.52309	Down	Nacylethanolamine acid amidase	BC004572	Naaa	NM_025972	Mm.28890///Mm.28890///Mm.28890
10530841	3.68442	Down	insulin-like growth factor binding protein 7	BC092538	Igfbp7	NM_008048	Mm.233470///Mm.233470///Mm.233470///Mm.233470
10530692	5.34964	Down	kinase insert domain protein receptor	BC020530	Kdr	NM_010612	Mm.285///Mm.285///Mm.285///Mm.285
10530269	2.72874	Down	RNA binding motif protein 47	BC112902	Rbm47	NM_178446|NM_139065	Mm.36863///Mm.426431///Mm.36863///Mm.426431///Mm.36863///Mm.426431///Mm.36863///Mm.426431///Mm.36863///Mm.426431///Mm.36863///Mm.426431///Mm.36863///Mm.426431
10530151	3.48749	Down	toll-like receptor 6	AB020808	Tlr6	NM_011604	Mm.42146///Mm.42146///Mm.42146
10530145	5.12597	Down	toll-like receptor 1	AF316985	Tlr1	NM_030682	Mm.273024///Mm.273024///Mm.273024
10529875	2.93519	Down	LIM domain binding 2	U89489	Ldb2	NM_001077398|NM_010698	Mm.25785///Mm.25785///Mm.25785///Mm.25785///Mm.25785
10529801	2.92312	Down	F-box and leucine-rich repeat protein 5	BC047214	Fbxl5	NM_178729	Mm.25794///Mm.25794///Mm.25794///Mm.25794///Mm.25794
10529497	2.26096	Down	SH3 domain and tetratricopeptide repeats 1	BC024909	Sh3tc1	NM_194344	Mm.290429///Mm.290429///Mm.290429///Mm.290429
10528268	2.0798	Down	protein tyrosine phosphatase, non-receptor type 12	BC051980	Ptpn12	NM_011203	Mm.319117///Mm.319117///Mm.319117
10528207	2.59342	Down	CD36 antigen	L23108	Cd36	NM_007643	Mm.18628///Mm.18628///Mm.18628
10527732	2.56693	Down	furry homolog (Drosophila)	AK220506	Fry		Mm.216590///Mm.216590///Mm.216590///Mm.216590
10527638	10.8285	Down	arachidonate 5-lipoxygenase activating protein	BC026209	Alox5ap	NM_009663	Mm.19844///Mm.19844///Mm.19844
10526947	2.47405	Down	RIKEN cDNA C130050O18 gene	BC100320	C130050O18Rik	NM_177000	Mm.440271///Mm.440271///Mm.440271
10526459	3.03363	Down	RAS p21 protein activator 4	BC049381	Rasa4	NM_133914|NM_001039103	Mm.290655///Mm.290655///Mm.290655///Mm.290655///Mm.290655
10525439	2.14322	Down	purinergic receptor P2X, ligand-gated ion channel 4	AF089751	P2rx4	NM_011026	Mm.290884///Mm.290884///Mm.290884///Mm.290884///Mm.290884
10525419	2.6406	Down	purinergic receptor P2X, ligand-gated ion channel, 7	BC062808	P2rx7	NM_011027|NM_001038839|NM_001038845|NM_001038887	Mm.42026///Mm.42026///Mm.42026///Mm.42026///Mm.42026///Mm.42026///Mm.42026///Mm.42026
10525397	2.0379	Down	actin related protein 2/3 complex, subunit 3	BC013618	Arpc3	NM_019824	Mm.275942///Mm.275942///Mm.275942
10525086	2.76657	Down	solute carrier family 24 (sodium/potassium/calcium exchanger), member 6	AF261233	Slc24a6	NM_133221	Mm.291070///Mm.291070///Mm.291070///Mm.291070///Mm.291070
10524844	2.04652	Down	TAO kinase 3		Taok3	NM_001081308	Mm.248296///Mm.248296///Mm.248296///Mm.248296
10524631	4.64487	Down	2'-5' oligoadenylate synthetase-like 1	AY089728	Oasl1	NM_145209	Mm.95479///Mm.95479///Mm.95479///Mm.95479
10524621	3.61187	Down	2'-5' oligoadenylate synthetase-like 2	BC034361	Oasl2	NM_011854	Mm.228363///Mm.228363///Mm.228363
10523772	3.385	Down	leucine rich repeat containing 8D	BC037717	Lrrc8d	NM_178701|NM_001122768	Mm.23837///Mm.23837///Mm.23837///Mm.23837
10523766	3.42426	Down	leucine rich repeat containing 8 family, member C	BC026572	Lrrc8c	NM_133897	Mm.319847///Mm.392291///Mm.319847///Mm.392291///Mm.319847///Mm.392291
10523758	2.24578	Down	leucine rich repeat containing 8 family, member B		Lrrc8b	NM_001033550	Mm.439828///Mm.439828///Mm.439828
10522335	2.42796	Down	ATPase, class V, type 10D	BC029551	Atp10d	NR_003966|NM_153389	Mm.32775///Mm.32775///Mm.32775///Mm.32775
10521678	2.98528	Down	CD38 antigen	BC046312	Cd38	NM_007646	Mm.249873///Mm.249873///Mm.249873
10521667	5.4153	Down	bone marrow stromal cell antigen 1	L32812	Bst1	NM_009763	Mm.246332///Mm.246332///Mm.246332
10521602	2.41813	Down	cytoplasmic polyadenylation element binding protein 2	BC107349	Cpeb2	NM_175937	Mm.7233///Mm.7233///Mm.7233///Mm.7233
10521205	3.90386	Down	SH3-domain binding protein 2	BC085497	Sh3bp2	NM_011893	Mm.5012///Mm.5012///Mm.5012///Mm.5012
10520126	2.28508	Down	nitric oxide synthase 3, endothelial cell	BC052636	Nos3	NM_008713	Mm.258415///Mm.258415///Mm.258415///Mm.258415
10519983	7.07081	Down	fibrinogen-like protein 2	BC028893	Fgl2	NM_008013	Mm.292100///Mm.292100///Mm.292100
10519951	6.65443	Down	RIKEN cDNA A530088I07 gene	BC059054	A530088I07Rik	NM_175437	Mm.121705///Mm.121705///Mm.121705
10519607	2.50657	Down	RIKEN cDNA 4930420K17 gene		4930420K17Rik	NM_001081029	Mm.439954///Mm.439954
10519527	2.79302	Down	ATP-binding cassette, sub-family B (MDR/TAP), member 1A	M33581	Abcb1a	NM_011076	Mm.207354///Mm.207354///Mm.207354///Mm.207354
10519497	3.17664	Down	STEAP family member 4	BC006651	Steap4	NM_054098	Mm.31403///Mm.31403///Mm.31403
10518686	4.34875	Down	phosphatidylinositol 3-kinase catalytic delta polypeptide	BC035203	Pik3cd	NM_008840|NM_001029837	Mm.229108///Mm.229108///Mm.229108///Mm.229108///Mm.229108///Mm.229108///Mm.229108
10518674	2.26599	Down	retinol binding protein 7, cellular	AY141971	Rbp7	NM_022020	Mm.46023///Mm.46023///Mm.46023
10518341	2.6798	Down	protein phosphatase 2, regulatory subunit B (B56), alpha isoform | similar to Protein phosphatase 2, regulatory subunit B (B56), alpha	BC059026	Ppp2r5a|LOC100046393	NM_144880	Mm.205569///Mm.205569///Mm.205569///Mm.205569
10518300	4.57253	Down	tumor necrosis factor receptor superfamily, member 1b	M59378	Tnfrsf1b	NM_011610	Mm.235328///Mm.235328///Mm.235328
10518069	3.22752	Down	EF hand domain containing 2	BC125303	Efhd2	NM_025994	Mm.395598///Mm.395598///Mm.395598
10517287	2.77528	Down	mannosidase, alpha, class 1C, member 1	BC067023	Man1c1	NM_207237	Mm.18905///Mm.18905///Mm.18905///Mm.18905///Mm.18905
10517165	10.6605	Down	CD52 antigen	M55561	Cd52	NM_013706	Mm.24130///Mm.24130///Mm.24130///Mm.24130
10517116	2.43779	Down	ribosomal protein S6 kinase polypeptide 1	BC094470	Rps6ka1	NM_009097	Mm.301827///Mm.301827///Mm.301827///Mm.301827
10516966	12.1718	Down		BC013712	BC013712	NM_001033308	Mm.290912///Mm.290912///Mm.290912
10516956	3.64237	Down	sphingomyelin phosphodiesterase, acid-like 3B	BC009087	Smpdl3b	NM_133888	Mm.287187///Mm.287187///Mm.287187
10516637	3.36065	Down		BC030183	BC030183	NM_182783	Mm.20377///Mm.20377///Mm.20377
10516266	2.88516	Down	zinc finger CCCH type containing 12A	BC036563	Zc3h12a	NM_153159	Mm.402///Mm.402///Mm.402
10515994	2.22303	Down	stromal membrane-associated GTPase-activating protein 2	BC052413	Smap2	NM_133716	Mm.271819///Mm.271819///Mm.271819
10515771	3.58013	Down	tyrosine kinase receptor 1	X80764	Tie1	NM_011587	Mm.4345///Mm.4345///Mm.4345
10515399	4.20199	Down	polo-like kinase 3 (Drosophila)	BC031180	Plk3	NM_013807	Mm.259022///Mm.259022///Mm.259022
10515028	2.26632	Down	zinc finger, FYVE domain containing 9	DQ303413	Zfyve9	NM_183300	Mm.196776///Mm.196776///Mm.196776///Mm.196776///Mm.196776///Mm.196776
10514221	4.31916	Down	adipose differentiation related protein	M93275	Adfp	NM_007408	Mm.381///Mm.381///Mm.381
10514054	4.0542	Down	nuclear factor I/B	Y07685	Nfib	NM_001113209|NM_001113210|NM_008687	Mm.317947///Mm.317947///Mm.317947///Mm.317947///Mm.317947///Mm.317947///Mm.317947///Mm.317947///Mm.317947///Mm.317947///Mm.317947///Mm.317947
10514049	3.84573	Down	nuclear factor I/B	BC096542	Nfib	NM_001113209|NM_001113210|NM_008687	Mm.317947///Mm.317947///Mm.317947///Mm.317947///Mm.317947
10513666	3.29622	Down	AT-hook transcription factor	BC092227	Akna	NM_001045514	Mm.387725///Mm.387725///Mm.387725///Mm.387725
10512766	3.28749	Down	tripartite motif-containing 14	AK172895	Trim14	NM_029077	Mm.240252///Mm.240252///Mm.240252///Mm.240252
10512470	3.93293	Down	CD72 antigen	BC003824	Cd72	NM_001110320|NM_007654|NM_001110321|NM_001110322	Mm.188157///Mm.188157///Mm.188157///Mm.188157///Mm.188157///Mm.188157///Mm.188157///Mm.188157///Mm.188157///Mm.188157
10512067	2.98959	Down	DEAD (Asp-Glu-Ala-Asp) box polypeptide 58	AY553221	Ddx58	NM_172689	Mm.86382///Mm.86382///Mm.86382///Mm.86382
10511498	2.32249	Down	pleckstrin homology domain containing, family F (with FYVE domain) member 2	BC016134	Plekhf2	NM_175175	Mm.34351///Mm.34351///Mm.34351
10511084	2.62919	Down	NAD kinase	BC004012	Nadk	NM_138671	Mm.28347///Mm.28347///Mm.28347///Mm.28347///Mm.28347///Mm.28347
10510197	2.65743	Down	protein phosphatase 2, regulatory subunit B (B56), alpha isoform | similar to Protein phosphatase 2, regulatory subunit B (B56), alpha	BC059026	Ppp2r5a|LOC100046393	NM_144880	Mm.205569///Mm.205569///Mm.205569///Mm.205569
10510162	2.71728	Down	protein phosphatase 2, regulatory subunit B (B56), alpha isoform | similar to Protein phosphatase 2, regulatory subunit B (B56), alpha	BC059026	Ppp2r5a|LOC100046393	NM_144880	Mm.205569///Mm.205569///Mm.205569///Mm.205569
10509280	3.0344	Down	perlecan (heparan sulfate proteoglycan 2)		Hspg2	NM_008305	Mm.273662///Mm.273662///Mm.273662
10508772	9.35629	Down		BC057863	Fgr	NM_010208	Mm.271665///Mm.271665///Mm.271665
10508734	9.73427	Down	platelet-activating factor receptor		Ptafr	NM_001081211	Mm.89389///Mm.89389
10508663	7.41957	Down	lysosomal-associated protein transmembrane 5	U29539	Laptm5	NM_010686	Mm.271868///Mm.271868///Mm.271868///Mm.271868
10508651	3.92705	Down	syndecan 3	BC054795	Sdc3	NM_011520	Mm.206536///Mm.206536///Mm.206536
10508465	2.01589	Down	MARCKS-like 1	X61399	Marcksl1	NM_010807	Mm.424974///Mm.424974///Mm.424974
10508074	18.4518	Down	colony stimulating factor 3 receptor (granulocyte)	BC116635	Csf3r	NM_007782	Mm.271701///Mm.271701///Mm.271701///Mm.271701///Mm.271701
10507784	2.15363	Down	palmitoyl-protein thioesterase 1	AF071025	Ppt1	NM_008917	Mm.277719///Mm.277719///Mm.277719///Mm.277719///Mm.277719
10507218	2.15149	Down	MAP kinase-interacting serine/threonine kinase 1	BC021369	Mknk1	NM_021461	Mm.209327///Mm.209327///Mm.209327///Mm.209327///Mm.209327///Mm.209327
10506335	3.29419	Down	phosphodiesterase 4B, cAMP specific	AF208023	Pde4b	NM_019840	Mm.20181///Mm.20181///Mm.20181///Mm.20181///Mm.20181///Mm.20181///Mm.20181///Mm.20181///Mm.20181///Mm.20181///Mm.20181
10506301	2.87067	Down	leptin receptor	U52915	Lepr	NM_001122899|NM_146146|NM_010704	Mm.259282///Mm.259282///Mm.259282///Mm.259282///Mm.259282///Mm.259282///Mm.259282///Mm.259282
10505465	2.19495	Down	RIKEN cDNA 6330416G13 gene	BC023748	6330416G13Rik	NM_144905	Mm.41523///Mm.41523///Mm.41523///Mm.41523///Mm.41523
10504838	2.94763	Down	nuclear receptor subfamily 4, group A, member 3	BC068150	Nr4a3	NM_015743	Mm.247261///Mm.247261///Mm.247261
10504817	2.36334	Down	transforming growth factor, beta receptor I	BC063260	Tgfbr1	NM_009370	Mm.197552///Mm.197552///Mm.197552///Mm.197552///Mm.197552
10504672	2.18723	Down	tudor domain containing 7	BC029689	Tdrd7	NM_146142	Mm.275413///Mm.275413///Mm.275413///Mm.275413///Mm.275413
10504450	2.83202	Down	GLI pathogenesis-related 2	BC031750	Glipr2	NM_027450	Mm.22213///Mm.22213///Mm.22213///Mm.22213
10503222	3.02859	Down	chromodomain helicase DNA binding protein 7	BC034239	Chd7	NM_001081417	Mm.138792///Mm.138792///Mm.138792///Mm.138792
10503220	2.34323	Down	chromodomain helicase DNA binding protein 7		Chd7	NM_001081417	Mm.138792///Mm.138792///Mm.138792
10503218	3.65565	Down	chromodomain helicase DNA binding protein 7		Chd7	NM_001081417	Mm.138792///Mm.138792///Mm.138792
10503214	2.73081	Down	chromodomain helicase DNA binding protein 7		Chd7	NM_001081417	Mm.138792///Mm.138792///Mm.138792
10503212	3.36311	Down	chromodomain helicase DNA binding protein 7		Chd7	NM_001081417	Mm.138792///Mm.138792///Mm.138792
10503210	2.53159	Down	chromodomain helicase DNA binding protein 7		Chd7	NM_001081417	Mm.138792///Mm.138792///Mm.138792
10503202	2.70041	Down	chromodomain helicase DNA binding protein 7		Chd7	NM_001081417	Mm.138792///Mm.138792///Mm.138792
10503200	2.15004	Down	chromodomain helicase DNA binding protein 7		Chd7	NM_001081417	Mm.138792///Mm.138792///Mm.138792
10503198	3.48044	Down	chromodomain helicase DNA binding protein 7		Chd7	NM_001081417	Mm.138792///Mm.138792///Mm.138792
10503196	4.44207	Down	chromodomain helicase DNA binding protein 7		Chd7	NM_001081417	Mm.138792///Mm.138792///Mm.138792
10503194	3.51274	Down	chromodomain helicase DNA binding protein 7		Chd7	NM_001081417	Mm.138792///Mm.138792///Mm.138792
10503192	2.10374	Down	chromodomain helicase DNA binding protein 7		Chd7	NM_001081417	Mm.138792///Mm.138792///Mm.138792
10503190	2.53973	Down	chromodomain helicase DNA binding protein 7		Chd7	NM_001081417	Mm.138792///Mm.138792///Mm.138792
10503188	2.77319	Down	chromodomain helicase DNA binding protein 7		Chd7	NM_001081417	Mm.138792///Mm.138792///Mm.138792
10503186	2.55659	Down	chromodomain helicase DNA binding protein 7		Chd7	NM_001081417	Mm.138792///Mm.138792///Mm.138792
10503184	2.47265	Down	chromodomain helicase DNA binding protein 7		Chd7	NM_001081417	Mm.138792///Mm.138792///Mm.138792
10503182	3.23616	Down	chromodomain helicase DNA binding protein 7		Chd7	NM_001081417	Mm.138792///Mm.138792///Mm.138792
10503180	3.15654	Down	chromodomain helicase DNA binding protein 7		Chd7	NM_001081417	Mm.138792///Mm.138792///Mm.138792
10503176	4.25635	Down	chromodomain helicase DNA binding protein 7		Chd7	NM_001081417	Mm.138792///Mm.138792///Mm.138792
10503174	3.63707	Down	chromodomain helicase DNA binding protein 7		Chd7	NM_001081417	Mm.138792///Mm.138792///Mm.138792
10503172	2.35105	Down	chromodomain helicase DNA binding protein 7		Chd7	NM_001081417	Mm.138792///Mm.138792///Mm.138792
10503170	2.1164	Down	chromodomain helicase DNA binding protein 7		Chd7	NM_001081417	Mm.138792///Mm.138792///Mm.138792
10503168	2.7004	Down	chromodomain helicase DNA binding protein 7		Chd7	NM_001081417	Mm.138792///Mm.138792///Mm.138792
10503166	2.14004	Down	chromodomain helicase DNA binding protein 7		Chd7	NM_001081417	Mm.138792///Mm.138792///Mm.138792
10503161	2.61032	Down	chromodomain helicase DNA binding protein 7		Chd7	NM_001081417	Mm.138792///Mm.138792///Mm.138792
10503134	2.08742	Down	syndecan binding protein	BC019400	Sdcbp	NM_001098227|NM_016807	Mm.247473///Mm.247473///Mm.247473///Mm.247473///Mm.247473///Mm.247473
10503107	6.59641	Down	RIKEN cDNA 6330407A03 gene	AK018133	6330407A03Rik
10503098	7.91645	Down	Yamaguchi sarcoma viral (v-yes-1) oncogene homolog	BC031547	Lyn	NM_001111096|NM_010747	Mm.317331///Mm.317331///Mm.317331///Mm.317331///Mm.317331
10502791	3.29341	Down	interferon-induced protein 44	BC112402	Ifi44	NM_133871	Mm.30756///Mm.30756///Mm.30756
10502638	3.05208	Down	chloride channel calcium activated 5	BC096379	Clca5	NM_178697	Mm.331420///Mm.331420///Mm.331420
10502552	2.92014	Down	chloride channel calcium activated 1	AF052746	Clca1	NM_009899	Mm.454553///Mm.454553///Mm.454553///Mm.454553
10502537	2.02051	Down	SH3-domain GRB2-like B1 (endophilin)	AF272946	Sh3glb1	NM_019464	Mm.271775///Mm.271775///Mm.271775///Mm.271775
10502299	2.9213	Down	nuclear factor of kappa light polypeptide gene enhancer in B-cells 1, p105	M57999	Nfkb1	NM_008689	Mm.256765///Mm.256765///Mm.256765///Mm.256765///Mm.256765
10502224	7.05039	Down	sphingomyelin synthase 2	BC117782	Sgms2	NM_028943	Mm.273360///Mm.273360///Mm.273360
10502081	2.44625	Down	glutamyl aminopeptidase	M29961	Enpep	NM_007934	Mm.1193///Mm.1193///Mm.1193
10502052	2.65766	Down	alpha-kinase 1	AK173191	Alpk1		Mm.158704///Mm.158704
10502050	3.06139	Down	alpha-kinase 1	AK173191	Alpk1		Mm.158704///Mm.158704
10502042	3.15918	Down	alpha-kinase 1	AK173191	Alpk1		Mm.158704///Mm.158704
10501734	3.00667	Down	palmdelphin	AL391037	Palmd	NM_023245	Mm.253736///Mm.253736///Mm.253736
10501629	2.08856	Down	CDC14 cell division cycle 14 homolog A (S. cerevisiae)	BC072644	Cdc14a	NM_001080818	Mm.17647///Mm.17647///Mm.17647///Mm.17647
10501586	3.26662	Down	sphingosine-1-phosphate receptor 1	BC051023	S1pr1	NM_007901	Mm.982///Mm.982///Mm.982
10501164	2.24609	Down	colony stimulating factor 1 (macrophage)	M21952	Csf1	NM_007778|NM_001113529|NM_001113530	Mm.795///Mm.795///Mm.795///Mm.795///Mm.795
10501063	12.3574	Down	CD53 antigen	BC021310	Cd53	NM_007651	Mm.316861///Mm.316861///Mm.316861
10501020	17.4779	Down	chitinase 3-like 3	M94584	Chi3l3	NM_009892	Mm.387173///Mm.387173///Mm.387173
10500982	5.43897	Down	RIKEN cDNA I830077J02 gene		I830077J02Rik	NM_001033780	Mm.239081///Mm.239081
10500976	2.97951	Down	RAS-related protein-1a	BC083128	Rap1a	NM_145541	Mm.458171///Mm.458171///Mm.458171
10500896	2.0907	Down			EG624251	XR_002221
10500677	2.15299	Down	CD2 antigen	BC053731	Cd2	NM_013486	Mm.22842///Mm.22842///Mm.22842///Mm.22842
10500656	2.88043	Down	immunoglobulin superfamily, member 2	AM849329	Igsf2	NM_001099332	Mm.190915///Mm.190915
10500335	5.98895	Down	Fc receptor, IgG, high affinity I	M31314	Fcgr1	NM_010186	Mm.150///Mm.150///Mm.150///Mm.150
10500295	2.07909	Down	pleckstrin homology domain containing, family O member 1	AF168675	Plekho1	NM_023320	Mm.458147///Mm.458147///Mm.458147
10500276	6.19341	Down		BC028528|AF534879	BC028528		Mm.89556///Mm.89556
10499861	24.1637	Down	S100 calcium binding protein A9 (calgranulin B)	M83219	S100a9	NM_009114	Mm.2128///Mm.2128///Mm.2128
10499655	3.85756	Down	interleukin 6 receptor, alpha		Il6ra	NM_010559	Mm.2856///Mm.2856
10499536	2.35864	Down	ephrin A1	BC002046	Efna1	NM_010107	Mm.15675///Mm.15675///Mm.15675
10499378	3.62848	Down	sema domain, immunoglobulin domain (Ig), transmembrane domain (TM) and short cytoplasmic domain, (semaphorin) 4A	BC025800	Sema4a	NM_013658	Mm.439752///Mm.439752///Mm.439752///Mm.439752
10498998	2.52636	Down	RIKEN cDNA D930015E06 gene	BC062940	D930015E06Rik	NM_172681	Mm.28838///Mm.28838///Mm.28838///Mm.28838
10498992	8.05876	Down	toll-like receptor 2	BC014693	Tlr2	NM_011905	Mm.87596///Mm.87596///Mm.87596
10498623	2.09718	Down	karyopherin (importin) alpha 4	BC052162	Kpna4	NM_008467	Mm.30601///Mm.30601///Mm.30601
10498576	2.40597	Down	latexin	D88769	Lxn	NM_016753	Mm.2632///Mm.2632///Mm.2632
10498531	2.9057	Down	cyclin L1	BC007177	Ccnl1	NM_019937	Mm.175612///Mm.175612///Mm.175612///Mm.175612
10498367	3.0439	Down	purinergic receptor P2Y, G-protein coupled 13	BC119043	P2ry13	NM_028808	Mm.90067///Mm.90067///Mm.90067
10498345	2.37916	Down	G protein-coupled receptor 171	BC024054	Gpr171	NM_173398	Mm.123648///Mm.123648///Mm.123648
10498273	3.0737	Down	transmembrane 4 superfamily member 1	BC083073	Tm4sf1	NM_008536	Mm.856///Mm.856///Mm.856
10498024	9.1179	Down	solute carrier family 7 (cationic amino acid transporter, y+ system), member 11	AY766236	Slc7a11	NM_011990	Mm.260988///Mm.260988///Mm.260988
10497931	2.63795	Down	CASP8 and FADD-like apoptosis regulator	BC085105	Cflar	NM_009805	Mm.336848///Mm.336848///Mm.336848
10497689	2.04304	Down	guanine nucleotide binding protein (G protein), beta 4	BC028753	Gnb4	NM_013531	Mm.139192///Mm.139192///Mm.139192///Mm.139192
10497590	2.18124	Down	ecotropic viral integration site 1	BC076620	Evi1	NM_007963	Mm.56965///Mm.56965///Mm.56965///Mm.56965///Mm.56965
10497421	3.37349	Down	Hermansky-Pudlak syndrome 3 homolog (human)	BC058235	Hps3	NM_080634	Mm.291533///Mm.291533///Mm.291533///Mm.291533
10497372	12.8008	Down	SIRP beta 1 like 1 protein	DQ055451	LOC381484		Mm.217376///Mm.217376
10497364	20.3951	Down	signal-regulatory protein beta 1 | similar to SIRP beta 1 cell surface protein	AB109404	Sirpb1|LOC100038947|LOC668101	NM_001002898	Mm.330924///Mm.425126///Mm.330924///Mm.425126///Mm.330924///Mm.425126///Mm.330924///Mm.425126///Mm.330924///Mm.423523///Mm.425126///Mm.423523
10497358	21.2715	Down	signal-regulatory protein beta 1 | similar to SIRP beta 1 cell surface protein	AB109404	Sirpb1|LOC100038947|LOC668101	NM_001002898	Mm.330924///Mm.425126///Mm.330924///Mm.425126///Mm.330924///Mm.425126///Mm.423523///Mm.330924///Mm.425126///Mm.330924///Mm.423523///Mm.425126
10497356	19.2259	Down	signal-regulatory protein beta 1 | similar to SIRP beta 1	AB109404	Sirpb1|LOC668101	NM_001002898	Mm.330924///Mm.425126///Mm.330924///Mm.425126///Mm.330924///Mm.425126///Mm.330924///Mm.423523///Mm.425126
10497349	20.9343	Down	signal-regulatory protein beta 1 | similar to SIRP beta 1 | similar to SIRP beta 1 cell surface protein	AB109404|AB112025	Sirpb1|LOC668101|LOC100038947	NM_001002898	Mm.330924///Mm.425126///Mm.330924///Mm.425126///Mm.330924///Mm.425126///Mm.330924///Mm.425126///Mm.330924///Mm.423523///Mm.425126///Mm.330924///Mm.425126///Mm.423523
10497265	2.70527	Down	fatty acid binding protein 4, adipocyte	BC002148	Fabp4	NM_024406	Mm.582///Mm.582///Mm.582
10497203	2.00383	Down	hairy/enhancer-of-split related with YRPW motif 1	AF151521	Hey1	NM_010423	Mm.29581///Mm.29581///Mm.29581
10496872	4.64479	Down	EGF, latrophilin seven transmembrane domain containing 1	AF385682	Eltd1	NM_133222	Mm.317261///Mm.317261///Mm.317261
10496592	2.54282	Down	guanylate nucleotide binding protein 2	AF077007	Gbp2	NM_010260	Mm.24038///Mm.24038///Mm.24038
10496539	3.4352	Down	guanylate nucleotide binding protein 5	BC058555	Gbp5	NM_153564	Mm.459245///Mm.459245///Mm.459245
10496359	4.55637	Down	endomucin	BC003706	Emcn	NM_016885	Mm.27343///Mm.27343///Mm.27343///Mm.27343///Mm.27343///Mm.27343
10495967	6.92614	Down	TRAF-interacting protein with forkhead-associated domain | similar to Traf2 binding protein	BC065775	Tifa|LOC637082	NM_145133	Mm.31852///Mm.31852///Mm.31852
10495416	2.62042	Down	vav 3 oncogene	BC052739	Vav3	NM_020505|NM_146139	Mm.282257///Mm.282257///Mm.282257///Mm.282257///Mm.282257
10495285	3.83397	Down	sortilin 1	BC056343	Sort1	NM_019972	Mm.157119///Mm.157119///Mm.157119///Mm.157119
10494595	4.41001	Down	Notch gene homolog 2 (Drosophila)	D32210	Notch2	NM_010928	Mm.254017///Mm.254017///Mm.254017///Mm.254017
10494306	3.01615	Down	myeloid cell leukemia sequence 1	BC021638	Mcl1	NM_008562	Mm.1639///Mm.1639///Mm.1639
10494271	11.8877	Down	cathepsin S	AF038546	Ctss	NM_021281	Mm.3619///Mm.3619///Mm.3619///Mm.3619
10493831	11.8781	Down	S100 calcium binding protein A8 (calgranulin A)	M83218	S100a8	NM_013650	Mm.21567///Mm.21567///Mm.21567
10493726	2.31174	Down	DENN/MADD domain containing 4B	AY512564	Dennd4b	NM_201407	Mm.30571///Mm.30571///Mm.30571///Mm.30571
10493604	2.28563	Down	src homology 2 domain-containing transforming protein E	BC109363	She	NM_172530	Mm.225///Mm.225///Mm.225///Mm.225
10493267	2.86882	Down	rho/rac guanine nucleotide exchange factor (GEF) 2	AF177032	Arhgef2	NM_008487	Mm.239329///Mm.239329///Mm.239329///Mm.239329
10493114	2.01964	Down	nestin	AF076623	Nes	NM_016701	Mm.331129///Mm.331129///Mm.331129
10492997	2.33519	Down	ets variant gene 3 | similar to ets variant gene 3	AF218539	Etv3|LOC100045950	NM_001083318|NM_012051	Mm.219460///Mm.219460///Mm.219460///Mm.219460
10492682	2.63348	Down	RIKEN cDNA 1110032E23 gene	BC056975|AF285091	1110032E23Rik	NM_133187	Mm.427274///Mm.427274///Mm.427274///Mm.427274
10492335	2.18848	Down	RAP2B, member of RAS oncogene family	BC032168	Rap2b	NM_028712	Mm.472720///Mm.472720///Mm.472720
10491300	3.00633	Down	SKI-like	U36203	Skil	NM_011386|NM_001039090	Mm.15406///Mm.15406///Mm.15406///Mm.15406
10491091	3.91848	Down	tumor necrosis factor (ligand) superfamily, member 10	U37522	Tnfsf10	NM_009425	Mm.1062///Mm.1062///Mm.1062
10490731	2.63035	Down	SRY-box containing gene 18	L35032	Sox18	NM_009236	Mm.264904///Mm.264904///Mm.264904
10490632	2.61932	Down		AK173259	BC006779	NM_183162	Mm.315872///Mm.315872///Mm.315872///Mm.315872///Mm.315872///Mm.315872
10490212	2.66308	Down	cathepsin Z	AF136277	Ctsz	NM_022325	Mm.156919///Mm.156919///Mm.156919
10490150	5.26998	Down	Z-DNA binding protein 1	BC020033	Zbp1	NM_021394	Mm.116687///Mm.116687///Mm.116687
10489850	2.7686	Down	zinc finger, NFX1-type containing 1		Znfx1	NM_001033196	Mm.297074///Mm.297074///Mm.297074
10489784	2.4671	Down		BC067047	BC067047	NM_177782	Mm.34420///Mm.395887///Mm.34420///Mm.395887///Mm.34420///Mm.395887///Mm.34420///Mm.395887///Mm.34420///Mm.395887
10489569	2.71652	Down	phospholipid transfer protein	U37226	Pltp	NM_011125	Mm.6105///Mm.6105///Mm.6105///Mm.6105///Mm.6105
10489463	5.07828	Down	secretory leukocyte peptidase inhibitor	U73004	Slpi	NM_011414	Mm.371583///Mm.371583///Mm.371583
10489377	2.35116	Down	serine incorporator 3	AB029499	Serinc3	NM_012032	Mm.435797///Mm.435797///Mm.435797///Mm.435797
10489246	4.65464	Down	v-maf musculoaponeurotic fibrosarcoma oncogene family, protein B (avian)	BC038256	Mafb	NM_010658	Mm.330745///Mm.330745///Mm.330745
10488415	2.26255	Down	cystatin C	M59470	Cst3	NM_009976	Mm.4263///Mm.4263///Mm.4263
10488382	5.11038	Down	CD93 antigen	AF081789	Cd93	NM_010740	Mm.681///Mm.681///Mm.681
10488378	2.90876	Down	thrombomodulin	BC019154	Thbd	NM_009378	Mm.24096///Mm.24096///Mm.24096
10487945	4.15718	Down	preimplantation protein 4	BC033408	Prei4	NM_028802|NM_001042671|NM_001042672	Mm.211211///Mm.211211///Mm.211211///Mm.211211///Mm.211211///Mm.211211///Mm.211211///Mm.211211///Mm.211211///Mm.211211
10487906	2.045	Down	solute carrier family 23 (nucleobase transporters), member 2	AY004874	Slc23a2	NM_018824	Mm.103581///Mm.103581///Mm.103581///Mm.103581
10487894	3.13031	Down	Ras association (RalGDS/AF-6) domain family member 2	BC057402	Rassf2	NM_175445	Mm.204737///Mm.204737///Mm.204737///Mm.204737
10487823	2.79515	Down	sialic acid binding Ig-like lectin 1, sialoadhesin	Z36233	Siglec1	NM_011426	Mm.1374///Mm.1374///Mm.1374///Mm.1374///Mm.1374
10487597	24.494	Down	interleukin 1 beta	BC011437	Il1b	NM_008361	Mm.222830///Mm.222830///Mm.222830
10487588	8.51592	Down	interleukin 1 alpha	BC003727	Il1a	NM_010554	Mm.15534///Mm.15534///Mm.15534
10487506	2.16424	Down			OTTMUSG00000015351
10487321	2.59523	Down	RIKEN cDNA 2010106G01 gene	BC026578	2010106G01Rik	NM_023220	Mm.269928///Mm.269928///Mm.269928///Mm.269928
10487238	11.9239	Down	histidine decarboxylase	BC052833	Hdc	NM_008230	Mm.18603///Mm.18603///Mm.18603
10486396	2.61264	Down	EH-domain containing 4	AF173639	Ehd4	NM_133838	Mm.132226///Mm.132226///Mm.132226
10486197	2.31057	Down	ras homolog gene family, member V	BC021307	Rhov	NM_145530	Mm.120274///Mm.120274///Mm.120274
10486119	3.9091	Down	phospholipase C, beta 2	BC038048	Plcb2	NM_177568	Mm.215156///Mm.215156///Mm.215156///Mm.215156///Mm.215156
10485405	6.29237	Down	CD44 antigen	BC051388	Cd44	NM_009851|NM_001039150|NM_001039151	Mm.423621///Mm.423621///Mm.423621///Mm.423621///Mm.423621///Mm.423621///Mm.423621///Mm.423621///Mm.423621///Mm.423621///Mm.423621///Mm.423621///Mm.423621///Mm.423621///Mm.423621///Mm.423621///Mm.423621///Mm.423621///Mm.423621
10485388	2.39018	Down	low density lipoprotein receptor class A domain containing 3		Ldlrad3	NM_178886	Mm.35116///Mm.35116///Mm.35116///Mm.35116
10485378	3.45246	Down	RIKEN cDNA 2600010E01 gene	BC048394	2600010E01Rik	NM_001083810|NM_175181|NM_001110849	Mm.24138///Mm.24138///Mm.24138///Mm.24138///Mm.24138
10485357	8.91767	Down		AK089567|AK172117|AK172170|AK171721|AK156257|AK171704|AK171891|AK171928|AK156563|AK156768|AK154549
10485081	2.39094	Down	diacylglycerol kinase zeta	BC049228	Dgkz	NM_138306	Mm.314923///Mm.314923///Mm.314923///Mm.314923///Mm.314923///Mm.314923
10484941	2.54103	Down	MAP-kinase activating death domain	AY263980	Madd	NM_145527	Mm.36410///Mm.36410///Mm.36410///Mm.36410///Mm.36410///Mm.36410///Mm.36410///Mm.36410///Mm.36410///Mm.36410///Mm.36410///Mm.36410///Mm.36410///Mm.36410///Mm.36410///Mm.36410///Mm.36410///Mm.36410///Mm.36410
10484894	3.38718	Down	protein tyrosine phosphatase, receptor type, J	D45212	Ptprj	NM_008982	Mm.330393///Mm.330393///Mm.330393///Mm.330393///Mm.330393
10484888	3.20429	Down	similar to PTPRJ | similar to protein tyrosine phosphatase, receptor type, J		LOC668629|LOC627525|LOC638059	XM_001002717|XM_892197|XM_913939
10483817	2.50215	Down		AK031731	ENSMUSG00000075275
10483809	2.33922	Down	nuclear factor, erythroid derived 2, like 2	BC026943	Nfe2l2	NM_010902	Mm.1025///Mm.1025///Mm.1025
10483698	3.04784	Down	WAS/WASL interacting protein family, member 1	BC049788	Wipf1	NM_153138	Mm.223504///Mm.223504///Mm.223504///Mm.223504///Mm.223504
10483110	3.57859	Down	interferon induced with helicase C domain 1	AF374384	Ifih1	NM_027835	Mm.136224///Mm.136224///Mm.136224///Mm.136224
10482802	14.1352	Down	pleckstrin homology, Sec7 and coiled-coil domains, binding protein	BC007144	Pscdbp	NM_139200	Mm.273905///Mm.273905///Mm.273905
10482517	2.05899	Down	N-myc (and STAT) interactor	BC002019	Nmi	NM_019401	Mm.7491///Mm.7491///Mm.7491///Mm.7491
10481949	2.55491	Down	Tnf receptor-associated factor 1	L35302	Traf1	NM_009421	Mm.239514///Mm.239514///Mm.239514///Mm.239514
10481627	6.62096	Down	lipocalin 2	BC132069	Lcn2	NM_008491	Mm.9537///Mm.9537///Mm.9537///Mm.9537
10481540	2.38046	Down	formin binding protein 1	AK122308	Fnbp1	NM_001038700|NM_019406	Mm.52297///Mm.52297///Mm.52297///Mm.52297///Mm.52297///Mm.52297///Mm.52297///Mm.52297///Mm.52297///Mm.52297///Mm.52297///Mm.52297///Mm.52297///Mm.52297///Mm.52297
10481349	2.09637	Down	netrin G2 | RIKEN cDNA 6530402F18 gene	AF475080|AK220426	Ntng2|6530402F18Rik	NM_133501|NM_133500	Mm.442448///Mm.442448///Mm.442448///Mm.442448///Mm.471653///Mm.442448///Mm.471653///Mm.442448///Mm.471653///Mm.442448///Mm.471653///Mm.442448///Mm.471653///Mm.442448///Mm.471653///Mm.471653///Mm.471653
10481164	6.99984	Down	solute carrier family 2 (facilitated glucose transporter), member 6	BC058210	Slc2a6	NM_172659	Mm.41203///Mm.41203///Mm.41203///Mm.41203
10481056	3.20541	Down	Notch gene homolog 1 (Drosophila)	AF508809	Notch1	NM_008714	Mm.290610///Mm.290610///Mm.290610///Mm.290610///Mm.290610
10480956	2.56459	Down	caspase recruitment domain family, member 9	BC065797	Card9	NM_001037747	Mm.330064///Mm.330064///Mm.330064///Mm.330064
10480570	2.17616	Down	arrestin domain containing 1	BC018501	Arrdc1	NM_178408	Mm.45275///Mm.45275///Mm.45275///Mm.45275///Mm.45275///Mm.45275
10480347	4.50554	Down	phosphatidylinositol-5-phosphate 4-kinase, type II, alpha	BC011097	Pip4k2a	NM_008845	Mm.313977///Mm.313977///Mm.313977///Mm.313977///Mm.313977
10480035	4.16962	Down	6-phosphofructo-2-kinase/fructose-2,6-biphosphatase 3	BC052400	Pfkfb3	NM_133232	Mm.19669///Mm.19669///Mm.19669///Mm.19669///Mm.19669///Mm.19669///Mm.19669///Mm.19669///Mm.19669
10479950	3.51967	Down	CUG triplet repeat, RNA binding protein 2	AF090696	Cugbp2	NM_001110231|NM_001110232|NM_001110228|NM_010160|NM_001110229|NM_001110230	Mm.398543///Mm.398543///Mm.398543///Mm.398543///Mm.398543///Mm.398543///Mm.398543///Mm.398543///Mm.398543///Mm.398543///Mm.398543///Mm.398543
10478897	3.07737	Down	protein tyrosine phosphatase, non-receptor type 1	BC010191	Ptpn1	NM_011201	Mm.277916///Mm.277916///Mm.277916
10478890	2.88034	Down	CCAAT/enhancer binding protein (C/EBP), beta	M61007	Cebpb	NM_009883	Mm.439656///Mm.439656///Mm.439656
10478678	2.49452	Down	CD40 antigen	M83312	Cd40	NM_170701|NM_011611|NM_170704|NM_170703|NM_170702	Mm.271833///Mm.271833///Mm.271833///Mm.271833///Mm.271833///Mm.271833///Mm.271833///Mm.271833///Mm.271833///Mm.271833
10478633	5.80437	Down	matrix metallopeptidase 9	BC046991	Mmp9	NM_013599	Mm.4406///Mm.4406///Mm.4406
10478594	2.37904	Down	cathepsin A	J05261	Ctsa	NM_008906|NM_001038492	Mm.359633///Mm.359633///Mm.359633///Mm.359633///Mm.359633///Mm.359633///Mm.359633///Mm.359633///Mm.359633///Mm.359633
10478447	2.24995	Down	serine/threonine kinase 4	BC054521	Stk4	NM_021420	Mm.234472///Mm.234472///Mm.234472///Mm.234472///Mm.234472
10477250	9.30417	Down	hemopoietic cell kinase	BC010478	Hck	NM_010407	Mm.715///Mm.715///Mm.715///Mm.715
10477237	2.22772	Down		BC020535	BC020535		Mm.299979///Mm.299979///Mm.299979
10476401	3.51875	Down	phospholipase C, beta 1	BC058710	Plcb1	NM_019677	Mm.330607///Mm.330607///Mm.330607///Mm.330607///Mm.330607
10476301	4.82488	Down	spermine oxidase	BC004831	Smox	NM_145533	Mm.136586///Mm.136586///Mm.136586///Mm.136586///Mm.136586///Mm.136586///Mm.136586///Mm.136586///Mm.136586///Mm.136586///Mm.136586///Mm.136586
10476021	5.45122	Down	signal-regulatory protein alpha	D87967	Sirpa	NM_007547	Mm.1682///Mm.1682///Mm.1682///Mm.1682///Mm.1682///Mm.1682///Mm.1682
10475866	4.9892	Down	BCL2-like 11 (apoptosis facilitator)	BC019556	Bcl2l11	NM_207680|NM_207681|NM_009754	Mm.141083///Mm.141083///Mm.141083///Mm.141083///Mm.141083///Mm.141083///Mm.141083///Mm.141083///Mm.141083///Mm.141083
10475782	3.60877	Down	dual specificity phosphatase 2	BC048696	Dusp2	NM_010090	Mm.4729///Mm.4729///Mm.4729
10475544	2.32864	Down	sema domain, transmembrane domain (TM), and cytoplasmic domain, (semaphorin) 6D	AB091532	Sema6d	NM_172537|NM_199241|NM_199239|NM_199240|NM_199238	Mm.330536///Mm.330536///Mm.330536///Mm.330536///Mm.330536///Mm.330536///Mm.330536///Mm.330536///Mm.330536///Mm.330536///Mm.330536///Mm.330536///Mm.330536///Mm.330536///Mm.330536
10475487	3.96753	Down	solute carrier family 28 (sodium-coupled nucleoside transporter), member 2	BC055376	Slc28a2	NM_172980	Mm.29510///Mm.29510///Mm.29510///Mm.29510///Mm.29510///Mm.29510
10475414	3.92652	Down	beta-2 microglobulin	BC085164	B2m	NM_009735	Mm.163///Mm.163///Mm.163
10475229	2.07372	Down	START domain containing 9	AK122489|BC034905	Stard9		Mm.389390///Mm.389390///Mm.389390///Mm.389390///Mm.389390
10475226	2.66528	Down	START domain containing 9		Stard9		Mm.389390///Mm.389390
10475218	3.23757	Down	START domain containing 9		Stard9
10475199	2.74389	Down	synaptosomal-associated protein 23	AB007444	Snap23	NM_009222	Mm.245715///Mm.245715///Mm.245715///Mm.245715///Mm.245715///Mm.245715
10474958	2.89623	Down	delta-like 4 (Drosophila)	AF253469	Dll4	NM_019454	Mm.143719///Mm.143719///Mm.143719
10474700	6.53841	Down	thrombospondin 1	BC042422	Thbs1	NM_011580	Mm.4159///Mm.4159///Mm.4159
10474545	2.13902	Down	solute carrier family 12, member 6	AF211854	Slc12a6	NM_133649|NM_133648	Mm.46449///Mm.46449///Mm.46449///Mm.46449///Mm.46449///Mm.46449///Mm.46449
10474201	3.26208	Down	LIM domain only 2	BC057880	Lmo2	NM_008505	Mm.29266///Mm.29266///Mm.29266///Mm.29266///Mm.29266///Mm.29266
10474064	2.25233	Down	transformation related protein 53 inducible protein 11	BC098206	Trp53i11	NM_001025246	Mm.41033///Mm.41033///Mm.41033///Mm.41033///Mm.41033
10473809	8.70456	Down	SFFV proviral integration 1	X17463	Sfpi1	NM_011355	Mm.1302///Mm.1302///Mm.1302
10473444	4.0987	Down	angiotensin receptor-like 1	BC039224	Agtrl1	NM_011784	Mm.29368///Mm.29368///Mm.29368
10473125	6.16337	Down	integrin alpha 4 | ceramide kinase-like	AF109136	Itga4|Cerkl	NM_010576	Mm.31903///Mm.31903///Mm.440704///Mm.31903///Mm.31903///Mm.440704
10472860	3.06262	Down	Rap guanine nucleotide exchange factor (GEF) 4	AK220281	Rapgef4	NM_019688	Mm.196153///Mm.196153///Mm.196153///Mm.196153///Mm.196153
10472820	3.04413	Down	integrin alpha 6	BC058095	Itga6	NM_008397	Mm.225096///Mm.225096///Mm.225096///Mm.225096///Mm.225096
10472538	4.09312	Down	dehydrogenase/reductase (SDR family) member 9	BC118029	Dhrs9	NM_175512	Mm.211655///Mm.211655///Mm.211655
10472514	3.15882	Down	nitric oxide synthase trafficker	BC069942	Nostrin	NM_181547	Mm.90047///Mm.90047///Mm.90047
10472501	2.1791	Down	LAG1 homolog, ceramide synthase 6	BC057629	Lass6	NM_172856	Mm.222222///Mm.222222///Mm.222222
10471929	6.10798	Down	Rho GTPase activating protein 15	BC024887	Arhgap15	NM_153820|NM_001025377	Mm.217350///Mm.217350///Mm.217350///Mm.217350///Mm.217350///Mm.217350///Mm.217350///Mm.217350
10471505	3.40862	Down	SH2 domain containing 3C	AF168364	Sh2d3c	NM_013781	Mm.9593///Mm.9593///Mm.9593///Mm.9593///Mm.9593
10471486	3.20978	Down	endoglin	BC029080	Eng	NM_007932	Mm.225297///Mm.225297///Mm.225297///Mm.225297
10470283	3.39027	Down	EGF-like domain 7	AY239290	Egfl7	NM_198724|NM_178444|NM_198725	Mm.268933///Mm.268933///Mm.268933///Mm.268933///Mm.268933///Mm.268933///Mm.268933///Mm.268933
10469936	3.2811	Down	Notch-regulated ankyrin repeat protein	AY046077	Nrarp	NM_025980	Mm.46539///Mm.46539///Mm.46539
10469867	2.04303	Down	patatin-like phospholipase domain containing 7	EU293208	Pnpla7	NM_146251	Mm.389243///Mm.389243///Mm.389243
10469816	10.342	Down	interleukin 1 receptor antagonist	BC042532	Il1rn	NM_031167|NM_001039701	Mm.882///Mm.882///Mm.882///Mm.882///Mm.882///Mm.882///Mm.882///Mm.882
10469786	20.07	Down	interleukin 1 family, member 9	AY071843	Il1f9	NM_153511	Mm.249379///Mm.249379///Mm.249379
10469695	4.00873	Down	amyloid beta (A4) precursor protein-binding, family B, member 1 interacting protein	BC023110	Apbb1ip	NM_019456	Mm.14255///Mm.14255///Mm.14255
10469425	2.39134	Down	ADP-ribosylation factor-like 5B	BC066810	Arl5b	NM_029466	Mm.174068///Mm.174068///Mm.174068///Mm.174068
10468949	3.4301	Down	DNA cross-link repair 1C, PSO2 homolog (S. cerevisiae)	AF387731	Dclre1c	NM_146114|NM_175683|NM_001110214	Mm.23483///Mm.23483///Mm.23483///Mm.23483///Mm.23483///Mm.23483///Mm.23483///Mm.23483///Mm.23483///Mm.23483
10468893	3.99818	Down	colony stimulating factor 2 receptor, alpha, low-affinity (granulocyte-macrophage)	M85078	Csf2ra	NM_009970	Mm.287228///Mm.287228///Mm.287228
10467578	7.20346	Down	phosphoinositide-3-kinase adaptor protein 1	AF293806	Pik3ap1	NM_031376	Mm.222266///Mm.222266///Mm.222266///Mm.222266
10467420	2.30212	Down	PDZ and LIM domain 1 (elfin)	AF053367	Pdlim1	NM_016861	Mm.5567///Mm.5567///Mm.5567
10467139	2.07784	Down	lysosomal acid lipase A	BC058564	Lipa	NM_021460|NM_001111100	Mm.157545///Mm.157545///Mm.157545///Mm.157545
10467068	3.68138	Down	sphingomyelin synthase 1	BC076618	Sgms1	NM_144792	Mm.329810///Mm.329810///Mm.329810///Mm.329810
10467041	2.14828	Down	N-acylsphingosine amidohydrolase 2	AB037181	Asah2	NM_018830	Mm.104900///Mm.104900///Mm.104900///Mm.104900
10466659	2.4475	Down	guanine deaminase	AF174583	Gda	NM_010266	Mm.45054///Mm.45054///Mm.45054
10466521	2.59389	Down	glucosaminyl (N-acetyl) transferase 1, core 2	BC039126	Gcnt1	NM_173442|NM_010265	Mm.244825///Mm.244825///Mm.244825///Mm.244825
10466210	13.0911	Down	membrane-spanning 4-domains, subfamily A, member 6D	BC018331	Ms4a6d	NM_026835	Mm.290390///Mm.290390///Mm.290390
10466200	2.24483	Down	membrane-spanning 4-domains, subfamily A, member 7	BC024402	Ms4a7	NM_027836|NM_001025610	Mm.193094///Mm.193094///Mm.193094///Mm.193094///Mm.193094///Mm.193094
10466130	2.97636	Down	membrane-spanning 4-domains, subfamily A, member 8A	BC042719	Ms4a8a	NM_022430	Mm.34460///Mm.34460///Mm.34460
10465587	3.02361	Down	fermitin family homolog 3 (Drosophila)	BC066803	Fermt3	NM_153795	Mm.157591///Mm.157591///Mm.157591
10465446	2.24833	Down	coiled-coil domain containing 88B		Ccdc88b	NM_001081291	Mm.329596///Mm.329596///Mm.329596
10464704	2.104	Down	adrenergic receptor kinase, beta 1	BC053922	Adrbk1	NM_130863	Mm.254144///Mm.254144///Mm.254144///Mm.254144///Mm.254144
10464601	3.07218	Down
10464560	2.2323	Down	aldehyde dehydrogenase 3 family, member B1	BC046597	Aldh3b1	NM_026316	Mm.109341///Mm.109341///Mm.109341///Mm.109341
10464529	2.89682	Down	T-cell, immune regulator 1, ATPase, H+ transporting, lysosomal V0 protein A3	BC006761	Tcirg1	NM_016921	Mm.271689///Mm.271689///Mm.271689
10463945	2.42803	Down	dual specificity phosphatase 5		Dusp5	NM_001085390	Mm.52043///Mm.52043
10463070	2.9486	Down	ectonucleoside triphosphate diphosphohydrolase 1	BC011278	Entpd1	NM_009848	Mm.2824///Mm.2824///Mm.2824///Mm.2824
10462822	2.61582	Down	exocyst complex component 6	BC026859	Exoc6	NM_175353	Mm.24865///Mm.24865///Mm.24865
10462818	2.25174	Down	hematopoietically expressed homeobox	BC057986	Hhex	NM_008245	Mm.33896///Mm.33896///Mm.33896
10462623	2.82232	Down	interferon-induced protein with tetratricopeptide repeats 1	BC003768	Ifit1	NM_008331	Mm.439751///Mm.439751///Mm.439751
10462618	6.11107	Down	interferon-induced protein with tetratricopeptide repeats 3	BC089563	Ifit3	NM_010501	Mm.426079///Mm.426079///Mm.426079
10462613	5.19341	Down	interferon-induced protein with tetratricopeptide repeats 2	BC050835	Ifit2	NM_008332	Mm.2036///Mm.2036///Mm.2036
10462603	2.64042	Down		BC061160	Fas	NM_007987	Mm.1626///Mm.1626///Mm.1626
10462390	8.35803	Down	CD274 antigen	BC066841	Cd274	NM_021893	Mm.245363///Mm.245363///Mm.245363
10462140	4.61017	Down	dedicator of cytokinesis 8	BC029018	Dock8	NM_028785	Mm.102485///Mm.102485///Mm.102485
10462132	2.06144	Down	RIKEN cDNA E030010A14 gene	BC087877	E030010A14Rik	NM_183160	Mm.391170///Mm.391170///Mm.391170
10461991	2.43922	Down	zinc finger, AN1-type domain 5 | similar to zinc finger protein ZNF216	BC119124	Zfand5|LOC100047896	NM_009551	Mm.292405///Mm.292405///Mm.292405
10461765	3.45377	Down	leupaxin	BC026563	Lpxn	NM_134152	Mm.313136///Mm.313136///Mm.313136
10461721	16.4076	Down	macrophage expressed gene 1	BC129843	Mpeg1	NM_010821	Mm.3999///Mm.3999///Mm.3999
10461622	15.1151	Down	membrane-spanning 4-domains, subfamily A, member 6B	AF237909	Ms4a6b	NM_027209	Mm.436639///Mm.436639///Mm.436639
10461614	15.0548	Down	membrane-spanning 4-domains, subfamily A, member 6C	AF237910	Ms4a6c	NM_028595	Mm.458310///Mm.458310///Mm.458310
10461594	25.0442	Down	membrane-spanning 4-domains, subfamily A, member 4C	AF237914	Ms4a4c	NM_029499	Mm.440715///Mm.440715///Mm.440715///Mm.440715
10461587	18.8537	Down	membrane-spanning 4-domains, subfamily A, member 4A | similar to membrane-spanning 4-domains, subfamily A, member 4 isoform a		Ms4a4a|LOC624461	XM_986941	Mm.391204///Mm.391204
10461558	14.0151	Down	solute carrier family 15, member 3	AF121080	Slc15a3	NM_023044	Mm.218870///Mm.218870///Mm.218870
10460968	4.2676	Down	RAS, guanyl releasing protein 2	AF081193	Rasgrp2	NM_011242	Mm.77017///Mm.77017///Mm.77017///Mm.77017///Mm.77017///Mm.77017///Mm.77017
10460891	2.46007	Down	mitogen-activated protein kinase kinase kinase kinase 2	BC116286	Map4k2	NM_009006	Mm.25860///Mm.25860///Mm.25860
10460696	2.58695	Down	solute carrier family 25, member 45	BC037680	Slc25a45	NM_134154	Mm.5323///Mm.5323///Mm.5323
10460237	5.67471	Down	unc-93 homolog B1 (C. elegans)	BC018388	Unc93b1	NM_019449	Mm.262094///Mm.262094///Mm.262094
10459944	2.00745	Down	nuclear factor of activated T-cells, cytoplasmic, calcineurin-dependent 1	BC061509	Nfatc1	NM_198429|NM_016791	Mm.329560///Mm.329560///Mm.329560///Mm.329560///Mm.329560
10459866	3.67324	Down	solute carrier family 14 (urea transporter), member 1	BC086673	Slc14a1	NM_028122	Mm.33832///Mm.33832///Mm.33832///Mm.33832
10459363	3.10469	Down	RIKEN cDNA 9030411M15 gene		9030411M15Rik
10459353	3.89466	Down
10459335	3.28827	Down	RIKEN cDNA 9430028L06 gene	BC075677	9430028L06Rik		Mm.188499///Mm.188499
10459241	2.41664	Down	actin filament associated protein 1-like 1		Afap1l1	NM_178928	Mm.26632///Mm.26632
10458940	2.13078	Down	zinc finger protein 608	BC092219	Zfp608	NM_175751	Mm.192984///Mm.192984///Mm.192984
10458816	2.44316	Down	toll-like receptor adaptor molecule 2	AY275837	Ticam2	NM_173394	Mm.149280///Mm.149280///Mm.149280
10458808	3.10707	Down	fem-1 homolog c (C.elegans)	AK129440	Fem1c	NM_173423	Mm.38249///Mm.38249///Mm.38249
10458555	3.04821	Down	sprouty homolog 4 (Drosophila)	BC050944	Spry4	NM_011898	Mm.42038///Mm.42038///Mm.42038
10458540	2.0266	Down	protocadherin 12	BC127076	Pcdh12	NM_017378	Mm.12862///Mm.12862///Mm.12862
10458498	3.52554	Down	centaurin, delta 3	AK220486	Centd3	NM_139206	Mm.247642///Mm.247642///Mm.247642///Mm.247642
10458430	2.56393	Down	diaphanous homolog 1 (Drosophila)	BC070412	Diap1	NM_007858	Mm.195916///Mm.195916///Mm.195916///Mm.195916///Mm.195916///Mm.195916///Mm.195916
10458382	14.2523	Down	CD14 antigen	BC057889	Cd14	NM_009841	Mm.3460///Mm.3460///Mm.3460
10457225	3.43557	Down	mitogen-activated protein kinase kinase kinase 8	D13759	Map3k8	NM_007746	Mm.3275///Mm.3275///Mm.3275
10456904	5.10672	Down	proline-serine-threonine phosphatase-interacting protein 2	CT010308	Pstpip2	NM_013831	Mm.57174///Mm.57174///Mm.57174///Mm.57174
10456296	4.51694	Down	mucosa associated lymphoid tissue lymphoma translocation gene 1	BC110487	Malt1	NM_172833	Mm.132613///Mm.132613///Mm.132613///Mm.132613
10456071	8.91674	Down	colony stimulating factor 1 receptor	BC036343	Csf1r	NM_001037859	Mm.22574///Mm.22574///Mm.22574///Mm.22574///Mm.22574///Mm.22574
10456005	23.3689	Down	CD74 antigen (invariant polypeptide of major histocompatibility complex, class II antigen-associated)	BC096435	Cd74	NM_001042605|NM_010545	Mm.439737///Mm.439737///Mm.439737///Mm.439737///Mm.439737
10455873	2.34761	Down	solute carrier family 12, member 2	U13174	Slc12a2	NM_009194	Mm.399997///Mm.399997///Mm.399997
10455259	8.11138	Down	Rho GTPase activating protein 26		Arhgap26	NM_175164	Mm.329396///Mm.329396///Mm.329396///Mm.329396///Mm.329396///Mm.329396///Mm.329396
10453939	2.71709	Down	laminin, alpha 3	X84014|X84013	Lama3		Mm.42012///Mm.42012///Mm.42012///Mm.42012
10453678	2.08507	Down	zinc finger E-box binding homeobox 1	U26259	Zeb1	NM_011546	Mm.3929///Mm.3929///Mm.3929
10453272	3.55262	Down	zinc finger protein 36, C3H type-like 2	M58564	Zfp36l2	NM_001001806	Mm.259321///Mm.259321///Mm.259321
10453049	2.49012	Down	CDC42 effector protein (Rho GTPase binding) 3	BC034714	Cdc42ep3	NM_026514	Mm.140601///Mm.140601///Mm.140601
10452815	2.47707	Down	xanthine dehydrogenase	BC003997	Xdh	NM_011723	Mm.11223///Mm.11223///Mm.11223///Mm.11223
10452639	2.01895	Down	myosin light chain, regulatory B	BC099425	Mylc2b	NM_023402	Mm.439903///Mm.439903///Mm.439903
10452633	3.49729	Down	TG interacting factor 1	BC005724	Tgif1	NM_009372	Mm.101034///Mm.101034///Mm.101034
10452571	3.21435	Down	protein tyrosine phosphatase, receptor type, M	BC079621	Ptprm	NM_008984	Mm.311809///Mm.311809///Mm.311809///Mm.311809///Mm.311809///Mm.311809
10452485	2.32937	Down	RAB31, member RAS oncogene family	BC013063	Rab31	NM_133685	Mm.29274///Mm.29274///Mm.29274
10452269	3.03421	Down	DENN/MADD domain containing 1C	BC035208	Dennd1c	NM_153551	Mm.284447///Mm.284447///Mm.284447
10451953	4.5248	Down	leucine-rich alpha-2-glycoprotein 1	AF403429	Lrg1	NM_029796	Mm.348025///Mm.348025///Mm.348025
10451893	2.2661	Down	signal transducing adaptor family member 2	BC026642	Stap2	NM_145934	Mm.204991///Mm.204991///Mm.204991
10451860	4.04884	Down	protection of telomeres 1B		Pot1b	NM_028370	Mm.177073///Mm.177073
10451710	3.63751	Down	raftlin lipid raft linker 1	BC052074	Rftn1	NM_181397	Mm.41854///Mm.41854///Mm.41854
10450699	2.78217	Down	histocompatibility 2, Q region locus 2 | MHC class Ib T9 | histocompatibility 2, D region locus 1	AB359227|AB267093|U47327	H2-Q2|H2-t9|H2-D1		Mm.427969///Mm.455101///Mm.426002///Mm.439648
10450682	2.49775	Down	histocompatibility 2, T region locus 23	BC099472	H2-T23	NM_010398	Mm.457970///Mm.457970///Mm.457970
10450675	6.68306	Down	histocompatibility 2, T region locus 24	L22338	H2-T24	NM_008207	Mm.439654///Mm.439654///Mm.439654///Mm.439654
10450501	7.53601	Down	tumor necrosis factor	M11731	Tnf	NM_013693	Mm.1293///Mm.1293///Mm.1293
10450496	4.30437	Down	leukocyte specific transcript 1	BC086881	Lst1	NM_010734	Mm.19379///Mm.19379///Mm.19379///Mm.19379///Mm.19379
10450484	3.84351	Down	allograft inflammatory factor 1	BC021539	Aif1	NM_019467	Mm.10747///Mm.10747///Mm.10747
10450325	3.2857	Down	complement factor B	BC005451	Cfb	NM_008198	Mm.653///Mm.653///Mm.653
10450161	10.4938	Down	histocompatibility 2, class II antigen E alpha	BC106107	H2-Ea	NM_010381	Mm.15680///Mm.15680///Mm.15680
10450154	15.693	Down	histocompatibility 2, class II antigen A, alpha	BC031711	H2-Aa	NM_010378	Mm.235338///Mm.235338///Mm.235338
10450145	2.58538	Down	proteasome (prosome, macropain) subunit, beta type 9 (large multifunctional peptidase 2)	D44456	Psmb9	NM_013585	Mm.390983///Mm.390983///Mm.390983
10450075	3.84065	Down	histocompatibility 2, K1, K region	U47328	H2-K1	NM_001001892	Mm.422886///Mm.439675///Mm.440940///Mm.466882///Mm.422886///Mm.439675///Mm.440940///Mm.466882///Mm.422886///Mm.439675///Mm.440940///Mm.466882///Mm.422886///Mm.439675///Mm.440940///Mm.466882///Mm.422886///Mm.439675///Mm.440940///Mm.466882///Mm.422886///Mm.439675///Mm.440940///Mm.466882
10449893	2.13714	Down	RIKEN cDNA A430107D22 gene	BC132341	A430107D22Rik	NM_178785	Mm.122284///Mm.122284///Mm.122284
10448836	2.1583	Down	transmembrane protein 204	BC054438	Tmem204	NM_001001183	Mm.34379///Mm.34379///Mm.34379
10448278	2.08621	Down	matrix metallopeptidase 25	BC059059	Mmp25	NM_001033339	Mm.235343///Mm.235343///Mm.235343
10448124	14.1669	Down	formyl peptide receptor 1		Fpr1	NM_013521	Mm.56951///Mm.56951
10448094	2.18667	Down	leucyl/cystinyl aminopeptidase	BC120925	Lnpep	NM_172827	Mm.328807///Mm.328807///Mm.328807
10447902	3.62782	Down	G protein-coupled receptor 31, D17Leh66c region | similar to t-complex protein 10c		Gpr31c|LOC100048768|Tcp10c	NM_001013832	Mm.390936///Mm.390936
10447647	3.42371	Down	G protein-coupled receptor 31, D17Leh66c region | similar to t-complex protein 10c		Gpr31c|LOC100048768|Tcp10c	NM_001013832	Mm.390936///Mm.390936
10447361	3.68933	Down	tetratricopeptide repeat domain 7	BC042512	Ttc7	NM_028639	Mm.77396///Mm.77396///Mm.77396///Mm.77396
10446965	5.23108	Down	RAS, guanyl releasing protein 3	BC066127	Rasgrp3	NM_207246	Mm.329203///Mm.329203///Mm.329203
10446763	3.24117	Down	limb-bud and heart | similar to limb-bud and heart	BC052470	Lbh|LOC100048380	NM_029999	Mm.154109///Mm.154109///Mm.154109
10446656	2.02936	Down	lipin 2	BC039698	Lpin2	NM_022882	Mm.227924///Mm.227924///Mm.227924///Mm.227924///Mm.227924///Mm.227924///Mm.227924
10446282	5.03785	Down	EGF-like module containing, mucin-like, hormone receptor-like sequence 1	X93328	Emr1	NM_010130	Mm.2254///Mm.2254///Mm.2254///Mm.2254///Mm.2254///Mm.2254
10446253	6.3959	Down	vav 1 oncogene	BC020487	Vav1	NM_011691	Mm.248172///Mm.248172///Mm.248172///Mm.248172///Mm.248172///Mm.248172
10445977	2.16251	Down	Epstein-Barr virus induced gene 3	AF013114	Ebi3	NM_015766	Mm.256798///Mm.256798///Mm.256798
10445953	15.7535	Down	EGF-like module containing, mucin-like, hormone receptor-like sequence 4	AF396935	Emr4	NM_139138	Mm.210497///Mm.210497///Mm.210497
10445867	2.57922	Down	phospholipase C-like 2	AB033615	Plcl2	NM_013880	Mm.217362///Mm.217362///Mm.217362
10445774	2.42072	Down	RIKEN cDNA B430306N03 gene	AY522648|DQ087179	B430306N03Rik		Mm.123455///Mm.123455///Mm.123455
10445767	2.01442	Down	triggering receptor expressed on myeloid cells-like 2	DQ341272	Treml2	NM_001033405	Mm.329104///Mm.329104///Mm.329104
10445758	9.29255	Down	triggering receptor expressed on myeloid cells-like 4	AY557629	Treml4	NM_001033922|NM_172623	Mm.131234///Mm.131234///Mm.131234///Mm.131234
10445753	5.50225	Down	triggering receptor expressed on myeloid cells 3	AF241220	Trem3	NM_021407	Mm.302438///Mm.302438///Mm.302438
10445746	18.768	Down	triggering receptor expressed on myeloid cells 1	BC111875	Trem1	NM_021406	Mm.248352///Mm.248352///Mm.248352///Mm.248352
10445412	5.21085	Down	nuclear factor of kappa light polypeptide gene enhancer in B-cells inhibitor, epsilon	BC030923	Nfkbie	NM_008690	Mm.57043///Mm.57043///Mm.57043
10445347	2.471	Down	chloride intracellular channel 5	BC064037	Clic5	NM_172621	Mm.37666///Mm.37666///Mm.37666
10445293	17.1143	Down	phospholipase A2, group VII (platelet-activating factor acetylhydrolase, plasma)	BC010726	Pla2g7	NM_013737	Mm.9277///Mm.9277///Mm.9277///Mm.9277
10445268	3.89472	Down	G protein-coupled receptor 116		Gpr116	NM_001081178	Mm.23478///Mm.23478///Mm.23478
10445119	2.09421	Down	histocompatibility 2, M region locus 3	BC031984	H2-M3	NM_013819	Mm.14437///Mm.14437///Mm.14437
10444821	2.49333	Down	histocompatibility 2, Q region locus 8		H2-Q8	NM_023124	Mm.440195///Mm.440195
10444752	2.28128	Down	lymphotoxin B	U16985	Ltb	NM_008518	Mm.1715///Mm.1715///Mm.1715
10444352	2.29837	Down	Notch gene homolog 4 (Drosophila)	M80456	Notch4	NM_010929	Mm.173813///Mm.173813///Mm.173813
10444298	7.32573	Down	histocompatibility 2, class II antigen E beta	M36940	H2-Eb1	NM_010382	Mm.22564///Mm.22564///Mm.22564///Mm.22564
10444291	14.1504	Down	histocompatibility 2, class II antigen A, beta 1 | response to metastatic cancers 5 | response to metastatic cancers 2	BC057998|M13537	H2-Ab1|Rmcs5|Rmcs2	NM_207105	Mm.254067///Mm.254067///Mm.254067///Mm.254067///Mm.254067
10444258	2.51377	Down	proteasome (prosome, macropain) subunit, beta type 8 (large multifunctional peptidase 7)	BC051450	Psmb8	NM_010724	Mm.180191///Mm.180191///Mm.180191
10444244	2.53006	Down	transporter 1, ATP-binding cassette, sub-family B (MDR/TAP)	M55637	Tap1	NM_013683	Mm.207996///Mm.207996///Mm.207996
10444236	5.36448	Down	histocompatibility 2, class II, locus Mb2 | histocompatibility 2, class II, locus Mb1	BC002237|BC052864	H2-DMb2|H2-DMb1	NM_010388|NM_010387	Mm.472692///Mm.195060///Mm.472692///Mm.195060///Mm.195060///Mm.472692
10444229	2.90577	Down	histocompatibility 2, class II, locus DMa	BC001996	H2-DMa	NM_010386	Mm.16373///Mm.16373///Mm.16373
10444028	2.06102	Down	KN motif and ankyrin repeat domains 3	BC061055	Kank3	NM_030697	Mm.196330///Mm.196330///Mm.196330///Mm.196330
10444016	2.41755	Down	PML-RAR alpha-regulated adaptor molecule 1	AY665714	Pram1	NM_001002842	Mm.272606///Mm.272606///Mm.272606
10443980	10.1348	Down	myosin IF	BC046502	Myo1f	NM_053214	Mm.42019///Mm.42019///Mm.42019///Mm.42019
10443869	3.20295	Down	cytochrome P450, family 4, subfamily f, polypeptide 16	AF233646	Cyp4f16	NM_024442	Mm.30504///Mm.30504///Mm.30504
10443730	4.43625	Down	ATP-binding cassette, sub-family G (WHITE), member 1	AF323659	Abcg1	NM_009593	Mm.15691///Mm.15691///Mm.15691
10443506	3.25804	Down	FYVE, RhoGEF and PH domain containing 2	AF017368	Fgd2	NM_013710	Mm.279187///Mm.279187///Mm.279187
10442596	5.81402	Down	selenoprotein X 1	BC090646	Sepx1	NM_013759	Mm.28212///Mm.28212///Mm.28212///Mm.28212
10442396	2.21572	Down	ATP-binding cassette, sub-family A (ABC1), member 3	AY083616	Abca3	NM_013855|NM_001039581	Mm.239470///Mm.239470///Mm.239470///Mm.239470///Mm.239470
10441093	2.51037	Down	avian erythroblastosis virus E-26 (v-ets) oncogene related	AB073080	Erg	NM_133659	Mm.164531///Mm.164531///Mm.164531///Mm.164531///Mm.164531///Mm.164531
10440849	2.6896	Down	synaptojanin 1	AB093272	Synj1		Mm.187079///Mm.187079
10440738	3.55157	Down	T-cell lymphoma invasion and metastasis 1	U05245	Tiam1	NM_009384	Mm.310902///Mm.310902///Mm.310902///Mm.310902///Mm.310902///Mm.310902
10440513	5.15802	Down	cysteine and tyrosine-rich protein 1	BC099957	Cyyr1	NM_144853	Mm.213203///Mm.213203///Mm.213203
10440393	5.25726	Down	SAM domain, SH3 domain and nuclear localization signals, 1	BC052906	Samsn1	NM_023380	Mm.131406///Mm.131406///Mm.131406///Mm.131406
10440099	2.01376	Down	ST3 beta-galactoside alpha-2,3-sialyltransferase 6	AF119390	St3gal6	NM_018784	Mm.212742///Mm.212742///Mm.212742///Mm.212742///Mm.212742
10439936	5.97608	Down	nuclear factor of kappa light polypeptide gene enhancer in B-cells inhibitor, zeta	AB020974	Nfkbiz	NM_030612	Mm.247272///Mm.247272///Mm.247272///Mm.247272///Mm.247272
10439483	2.2913	Down	Cdc42 GTPase-activating protein	AF151363	Cdgap	NM_020260	Mm.370848///Mm.370848///Mm.370848
10439312	4.06716	Down	CD86 antigen	BC013807	Cd86	NM_019388	Mm.1452///Mm.1452///Mm.1452///Mm.1452
10439268	2.51527	Down	deltex 3-like (Drosophila)	BC085093	Dtx3l	NM_001013371	Mm.390852///Mm.390852///Mm.390852///Mm.390852
10439249	4.43483	Down	poly (ADP-ribose) polymerase family, member 14	DQ372930	Parp14	NM_001039530	Mm.244406///Mm.244406///Mm.244406
10439058	6.37838	Down	leucine rich repeat containing 33	BC027411	Lrrc33	NM_146069	Mm.33498///Mm.33498///Mm.33498///Mm.33498///Mm.33498
10438738	3.55402	Down	B-cell leukemia/lymphoma 6	BC052315	Bcl6	NM_009744	Mm.347398///Mm.347398///Mm.347398
10438639	3.03703	Down	diacylglycerol kinase, gamma	AK220294	Dgkg	NM_138650	Mm.194986///Mm.194986///Mm.194986///Mm.194986
10438626	2.11145	Down	ets variant gene 5	BC034680	Etv5	NM_023794	Mm.155708///Mm.155708///Mm.155708///Mm.155708
10438468	2.66003	Down	cytochrome P450, family 2, subfamily ab, polypeptide 1		Cyp2ab1	NM_183158	Mm.276400///Mm.276400
10438445	4.32894	Down	kelch-like 6 (Drosophila)	BC100568	Klhl6	NM_183390	Mm.86699///Mm.86699///Mm.86699
10438017	4.03237	Down	FYVE, RhoGEF and PH domain containing 4	BC129902	Fgd4	NM_139232|NM_139233|NM_139234	Mm.256131///Mm.256131///Mm.256131///Mm.256131///Mm.256131
10437687	2.8166	Down	LPS-induced TN factor	BC018559	Litaf	NM_019980	Mm.294753///Mm.294753///Mm.294753
10437552	2.57541	Down			AU021092	NM_001033220	Mm.325639///Mm.325639
10437399	2.03075	Down	coronin 7	BC061006	Coro7	NM_030205	Mm.325512///Mm.467629///Mm.325512///Mm.467629///Mm.325512///Mm.467629///Mm.325512///Mm.467629
10437243	7.39598	Down	Mediterranean fever	AF143409	Mefv	NM_019453	Mm.143718///Mm.143718///Mm.143718///Mm.143718
10437224	3.49934	Down	myxovirus (influenza virus) resistance 2	BC007127	Mx2	NR_003508|NM_013606	Mm.14157///Mm.14157///Mm.14157///Mm.14157///Mm.14157
10437210	2.42537	Down	beta-site APP-cleaving enzyme 2	BC120773	Bace2	NM_019517	Mm.97885///Mm.97885///Mm.97885
10437160	3.36843	Down	E26 avian leukemia oncogene 2, 3' domain	BC005504	Ets2	NM_011809	Mm.290207///Mm.290207///Mm.290207
10437023	2.41861	Down	microrchidia 3	BC098072	Morc3	NM_001045529	Mm.287329///Mm.287329///Mm.287329
10436865	3.23767	Down	interferon gamma receptor 2	BC055745	Ifngr2	NM_008338	Mm.249364///Mm.249364///Mm.249364
10436849	2.08111	Down	interferon (alpha and beta) receptor 1	BC052217	Ifnar1	NM_010508	Mm.502///Mm.502///Mm.502
10436841	2.67401	Down	interleukin 10 receptor, beta	AF440787	Il10rb	NM_008349	Mm.4154///Mm.4154///Mm.4154
10436830	2.78865	Down	interferon (alpha and beta) receptor 2	AF013274	Ifnar2	NM_010509|NM_001110498	Mm.6834///Mm.6834///Mm.6834///Mm.6834///Mm.6834
10436100	12.4292	Down	resistin like gamma	AJ536019	Retnlg	NM_181596	Mm.231288///Mm.231288///Mm.231288
10435704	4.0908	Down	CD80 antigen	BC131959	Cd80	NM_009855	Mm.89474///Mm.89474///Mm.89474
10435565	5.93365	Down	hematopoietic cell specific Lyn substrate 1	BC007469	Hcls1	NM_008225	Mm.4091///Mm.4091///Mm.4091
10435185	2.13095	Down
10434932	2.37511	Down		BC099947	BC022623		Mm.28244///Mm.28244
10434845	2.02937	Down	interleukin 1 receptor accessory protein	BC021159	Il1rap	NM_008364|NM_134103	Mm.253424///Mm.253424///Mm.253424///Mm.253424///Mm.253424
10434778	3.63712	Down	receptor transporter protein 4	BC024872	Rtp4	NM_023386	Mm.469936///Mm.469936///Mm.469936
10433507	2.73168	Down	class II transactivator	U60653	Ciita	NM_007575	Mm.249560///Mm.249560///Mm.249560///Mm.249560///Mm.249560
10433101	2.77302	Down	G protein-coupled receptor 84	BC023249	Gpr84	NM_030720	Mm.160369///Mm.160369///Mm.160369
10433096	2.10241	Down	nuclear factor, erythroid derived 2	BC062171	Nfe2	NM_008685	Mm.457989///Mm.457989///Mm.457989
10432957	2.95284	Down	integrin beta 7	M68903	Itgb7	NM_013566	Mm.58///Mm.58///Mm.58
10432682	2.89736	Down	keratin 80	BC119366	Krt80	NM_028770	Mm.440055///Mm.440055///Mm.440055
10432640	7.26258	Down		BC127021
10432636	2.39773	Down		BC004728	BC004728	NM_174992|NM_001033872	Mm.26282///Mm.26282///Mm.26282///Mm.26282
10432439	2.43053	Down	formin-like 3	BC131961	Fmnl3	NM_011711	Mm.29043///Mm.29043///Mm.29043///Mm.29043///Mm.29043///Mm.29043
10431974	2.49057	Down	Rap guanine nucleotide exchange factor (GEF) 3	BC020532	Rapgef3	NM_144850	Mm.24028///Mm.24028///Mm.24028
10431697	3.92339	Down	ATP-binding cassette, sub-family D (ALD), member 2	BC019187	Abcd2	NM_011994	Mm.295456///Mm.295456///Mm.295456
10431393	2.16302	Down	mitogen-activated protein kinase 12	BC021640	Mapk12	NM_013871	Mm.38343///Mm.38343///Mm.38343
10430931	11.2913	Down	Nfat activating molecule with ITAM motif 1	BC150488	Nfam1	NM_028728	Mm.32584///Mm.32584///Mm.32584///Mm.32584///Mm.32584
10430660	3.42725	Down	platelet derived growth factor, B polypeptide	BC053430	Pdgfb	NM_011057	Mm.144089///Mm.144089///Mm.144089
10430389	2.67033	Down	MFNG O-fucosylpeptide 3-beta-N-acetylglucosaminyltransferase	BC010983	Mfng	NM_008595	Mm.149235///Mm.149235///Mm.149235
10430372	5.7904	Down	RAS-related C3 botulinum substrate 2	BC005455	Rac2	NM_009008	Mm.1972///Mm.1972///Mm.1972
10430302	4.72549	Down	colony stimulating factor 2 receptor, beta 2, low-affinity (granulocyte-macrophage)	M29855	Csf2rb2	NM_007781	Mm.1940///Mm.1940///Mm.1940///Mm.1940
10429580	11.7573	Down	RIKEN cDNA I830127L07 gene		I830127L07Rik
10429560	4.30416	Down	lymphocyte antigen 6 complex, locus I	BC125350	Ly6i	NM_020498	Mm.358339///Mm.358339///Mm.358339
10429160	2.24888	Down	ST3 beta-galactoside alpha-2,3-sialyltransferase 1	BC099693	St3gal1	NM_009177	Mm.248334///Mm.248334///Mm.248334///Mm.248334///Mm.248334
10429128	7.46372	Down	src-like adaptor	AJ131777	Sla	NM_001029841|NM_009192	Mm.7601///Mm.7601///Mm.7601///Mm.7601
10428998	3.86251	Down	development and differentiation enhancing	BC094581	Ddef1	NM_010026	Mm.277236///Mm.277236///Mm.277236///Mm.277236///Mm.277236
10428983	3.94869	Down	RIKEN cDNA 0910001A06 gene	BC011343	0910001A06Rik	NM_144846	Mm.246108///Mm.246108///Mm.246108
10428619	3.55408	Down	ectonucleotide pyrophosphatase/phosphodiesterase 2	BC058759	Enpp2	NM_015744	Mm.250256///Mm.250256///Mm.250256
10428536	2.62692	Down	trichorhinophalangeal syndrome I (human) | similar to Trps1 protein	BC099962	Trps1|LOC100044341	NM_032000	Mm.30466///Mm.442375///Mm.30466///Mm.442375///Mm.30466///Mm.442375///Mm.30466///Mm.442375///Mm.30466///Mm.442375///Mm.30466///Mm.442375
10427997	2.21668	Down	RIKEN cDNA 5730557B15 gene	BC100327	5730557B15Rik	NM_027496	Mm.102470///Mm.102470///Mm.102470///Mm.102470///Mm.102470
10427918	3.31132	Down		BC052328	BC052328		Mm.266485///Mm.266485///Mm.266485
10427744	2.46736	Down	retinoic acid induced 14	BC052458	Rai14	NM_030690	Mm.212395///Mm.212395///Mm.212395
10427461	2.51842	Down	prostaglandin E receptor 4 (subtype EP4)	BC011193	Ptger4	NM_008965	Mm.18509///Mm.18509///Mm.18509
10427369	2.84152	Down	phosphodiesterase 1B, Ca2+-calmodulin dependent	BC058531	Pde1b	NM_008800	Mm.390792///Mm.390792///Mm.390792
10427336	7.1025	Down	NCK associated protein 1 like	BC037096	Nckap1l	NM_153505	Mm.30805///Mm.30805///Mm.30805
10426999	2.58928	Down	activin A receptor, type II-like 1	L48015	Acvrl1	NM_009612	Mm.279542///Mm.279542///Mm.279542
10426921	2.01129	Down	DAZ associated protein 2	AF085348	Dazap2	NM_011873	Mm.292530///Mm.292530///Mm.292530
10426479	2.01764	Down	transmembrane protein 16F	BC060732	Tmem16f	NM_175344	Mm.38087///Mm.38087///Mm.38087///Mm.38087
10426315	4.56828	Down	leucine-rich repeat kinase 2	AY792512	Lrrk2	NM_025730	Mm.37558///Mm.37558///Mm.37558///Mm.37558
10426261	2.88695	Down	SH3/ankyrin domain gene 3	AJ245904	Shank3	NM_021423	Mm.146855///Mm.146855///Mm.146855///Mm.146855///Mm.146855
10425866	2.50921	Down	parvin, gamma	BC011200	Parvg	NM_022321	Mm.251356///Mm.251356///Mm.251356
10425852	2.2943	Down	parvin, beta	AF237770	Parvb	NM_133167	Mm.323892///Mm.323892///Mm.323892
10425092	6.26826	Down	pleckstrin homology, Sec7 and coiled/coil domains 4	AF079972	Pscd4	NM_028195	Mm.32911///Mm.32911///Mm.32911///Mm.32911
10425066	10.3696	Down	colony stimulating factor 2 receptor, beta, low-affinity (granulocyte-macrophage)	BC113202	Csf2rb	NM_007780	Mm.235324///Mm.235324///Mm.235324
10425053	7.92379	Down	neutrophil cytosolic factor 4	AB002665	Ncf4	NM_008677	Mm.2068///Mm.2068///Mm.2068
10424781	2.14883	Down	glutamate receptor, ionotropic, N-methyl D-aspartate-associated protein 1 (glutamate binding)	AF182040	Grina	NM_023168	Mm.41665///Mm.41665///Mm.41665
10424695	4.38367	Down	GPI-anchored HDL-binding protein 1	BC061225	Gpihbp1	NM_026730	Mm.46367///Mm.46367///Mm.46367
10424683	4.0459	Down	lymphocyte antigen 6 complex, locus G		Ly6g
10424676	2.1179	Down	lymphocyte antigen 6 complex, locus E	BC005684	Ly6e	NM_008529	Mm.788///Mm.788///Mm.788///Mm.788
10424584	2.28069	Down	DENN/MADD domain containing 3	BC132389	Dennd3	NM_001081066	Mm.322557///Mm.322557///Mm.322557
10423825	2.64317	Down	frizzled homolog 6 (Drosophila)	BC026150	Fzd6	NM_008056	Mm.4769///Mm.4769///Mm.4769
10422760	8.66357	Down	FYN binding protein	AF061744	Fyb	NM_011815	Mm.170905///Mm.170905///Mm.170905///Mm.170905
10422496	2.35263	Down	Epstein-Barr virus induced gene 2	BC052868	Ebi2	NM_183031	Mm.265618///Mm.265618///Mm.265618
10422493	2.09436	Down	G protein-coupled receptor 18	BC034872	Gpr18	NM_182806	Mm.37405///Mm.37405///Mm.37405
10422075	2.28283	Down	MYC binding protein 2	AY325887	Mycbp2	NM_207215	Mm.6478///Mm.6478///Mm.6478
10421810	2.87034	Down	RIKEN cDNA 1190002H23 gene	AF276981	1190002H23Rik	NM_025427	Mm.29811///Mm.29811///Mm.29811
10421774	2.7076	Down	diacylglycerol kinase, eta	BC127173	Dgkh	NM_001081336	Mm.379505///Mm.379505///Mm.379505///Mm.379505
10421648	2.12918	Down	solute carrier family 25, member 30	BC022676	Slc25a30	NM_026232	Mm.46067///Mm.46067///Mm.46067
10421557	2.48304	Down	integral membrane protein 2B	U76253	Itm2b	NM_008410	Mm.4266///Mm.4266///Mm.4266
10421526	3.75955	Down	retinoblastoma 1	BC096525	Rb1	NM_009029	Mm.273862///Mm.273862///Mm.273862
10420957	4.07385	Down	PTK2 protein tyrosine kinase 2 beta	BC024594	Ptk2b	NM_172498	Mm.21613///Mm.21613///Mm.21613///Mm.21613///Mm.21613
10420668	2.58074	Down
10420503	2.24603	Down	SET domain, bifurcated 2		Setdb2	NM_001081024	Mm.217269///Mm.217269///Mm.217269
10420488	3.58823	Down	DNA segment, Chr 14, ERATO Doi 668, expressed	BC145673|BC110663	D14Ertd668e		Mm.205022///Mm.205022///Mm.205022///Mm.205022
10420171	2.42069	Down	adenylate cyclase 4	BC015299	Adcy4	NM_080435	Mm.287010///Mm.287010///Mm.287010
10419744	3.43492	Down	solute carrier family 7 (cationic amino acid transporter, y+ system), member 7	BC014709	Slc7a7	NM_011405	Mm.142455///Mm.142455///Mm.142455
10419288	2.72134	Down	GTP cyclohydrolase 1	BC005643	Gch1	NM_008102	Mm.10651///Mm.10651///Mm.10651
10419240	3.99991	Down	DDHD domain containing 1	DQ272481	Ddhd1	NM_001042719|NM_176845|NM_001039106	Mm.121918///Mm.121918///Mm.121918///Mm.121918///Mm.121918///Mm.121918///Mm.121918///Mm.121918
10418868	5.20319	Down
10418848	3.71219	Down	WD repeat and FYVE domain containing 4	AK173214	Wdfy4		Mm.441233///Mm.441233
10418506	3.06387	Down	stabilin 1	AF290914	Stab1	NM_138672	Mm.220821///Mm.220821///Mm.220821
10418410	4.1369	Down	protein kinase C, delta	AB011812	Prkcd	NM_011103	Mm.2314///Mm.2314///Mm.2314///Mm.2314///Mm.2314///Mm.2314///Mm.2314///Mm.2314///Mm.2314///Mm.2314///Mm.2314
10416837	23.8723	Down	immunoresponsive gene 1	L38281	Irg1	NM_008392	Mm.4662///Mm.4662///Mm.4662
10416700	3.31729	Down	protocadherin 17	BC079850	Pcdh17	NM_001013753	Mm.153643///Mm.153643///Mm.153643
10416689	2.45506	Down	olfactomedin 4		Olfm4	NM_001030294	Mm.26456///Mm.26456///Mm.26456
10416566	2.77025	Down	epithelial stromal interaction 1 (breast)	AY239224	Epsti1	NM_029495|NM_178825	Mm.68134///Mm.68134///Mm.68134///Mm.68134
10416437	6.28719	Down	lymphocyte cytosolic protein 1	BC022943	Lcp1	NM_008879	Mm.153911///Mm.153911///Mm.153911///Mm.153911///Mm.153911///Mm.153911
10416371	3.98661	Down	purinergic receptor P2Y, G-protein coupled, 5	BC047931	P2ry5	NM_175116	Mm.390681///Mm.390681///Mm.390681
10415844	3.43023	Down	cathepsin B	BC006656	Ctsb	NM_007798	Mm.236553///Mm.472420///Mm.236553///Mm.472420///Mm.236553///Mm.472420
10415778	2.11296	Down	ADP-ribosylation factor-like 11	BC064093	Arl11	NM_177337	Mm.206566///Mm.206566///Mm.206566
10415725	2.03032	Down	spermatogenesis associated 13	AK220313	Spata13		Mm.149776///Mm.149776
10414548	5.85917	Down	ribonuclease, RNase A family, 6	BC094892	Rnase6	NM_030098	Mm.103835///Mm.103835///Mm.103835
10414360	3.23798	Down	lectin, galactose binding, soluble 3	BC132328	Lgals3	NM_010705	Mm.248615///Mm.248615///Mm.248615
10414102	3.96786	Down	multimerin 2	BC145845	Mmrn2	NM_153127	Mm.272673///Mm.272673///Mm.272673
10413813	2.16288	Down	UDP-N-acetyl-alpha-D-galactosamine:polypeptide N-acetylgalactosaminyltransferase-like 2	BC133711	Galntl2	NM_030166	Mm.40681///Mm.40681///Mm.40681
10413419	4.24374	Down	Rho guanine nucleotide exchange factor (GEF) 3	BC012262	Arhgef3	NM_027871	Mm.248606///Mm.248606///Mm.248606///Mm.248606
10412921	2.46734	Down	nidogen 2	AY074820	Nid2	NM_008695	Mm.20348///Mm.20348///Mm.20348
10412345	6.93063	Down	poly (ADP-ribose) polymerase family, member 8	BC021881	Parp8	NM_001081009	Mm.274466///Mm.274466///Mm.274466
10412123	3.38988	Down	neutrophil cytosolic factor 2	BC003730|DQ449939	Ncf2		Mm.270307///Mm.270307
10412100	2.46395	Down	mitogen-activated protein kinase kinase kinase 1	AF117340	Map3k1	NM_011945	Mm.15918///Mm.15918///Mm.15918///Mm.15918
10412078	3.64973	Down	RIKEN cDNA 9830130M13 gene | hypothetical protein LOC100044914	BC118005	9830130M13Rik|LOC100044914	NM_177713	Mm.30533///Mm.30533///Mm.30533
10412038	2.52325	Down	zinc finger, SWIM domain containing 6	BC021311|AK122528	Zswim6		Mm.433838///Mm.433838///Mm.433838///Mm.433838
10411595	4.79851	Down	NLR family, apoptosis inhibitory protein 2	AF135490	Naip2	NM_010872|NM_001126182	Mm.89961///Mm.89961///Mm.89961///Mm.89961
10411373	3.84484	Down	hexosaminidase B	U07633	Hexb	NM_010422	Mm.27816///Mm.27816///Mm.27816
10411235	2.18425	Down	IQ motif containing GTPase activating protein 2		Iqgap2	NM_027711	Mm.38878///Mm.38878
10409567	7.58409	Down	TRAF-interacting protein with forkhead-associated domain, family member B	BC031130	Tifab	NM_145976	Mm.116697///Mm.116697///Mm.116697
10409502	4.27281	Down	docking protein 3	BC116922	Dok3	NM_013739	Mm.33910///Mm.33910///Mm.33910
10409376	2.61702	Down	hexokinase 3	BC117860	Hk3	NM_001033245	Mm.267479///Mm.267479///Mm.267479
10409240	4.96387	Down	sema domain, immunoglobulin domain (Ig), transmembrane domain (TM) and short cytoplasmic domain, (semaphorin) 4D	BC049780	Sema4d	NM_013660	Mm.33903///Mm.33903///Mm.33903///Mm.33903///Mm.33903
10409170	2.65833	Down	FYVE, RhoGEF and PH domain containing 3	AF017369	Fgd3	NM_015759	Mm.291089///Mm.291089///Mm.291089///Mm.291089///Mm.291089
10408850	2.51979	Down	neural precursor cell expressed, developmentally down-regulated gene 9	BC053713	Nedd9	NM_001111324|NM_017464	Mm.288980///Mm.288980///Mm.288980///Mm.288980
10408693	5.5606	Down	coagulation factor XIII, A1 subunit	BC040274	F13a1	NM_028784	Mm.235105///Mm.235105///Mm.235105///Mm.235105///Mm.235105
10407985	8.36618	Down	G protein-coupled receptor 141	BC125585	Gpr141	NM_181754	Mm.239268///Mm.239268///Mm.239268
10407803	2.55942	Down	G protein-coupled receptor 137B	BC003212	Gpr137b	NM_031999	Mm.379269///Mm.379269///Mm.379269///Mm.379269
10407792	2.64625	Down	G protein-coupled receptor 137B, pseudogene | G protein-coupled receptor 137B	AF154337|BC003212	Gpr137b-ps	NR_003568
10407591	2.39272	Down	cholinergic receptor, muscarinic 3, cardiac	BC129892	Chrm3	NM_033269	Mm.342315///Mm.342315///Mm.342315
10407481	2.11911	Down	phosphofructokinase, platelet	BC006926	Pfkp	NM_019703	Mm.273874///Mm.273874///Mm.273874
10407327	2.62202	Down	embigin	BC014858	Emb	NM_010330	Mm.274926///Mm.274926///Mm.274926
10407281	3.76623	Down	endothelial cell-specific molecule 1 | similar to Endothelial cell-specific molecule 1 precursor (ESM-1 secretory protein) (ESM-1)	BC051919	Esm1|LOC632677	NM_023612	Mm.38929///Mm.38929///Mm.38929
10406928	6.35236	Down	CD180 antigen	D37797	Cd180	NM_008533	Mm.373974///Mm.373974///Mm.373974
10406905	2.25001	Down	coiled-coil domain containing 125	BC085249	Ccdc125	NM_183115	Mm.23977///Mm.23977///Mm.23977
10406859	2.11921	Down	zinc finger protein 366	BC070399	Zfp366	NM_001004149	Mm.343207///Mm.343207///Mm.343207
10406452	2.76821	Down		AY344585	ENSMUSG00000074792
10406434	3.47888	Down	myocyte enhancer factor 2C	BC037731	Mef2c	NM_025282	Mm.24001///Mm.24001///Mm.24001///Mm.24001///Mm.24001
10406407	3.4718	Down	arrestin domain containing 3	BC054844	Arrdc3	NM_001042591	Mm.423137///Mm.423137///Mm.423137
10406270	2.4224	Down	glutaredoxin	AF109314	Glrx	NM_053108	Mm.25844///Mm.25844///Mm.25844
10406254	2.44049	Down	elongation factor RNA polymerase II 2	BC006925	Ell2	NM_138953	Mm.21288///Mm.21288///Mm.21288
10405587	3.83105	Down	transforming growth factor, beta induced	L19932	Tgfbi	NM_009369	Mm.14455///Mm.14455///Mm.14455
10405432	2.01099	Down	regulator of G-protein signaling 14	BC030321	Rgs14	NM_016758	Mm.1426///Mm.1426///Mm.1426
10405216	7.16435	Down	spleen tyrosine kinase	BC065121	Syk	NM_011518	Mm.375031///Mm.375031///Mm.375031
10404996	2.17901	Down	ninjurin 1	U91513	Ninj1	NM_013610	Mm.18503///Mm.18503///Mm.18503
10404965	2.31716	Down	ring finger protein 144B	BC025007	Rnf144b	NM_146042	Mm.287609///Mm.287609///Mm.287609///Mm.287609
10404874	2.49372	Down	myosin regulatory light chain interacting protein	BC010206	Mylip	NM_153789|NM_181043	Mm.212855///Mm.212855///Mm.212855///Mm.212855
10404840	6.1056	Down	CD83 antigen	BC107344	Cd83	NM_009856	Mm.57175///Mm.57175///Mm.57175
10404702	2.56693	Down	glucosaminyl (N-acetyl) transferase 2, I-branching enzyme	BC094572	Gcnt2	NM_023887|NM_133219|NM_008105	Mm.314757///Mm.314757///Mm.314757///Mm.314757///Mm.314757///Mm.314757///Mm.314757
10404606	11.4715	Down	lymphocyte antigen 86	BC096414	Ly86	NM_010745	Mm.2639///Mm.2639///Mm.2639
10404152	3.46501	Down	RIKEN cDNA 6330500D04 gene		6330500D04Rik	NM_029679|NM_001080381|NM_178658	Mm.217319///Mm.217319///Mm.217319///Mm.217319///Mm.217319///Mm.217319///Mm.217319///Mm.217319
10404132	3.08003	Down	cytidine monophospho-N-acetylneuraminic acid hydroxylase	AB061276	Cmah	NM_001111110|NM_007717	Mm.8396///Mm.8396///Mm.8396///Mm.8396///Mm.8396
10404059	2.45758	Down	histone cluster 1, H1c	BC089604|AK180013	Hist1h1c	NM_015786	Mm.193539///Mm.193539///Mm.193539///Mm.193539
10403871	2.55631	Down	acyloxyacyl hydrolase	AF018172	Aoah	NM_012054	Mm.314046///Mm.314046///Mm.314046///Mm.314046
10403842	3.19542	Down	engulfment and cell motility 1, ced-12 homolog (C. elegans)	AK220253	Elmo1	NM_080288|NM_198093	Mm.342392///Mm.342392///Mm.342392///Mm.342392///Mm.342392
10403604	3.45054	Down	lysosomal trafficking regulator	U70015	Lyst	NM_010748	Mm.342337///Mm.342337///Mm.342337///Mm.342337
10403558	2.20505	Down	ERO1-like beta (S. cerevisiae)	BC058721	Ero1lb	NM_026184	Mm.358706///Mm.358706///Mm.358706
10403291	3.29655	Down	aldo-keto reductase family 1, member C14	BC013482	Akr1c14	NM_134072	Mm.26838///Mm.26838///Mm.26838
10403018	2.02454	Down	Ig mu chain V region AC38 205.12 | immunoglobulin heavy chain Ia | immunoglobulin heavy chain (J558 family) | immunoglobulin heavy chain 2 (serum IgA) | immunoglobulin heavy chain 1a (serum IgG2a) | Immunoglobulin heavy chain (gamma polypeptide) | similar to immunoglobulin mu-chain | similar to Ig heavy chain V region 3 precursor | Ig heavy chain variable region | similar to Ig heavy chain V regi…		IghmAC38.205.12|Igh-Ia|Igh-VJ558|Igh-2|Igh-1a|Ighg|LOC544903|LOC544910|LOC634275|LOC675659		Mm.246497///Mm.305376///Mm.313447///Mm.313465///Mm.313480///Mm.313488///Mm.335723///Mm.342187///Mm.351752///Mm.379534///Mm.390523///Mm.390541///Mm.423002///Mm.423936///Mm.425757///Mm.425779///Mm.427704///Mm.435577///Mm.436242///Mm.436336///Mm.436337///Mm.246497///Mm.305376///Mm.313447///Mm.313465///Mm.313480///Mm.313488///Mm.335723///Mm.342187///Mm.351752///Mm.379534///Mm.390523///Mm.390541///Mm.…
10402808	2.26435	Down	jagged 2	AF038572	Jag2	NM_010588	Mm.28541///Mm.186146///Mm.28541///Mm.186146///Mm.28541///Mm.186146
10402800	5.77664	Down	G protein-coupled receptor 132	BC120522	Gpr132	NM_019925	Mm.20455///Mm.20455///Mm.20455
10402347	6.68655	Down	interferon, alpha-inducible protein 27	BC100588	Ifi27	NM_029803	Mm.271275///Mm.271275///Mm.271275
10401238	2.2406	Down	zinc finger protein 36, C3H type-like 1	M58566	Zfp36l1	NM_007564	Mm.235132///Mm.235132///Mm.235132
10401160	2.78778	Down	RIKEN cDNA 6330442E10 gene	BC066067|BC079613|BC057677	6330442E10Rik		Mm.341747///Mm.341747///Mm.341747///Mm.341747
10400510	2.44582	Down	C-type lectin domain family 14, member a	BC019452	Clec14a	NM_025809	Mm.280563///Mm.280563///Mm.280563
10400405	3.66917	Down	nuclear factor of kappa light polypeptide gene enhancer in B-cells inhibitor, alpha	BC046754	Nfkbia	NM_010907	Mm.170515///Mm.170515///Mm.170515
10400023	4.9848	Down	tetraspanin 13	BC018317	Tspan13	NM_025359	Mm.254663///Mm.254663///Mm.254663
10400006	3.9136	Down	aryl-hydrocarbon receptor	AF405565	Ahr	NM_013464	Mm.30155///Mm.341377///Mm.30155///Mm.341377///Mm.30155///Mm.341377///Mm.30155///Mm.341377///Mm.30155///Mm.341377
10399924	4.08913	Down	phosphoinositide-3-kinase, catalytic, gamma polypeptide	BC051246	Pik3cg	NM_020272	Mm.101369///Mm.101369///Mm.101369///Mm.101369///Mm.101369
10399710	9.3472	Down	radical S-adenosyl methionine domain containing 2	BC057868	Rsad2	NM_021384	Mm.24045///Mm.24045///Mm.24045
10399696	2.4964	Down	ring finger protein 144A	BC030187	Rnf144a	NM_001081977|NM_080563	Mm.214932///Mm.214932///Mm.214932///Mm.214932///Mm.214932
10399691	2.45691	Down	inhibitor of DNA binding 2	BC006921	Id2	NM_010496	Mm.465809///Mm.465809///Mm.465809
10399605	2.30713	Down	a disintegrin and metallopeptidase domain 17	BC114999	Adam17	NM_009615	Mm.27681///Mm.27681///Mm.27681///Mm.27681
10399470	3.17115	Down	tribbles homolog 2 (Drosophila)	BC037387	Trib2	NM_144551	Mm.266679///Mm.266679///Mm.266679
10399265	2.30183	Down	nuclear receptor coactivator 1 | similar to Nuclear receptor coactivator 1 (NCoA-1) (Steroid receptor coactivator 1) (SRC-1) (Nuclear receptor coactivator protein 1) (mNRC-1)	BC080866	Ncoa1|LOC100044566	NM_010881	Mm.301039///Mm.301039///Mm.301039///Mm.301039
10399148	2.81747	Down	Rap guanine nucleotide exchange factor (GEF) 5	BC046627	Rapgef5	NM_175930	Mm.227642///Mm.227642///Mm.227642///Mm.227642
10398907	12.4075	Down	phospholipase D family, member 4	BC058565	Pld4	NM_178911	Mm.203915///Mm.203915///Mm.203915
10397645	4.62	Down	G-protein coupled receptor 65	U39827	Gpr65	NM_008152	Mm.378924///Mm.378924///Mm.378924
10396919	2.1352	Down	RIKEN cDNA 4933426M11 gene	BC040401	4933426M11Rik		Mm.341776///Mm.341776///Mm.341776
10396831	6.9027	Down	arginase type II	AF032466	Arg2	NM_009705	Mm.3506///Mm.3506///Mm.3506
10396419	3.81407	Down
10396402	4.14992	Down	protein kinase C, eta	BC031121	Prkch	NM_008856	Mm.341677///Mm.341677///Mm.341677
10395466	3.50108	Down	dedicator of cytokinesis 4		Dock4	NM_172803	Mm.341423///Mm.341423///Mm.341423
10395039	4.19786	Down	cytidine monophosphate (UMP-CMP) kinase 2, mitochondrial	BC027329	Cmpk2	NM_020557	Mm.271839///Mm.271839///Mm.271839///Mm.271839///Mm.271839
10394593	2.57921	Down	DNA segment, Chr 12, ERATO Doi 553, expressed	BC052465|BC049664	D12Ertd553e		Mm.440802///Mm.440802///Mm.440802///Mm.440802
10394288	2.1051	Down	intersectin 2	AF132479	Itsn2	NM_011365	Mm.341204///Mm.341204///Mm.341204///Mm.341204
10394054	2.54961	Down	CD7 antigen	BC024376	Cd7	NM_009854	Mm.4100///Mm.4100///Mm.4100
10393544	2.31092	Down	pleckstrin homology, Sec7 and coiled-coil domains 1	BC057974	Pscd1	NM_011180|NM_001112699|NM_001112700	Mm.86413///Mm.86413///Mm.86413///Mm.86413///Mm.86413///Mm.86413///Mm.86413///Mm.86413///Mm.86413
10393341	3.11324	Down	rhomboid 5 homolog 2 (Drosophila)	BC052182	Rhbdf2	NM_172572	Mm.89695///Mm.89695///Mm.89695///Mm.89695///Mm.89695
10393058	2.15297	Down	H3 histone, family 3B | similar to H3 histone, family 3A	BC021768	H3f3b|LOC100045490|H3f3a	NM_008211	Mm.371563///Mm.371563///Mm.315189///Mm.371563///Mm.315189///Mm.371563
10392845	10.1099	Down	CD300 antigen like family member F	BC057864	Cd300lf	NM_145634	Mm.277387///Mm.277387///Mm.277387///Mm.277387///Mm.277387///Mm.277387
10392839	5.54243	Down	CD300e antigen	BC034097	Cd300e	NM_172050	Mm.222667///Mm.222667///Mm.222667
10392834	4.8141	Down	CMRF-35-like molecule 3-like | CMRF-35-like molecule 3 | CLM3-like	AY457049	RP23-331L12.7|RP23-331L12.8|RP23-331L12.6	NM_001101657|NM_199201	Mm.424732///Mm.424732///Mm.424732///Mm.424732
10392825	4.8664	Down	CMRF-35-like molecule 3-like | CMRF-35-like molecule 3 | CLM3-like	BC119352	RP23-331L12.7|RP23-331L12.8|RP23-331L12.6	NM_001101657|NM_199201	Mm.424732///Mm.424732///Mm.424732///Mm.424732
10392822	3.1449	Down
10392815	6.7565	Down	cDNA sequence AF251705 | CD300A antigen	AF251705|AF251704	AF251705|Cd300a	NM_134158	Mm.2699///Mm.2699///Mm.2699///Mm.294439///Mm.2699
10392808	6.90732	Down	RIKEN cDNA 4732429D16 gene	BC019814	4732429D16Rik	NM_145437	Mm.275986///Mm.275986///Mm.275986
10392796	5.44328	Down	CD300 antigen like family member B	AY996128	Cd300lb	NM_199221	Mm.185355///Mm.185355///Mm.185355///Mm.185355
10392560	3.27135	Down	ATP-binding cassette, sub-family A (ABC1), member 9	AF491299	Abca9	NM_147220	Mm.291459///Mm.291459///Mm.291459///Mm.291459
10392440	2.65674	Down	solute carrier family 16 (monocarboxylic acid transporters), member 6	BC017129	Slc16a6	NM_001029842|NM_134038	Mm.265874///Mm.265874///Mm.265874///Mm.265874///Mm.265874
10392221	4.18336	Down	platelet/endothelial cell adhesion molecule 1	BC008519	Pecam1	NM_008816|NM_001032378	Mm.343951///Mm.343951///Mm.343951///Mm.343951///Mm.343951///Mm.343951///Mm.343951///Mm.343951
10392177	2.83621	Down	intercellular adhesion molecule 2	BC039128	Icam2	NM_010494	Mm.394///Mm.394///Mm.394///Mm.394///Mm.394///Mm.394
10391895	2.71998	Down	Rho GTPase activating protein 27	BC096671	Arhgap27	NM_133715	Mm.397197///Mm.397197///Mm.397197///Mm.397197
10391870	2.02148	Down	mitogen-activated protein kinase kinase kinase 14 | RIKEN cDNA 1700028N14 gene	AF143094	Map3k14|1700028N14Rik	NM_016896	Mm.158981///Mm.158981///Mm.158981///Mm.158981
10391577	2.40327	Down	histone deacetylase 5	BC058554	Hdac5	NM_001077696|NM_010412	Mm.22665///Mm.22665///Mm.22665///Mm.22665///Mm.22665///Mm.22665
10391513	2.50755	Down	dual specificity phosphatase 3 (vaccinia virus phosphatase VH1-related)	AF280809	Dusp3	NM_028207	Mm.196295///Mm.196295///Mm.196295///Mm.196295///Mm.196295
10391504	2.54267	Down	mesenchyme homeobox 1	BC011082	Meox1	NM_010791	Mm.3404///Mm.3404///Mm.3404///Mm.3404
10391286	2.75449	Down	signal transducer and activator of transcription 5B	BC024319	Stat5b	NM_001113563|NM_011489	Mm.34064///Mm.34064///Mm.34064///Mm.34064///Mm.34064
10391207	3.05283	Down	DEXH (Asp-Glu-X-His) box polypeptide 58	AF316999	Dhx58	NM_030150	Mm.271830///Mm.271830///Mm.271830
10390535	4.29361	Down	ADP-ribosylation factor-like 5C	BC065791	Arl5c	NM_207231	Mm.277896///Mm.277896///Mm.277896///Mm.277896
10390186	5.41807	Down	ABI gene family, member 3	BC058260	Abi3	NM_025659	Mm.129228///Mm.133075///Mm.129228///Mm.133075///Mm.129228///Mm.133075///Mm.129228///Mm.133075
10389222	11.4357	Down	chemokine (C-C motif) ligand 6	M58004	Ccl6	NM_009139	Mm.137///Mm.137///Mm.137
10389214	11.0222	Down	chemokine (C-C motif) ligand 9	U15209	Ccl9	NM_011338	Mm.416125///Mm.416125///Mm.416125///Mm.416125
10389207	5.2272	Down	chemokine (C-C motif) ligand 5	BC033508	Ccl5	NM_013653	Mm.284248///Mm.284248///Mm.284248
10389143	6.49479	Down	schlafen 8	AY261798	Slfn8	NM_181545	Mm.462462///Mm.462462///Mm.462462///Mm.462462///Mm.462462
10388996	2.79986	Down	cytokine receptor-like factor 3	AF046060	Crlf3	NM_018776	Mm.272093///Mm.272093///Mm.272093///Mm.272093
10388958	7.90118	Down	ecotropic viral integration site 2a | ecotropic viral integration site 2b	M34897|BC017548	Evi2a|Evi2b	NM_001033711|NM_146023|NM_010161|NM_001077496	Mm.439665///Mm.439665///Mm.439665///Mm.439665///Mm.439665
10388310	2.88678	Down	GTPase activating RANGAP domain-like 4	BC107388	Garnl4	NM_001015046	Mm.425690///Mm.425690///Mm.425690///Mm.425690///Mm.425690///Mm.425690
10388194	2.03316	Down	spinster homolog 2 (Drosophila)	BC025823|BC011467	Spns2		Mm.212812///Mm.212812///Mm.212812///Mm.212812
10387890	4.19351	Down	chemokine (C-X-C motif) ligand 16	BC019961	Cxcl16	NM_023158	Mm.425692///Mm.425692///Mm.425692
10387797	2.88234	Down	B-cell CLL/lymphoma 6, member B	AB011665	Bcl6b	NM_007528	Mm.12930///Mm.12930///Mm.12930
10387536	6.22543	Down	CD68 antigen	BC021637	Cd68	NM_009853	Mm.15819///Mm.15819///Mm.15819///Mm.15819
10387372	2.69396	Down	jumonji domain containing 3	BC075632	Jmjd3	NM_001017426	Mm.261201///Mm.261201///Mm.261201
10387368	2.53168	Down	transmembrane protein 88	BC120912	Tmem88	NM_025915	Mm.390406///Mm.390406///Mm.390406
10387201	2.59573	Down	Rho guanine nucleotide exchange factor (GEF) 15	BC089365	Arhgef15	NM_177566	Mm.376147///Mm.376147///Mm.376147///Mm.376147
10387180	2.11023	Down	nuclear distribution gene E-like homolog 1 (A. nidulans)	BC046796	Ndel1	NM_023668	Mm.31979///Mm.31979///Mm.31979///Mm.31979///Mm.31979
10385542	2.03712	Down	butyrophilin-like 9	AY177687	Btnl9	NM_172793	Mm.130787///Mm.130787///Mm.130787///Mm.130787
10385533	3.89856	Down	T-cell specific GTPase | predicted gene, OTTMUSG00000005523	BC085259|BC022776	Tgtp|OTTMUSG00000005523	NM_011579	Mm.15793///Mm.15793///Mm.452174///Mm.15793///Mm.452174///Mm.15793///Mm.15793
10385526	8.8196	Down	predicted gene, EG432555 | RIKEN cDNA 9930111J21 gene | protease (prosome, macropain) 28 subunit beta B, pseudogene | interferon-inducible GTPase family member	BC119805|BC022776	EG432555|9930111J21Rik|Psme2b-ps|RP23-269N23.3	NM_001024230	Mm.450383///Mm.452996///Mm.454033///Mm.452996///Mm.454033///Mm.440151///Mm.441306///Mm.452996///Mm.454033///Mm.450383///Mm.450383
10385518	3.41985	Down	T-cell specific GTPase | predicted gene, OTTMUSG00000005523	BC085259|BC022776	Tgtp|OTTMUSG00000005523	NM_011579	Mm.15793///Mm.15793///Mm.452174///Mm.15793///Mm.452174///Mm.15793///Mm.15793
10385513	7.96757	Down	predicted gene, EG432555 | RIKEN cDNA 9930111J21 gene | protease (prosome, macropain) 28 subunit beta B, pseudogene | interferon-inducible GTPase family member	BC119805|BC022776	EG432555|9930111J21Rik|Psme2b-ps|RP23-269N23.3	NM_001024230	Mm.450383///Mm.452996///Mm.454033///Mm.452996///Mm.454033///Mm.450383///Mm.440151///Mm.441306///Mm.452996///Mm.454033///Mm.450383
10385511	2.13965	Down	proteasome (prosome, macropain) 28 subunit, beta | protease (prosome, macropain) 28 subunit beta B, pseudogene	D87910|BC005680	Psme2|Psme2b-ps	NM_011190|NM_001029855	Mm.371573///Mm.371573///Mm.371573///Mm.371573///Mm.440151///Mm.371573
10385500	2.59846	Down	immunity-related GTPase family, M	U19119	Irgm	NM_008326	Mm.29938///Mm.29938///Mm.29938///Mm.29938
10385118	5.62557	Down	dedicator of cyto-kinesis 2	AY027438	Dock2	NM_033374	Mm.380679///Mm.380679///Mm.380679///Mm.380679///Mm.380679///Mm.380679
10384797	2.03868	Down	coiled-coil domain containing 85A	AK173298	Ccdc85a	NM_181577	Mm.93759///Mm.93759///Mm.93759///Mm.93759///Mm.93759///Mm.93759
10384725	8.0956	Down	reticuloendotheliosis oncogene	BC139770	Rel	NM_009044	Mm.4869///Mm.4869///Mm.4869
10384522	2.16614	Down	ARP2 actin-related protein 2 homolog (yeast)	BC027799	Actr2	NM_146243	Mm.259045///Mm.259045///Mm.259045
10384458	13.8802	Down	pleckstrin	AF073294	Plek	NM_019549	Mm.98232///Mm.98232///Mm.98232///Mm.98232
10384154	6.38094	Down	myosin IG	BC113755	Myo1g	NM_178440	Mm.239554///Mm.239554///Mm.239554///Mm.239554
10383799	2.79623	Down	transcobalamin 2	AF090686	Tcn2	NM_015749	Mm.20948///Mm.20948///Mm.20948///Mm.20948///Mm.20948///Mm.20948///Mm.20948///Mm.20948///Mm.20948
10383502	5.54281	Down	solute carrier family 16 (monocarboxylic acid transporters), member 3	BC046525	Slc16a3	NM_001038653|NM_030696|NM_001038654	Mm.28632///Mm.28632///Mm.28632///Mm.28632///Mm.28632///Mm.28632
10383233	3.14656	Down	ring finger protein 213 | hypothetical LOC672511	AK173199	Rnf213|LOC672511		Mm.133342///Mm.425701
10383214	3.11275	Down	ring finger protein 213 | hypothetical LOC672511	AK173199	Rnf213|LOC672511		Mm.133342///Mm.425701
10383212	3.12503	Down			LOC672511
10383210	2.97902	Down			LOC672511
10383208	3.37347	Down			LOC672511
10383206	3.5908	Down			LOC672511
10383204	3.33161	Down			LOC672511
10383202	3.5618	Down			LOC672511
10383200	3.26085	Down			LOC672511
10383198	3.69418	Down			LOC672511
10383196	3.25485	Down			LOC672511
10383194	2.95221	Down			LOC672511
10383192	3.03911	Down			LOC672511
10383168	3.83283	Down			LOC672511		Mm.425701///Mm.425701
10383152	3.91392	Down			LOC672511
10382956	2.42789	Down	transmembrane channel-like 8	AY263160	Tmc8	NM_181856	Mm.116675///Mm.116675///Mm.116675///Mm.116675
10382462	2.80133	Down	solute carrier family 9 (sodium/hydrogen exchanger), member 3 regulator 1	BC085141	Slc9a3r1	NM_012030	Mm.27842///Mm.27842///Mm.27842
10382438	5.54963	Down	CD300A antigen	AB091765	Cd300a	NM_170758	Mm.294439///Mm.294439///Mm.294439///Mm.294439
10382321	5.13332	Down	potassium inwardly-rectifying channel, subfamily J, member 2	AF021136	Kcnj2	NM_008425	Mm.4951///Mm.4951///Mm.4951
10382106	11.0905	Down	gene model 885, (NCBI)		Gm885
10381962	6.47697	Down	angiotensin I converting enzyme (peptidyl-dipeptidase A) 1	BC110362	Ace	NM_207624|NM_009598	Mm.754///Mm.754///Mm.754///Mm.754///Mm.754
10381708	5.09519	Down	formin-like 1	AF006466	Fmnl1	NM_019679|NM_001077698	Mm.138913///Mm.138913///Mm.138913///Mm.138913///Mm.138913///Mm.138913
10381514	4.11339	Down	CD300 antigen like family member G	AB243063	Cd300lg	NM_027987	Mm.266885///Mm.266885///Mm.266885///Mm.266885///Mm.266885
10381445	3.30393	Down	transmembrane protein 106A	BC022145	Tmem106a	NM_144830	Mm.280559///Mm.280559///Mm.280559///Mm.280559///Mm.280559
10381298	2.78649	Down	receptor (calcitonin) activity modifying protein 2	BC051201	Ramp2	NM_019444	Mm.260698///Mm.260698///Mm.260698///Mm.260698
10380571	5.8818	Down	guanine nucleotide binding protein (G protein), gamma transducing activity polypeptide 2	BC061005	Gngt2	NM_023121|NM_001038664	Mm.46299///Mm.46299///Mm.46299///Mm.46299///Mm.46299///Mm.46299///Mm.46299///Mm.46299///Mm.46299///Mm.46299
10380260	2.40518	Down	tripartite motif-containing 25	BC006908	Trim25	NM_009546	Mm.248445///Mm.248445///Mm.248445///Mm.248445///Mm.248445///Mm.248445///Mm.248445
10380067	2.33536	Down	septin 4	BC055101	2010-09-04	NM_011129	Mm.2214///Mm.2214///Mm.2214///Mm.2214///Mm.2214///Mm.2214///Mm.2214///Mm.2214///Mm.2214///Mm.2214
10380065	2.68008	Down	U3B small nuclear RNA 1 | U3B small nuclear RNA 4 | U3B small nuclear RNA 3		Rnu3b1|Rnu3b4|Rnu3b3	NR_004415|NR_002843|NR_004416
10380063	2.68028	Down	U3B small nuclear RNA 1 | U3B small nuclear RNA 4 | U3B small nuclear RNA 3		Rnu3b1|Rnu3b4|Rnu3b3	NR_004415|NR_002843|NR_004416
10380061	2.68327	Down	U3B small nuclear RNA 1 | U3B small nuclear RNA 4 | U3B small nuclear RNA 3		Rnu3b1|Rnu3b4|Rnu3b3	NR_004415|NR_002843|NR_004416
10380059	2.6784	Down	U3B small nuclear RNA 1 | U3B small nuclear RNA 4 | U3B small nuclear RNA 3		Rnu3b1|Rnu3b4|Rnu3b3	NR_004415|NR_002843|NR_004416
10379736	2.04872	Down	RIKEN cDNA 1100001G20 gene		1100001G20Rik	NM_183249	Mm.902///Mm.902
10379727	15.0085	Down		BC089618|BC038870	OTTMUSG00000000971	NM_001081957	Mm.24097///Mm.24097///Mm.24097///Mm.24097
10379646	3.23393	Down	schlafen 3	AF099974	Slfn3	NM_011409	Mm.290922///Mm.290922///Mm.290922
10379636	21.322	Down	schlafen 4	BC044865	Slfn4	NM_011410	Mm.38192///Mm.38192///Mm.38192
10379633	12.897	Down	schlafen 1	BC052869	Slfn1	NM_011407	Mm.10948///Mm.10948///Mm.10948
10379630	6.9042	Down	schlafen 2	AF099973	Slfn2	NM_011408	Mm.278689///Mm.278689///Mm.278689
10379615	10.9775	Down	schlafen 5	BC117909	Slfn5	NM_183201	Mm.42147///Mm.42147///Mm.42147///Mm.42147///Mm.42147
10379389	3.78859	Down	centaurin, alpha 2	BC027165	Centa2	NM_172133	Mm.341520///Mm.341520///Mm.341520
10378855	4.3427	Down	slingshot homolog 2 (Drosophila)		Ssh2
10378833	5.15599	Down	slingshot homolog 2 (Drosophila)	AB099288	Ssh2	NM_177710	Mm.440381///Mm.440381///Mm.440381///Mm.440381///Mm.440381
10378681	2.29649	Down	putative phosphatase	BC066112	RP23-136K12.4	NM_008916	Mm.1458///Mm.1458///Mm.1458
10378649	2.76729	Down	solute carrier family 43, member 2	AB120363	Slc43a2	NM_173388	Mm.11186///Mm.11186///Mm.11186///Mm.11186///Mm.11186
10378637	2.4042	Down	scavenger receptor class F, member 1	BC080288	Scarf1	NM_001004157	Mm.10486///Mm.10486///Mm.10486///Mm.10486
10378216	2.37425	Down	ATPase, Ca++ transporting, ubiquitous	BC017639	Atp2a3	NM_016745	Mm.6306///Mm.6306///Mm.6306///Mm.6306///Mm.6306///Mm.6306
10377938	2.05023	Down	enolase 3, beta muscle	BC013460	Eno3	NM_007933	Mm.251322///Mm.251322///Mm.251322///Mm.251322
10377804	3.32768	Down	arrestin, beta 2	BC016642	Arrb2	NM_145429	Mm.203747///Mm.203747///Mm.203747///Mm.203747///Mm.203747///Mm.203747///Mm.203747
10377782	3.40483	Down	macrophage galactose N-acetyl-galactosamine specific lectin 1	BC014811	Mgl1	NM_010796	Mm.252405///Mm.252405///Mm.252405///Mm.252405///Mm.252405///Mm.252405
10377286	3.2912	Down	phosphoinositide-3-kinase, regulatory subunit 6	BC028998	Pik3r6	NM_001081566|NM_001004435	Mm.234573///Mm.234573///Mm.234573///Mm.234573///Mm.234573
10377265	2.61334	Down	phosphoinositide-3-kinase, regulatory subunit 5, p101	BC128076	Pik3r5	NM_177320	Mm.244960///Mm.244960///Mm.244960
10376868	4.17875	Down	transient receptor potential cation channel, subfamily V, member 2	AB021665	Trpv2	NM_011706	Mm.288064///Mm.288064///Mm.288064///Mm.288064
10376796	2.26296	Down	GRB2-related adaptor protein	BC120674	Grap	NM_027817	Mm.202760///Mm.202760///Mm.202760
10376513	10.8047	Down	NLR family, pyrin domain containing 3	AY495376	Nlrp3	NM_145827	Mm.54174///Mm.54174///Mm.54174///Mm.54174///Mm.54174///Mm.54174
10376326	2.21443	Down	interferon gamma induced GTPase | interferon inducible GTPase 2	U53219|BC092054	Igtp|Iigp2	NM_018738|NM_019440	Mm.33902///Mm.458517///Mm.458517///Mm.458517///Mm.33902///Mm.33902///Mm.458517///Mm.458517
10376324	3.31802	Down	interferon-gamma-inducible p47 GTPase	DQ508487	Irgb10
10376208	3.82437	Down	GM2 ganglioside activator protein	U09816	Gm2a	NM_010299	Mm.287807///Mm.287807///Mm.287807
10375667	2.5997	Down	ring finger protein 130	AF171875	Rnf130	NM_021540	Mm.359004///Mm.359004///Mm.359004///Mm.359004
10375578	2.16616	Down	FMS-like tyrosine kinase 4	L07296	Flt4	NM_008029	Mm.3291///Mm.3291///Mm.3291
10375515	3.11861	Down	interferon gamma inducible protein 47 | olfactory receptor 56	BC009131|M63630	Ifi47|Olfr56	NM_008330|NM_010999	Mm.24769///Mm.24769///Mm.24769///Mm.24769///Mm.24769
10375360	3.1366	Down	early B-cell factor 1	L12147	Ebf1	NM_007897	Mm.439662///Mm.439662///Mm.439662///Mm.439662///Mm.439662
10375358	2.03792	Down	early B-cell factor 1		Ebf1		Mm.439662///Mm.439662
10375145	6.74923	Down	lymphocyte cytosolic protein 2	BC006948	Lcp2	NM_010696	Mm.265350///Mm.265350///Mm.265350///Mm.265350
10375083	4.42515	Down	serine/threonine kinase 10	BC096624	Stk10	NM_009288	Mm.8235///Mm.8235///Mm.8235
10374727	3.06793	Down	B-cell CLL/lymphoma 11A (zinc finger protein)	AF051525	Bcl11a	NM_016707	Mm.53687///Mm.53687///Mm.53687///Mm.53687///Mm.53687///Mm.53687
10374485	2.39423	Down	pellino 1	AF302503	Peli1	NM_023324	Mm.28957///Mm.28957///Mm.28957///Mm.28957
10374333	3.34206	Down	IKAROS family zinc finger 1	AK220235	Ikzf1	NM_001025597|NM_009578	Mm.103545///Mm.103545///Mm.103545///Mm.103545///Mm.103545///Mm.103545///Mm.103545///Mm.103545///Mm.103545///Mm.103545///Mm.103545///Mm.103545
10374236	2.70318	Down	uridine phosphorylase 1	D44464	Upp1	NM_009477	Mm.4610///Mm.4610///Mm.4610///Mm.4610
10373918	2.41264	Down	leukemia inhibitory factor	AF065917	Lif	NM_008501|NM_001039537	Mm.4964///Mm.4964///Mm.4964///Mm.4964///Mm.4964///Mm.4964///Mm.4964
10373912	7.76564	Down	oncostatin M	BC099866	Osm	NM_001013365	Mm.131422///Mm.131422///Mm.131422
10373542	2.00829	Down	diacylglycerol kinase, alpha	BC006713	Dgka	NM_016811	Mm.291235///Mm.291235///Mm.291235
10372988	2.73714	Down	solute carrier family 16 (monocarboxylic acid transporters), member 7	AF058054	Slc16a7	NM_011391	Mm.29161///Mm.29161///Mm.29161///Mm.29161
10372844	2.65353	Down	Ras association (RalGDS/AF-6) domain family member 3	BC011511	Rassf3	NM_138956	Mm.41265///Mm.41265///Mm.41265
10372652	3.80111	Down	lysozyme 1	BC061129	Lyz1	NM_013590	Mm.177539///Mm.177539///Mm.177539
10372648	11.1562	Down	lysozyme 2	BC002069	Lyz2	NM_017372	Mm.45436///Mm.45436///Mm.45436
10372028	3.15581	Down	plexin C1	AF190578	Plxnc1	NM_018797	Mm.256712///Mm.256712///Mm.256712
10371959	2.37398	Down	ELK3, member of ETS oncogene family	BC055735	Elk3	NM_013508	Mm.4454///Mm.4454///Mm.4454///Mm.4454
10371607	2.11753	Down	RIKEN cDNA 1200002N14 gene	BC021433	1200002N14Rik	NM_027878	Mm.35450///Mm.35450///Mm.35450
10370497	2.02265	Down	pyridoxal (pyridoxine, vitamin B6) kinase	BC027745	Pdxk	NM_172134	Mm.206159///Mm.206159///Mm.206159
10370339	2.59773	Down	transient receptor potential cation channel, subfamily M, member 2	AB166747	Trpm2	NM_138301	Mm.276762///Mm.276762///Mm.276762///Mm.276762///Mm.276762
10370259	2.06639	Down	collagen, type XVIII, alpha 1	BC064817	Col18a1	NM_009929|NM_001109991	Mm.4352///Mm.4352///Mm.4352///Mm.4352///Mm.4352///Mm.4352
10369379	2.46121	Down	solute carrier family 29 (nucleoside transporters), member 3	AF326986	Slc29a3	NM_023596	Mm.284462///Mm.284462///Mm.284462
10369102	2.47577	Down			ENSMUSG00000038594
10368720	2.346	Down	solute carrier family 16 (monocarboxylic acid transporters), member 10	BC052877	Slc16a10	NM_001114332|NM_028247	Mm.186778///Mm.186778///Mm.186778///Mm.186778///Mm.186778
10368644	2.09767	Down	RIKEN cDNA A630077B13 gene	BC095946	A630077B13Rik		Mm.34479///Mm.34479
10368616	2.57513	Down	zinc finger with UFM1-specific peptidase domain	BC089514	Zufsp	NM_028287	Mm.248081///Mm.248081///Mm.248081///Mm.248081///Mm.248081
10368343	2.76646	Down	arginase 1, liver	BC013341	Arg1	NM_007482	Mm.154144///Mm.154144///Mm.154144
10368175	4.48621	Down	phosphodiesterase 7B	AJ251859	Pde7b	NM_013875	Mm.425617///Mm.425617///Mm.425617
10368144	6.05989	Down	tumor necrosis factor, alpha-induced protein 3	BC050259	Tnfaip3	NM_009397	Mm.116683///Mm.116683///Mm.116683///Mm.116683
10367919	2.50282	Down	syntaxin 11	BC118516	Stx11		Mm.248648///Mm.248648
10367673	2.47678	Down	pleckstrin homology domain containing, family G (with RhoGef domain) member 1	BC117965	Plekhg1	NM_001033253	Mm.150831///Mm.150831///Mm.150831
10367591	4.22819	Down	myc target 1	AY090114	Myct1	NM_026793	Mm.338242///Mm.338242///Mm.338242
10367224	3.2856	Down	signal transducer and activator of transcription 2	AF206162	Stat2	NM_019963	Mm.293120///Mm.293120///Mm.293120///Mm.293120
10366886	3.03924	Down	Rho GTPase activating protein 9	BC027374	Arhgap9	NM_146011	Mm.227198///Mm.227198///Mm.227198///Mm.227198
10366476	3.93393	Down	protein tyrosine phosphatase, receptor type, B	AY077755	Ptprb	NM_029928	Mm.37213///Mm.37213///Mm.37213///Mm.37213
10366310	2.42249	Down	oxysterol binding protein-like 8		Osbpl8	NM_175489|NM_001003717	Mm.220204///Mm.220204///Mm.220204///Mm.220204///Mm.220204
10366052	2.90942	Down	kit ligand	U44725	Kitl	NM_013598	Mm.45124///Mm.45124///Mm.45124///Mm.45124///Mm.45124
10366043	4.64517	Down	dual specificity phosphatase 6	BC003869	Dusp6	NM_026268	Mm.1791///Mm.1791///Mm.1791
10365971	4.18761	Down	B-cell translocation gene 1, anti-proliferative	BC006834	Btg1	NM_007569	Mm.272183///Mm.272183///Mm.272183
10365769	3.46504	Down	histidine ammonia lyase	L07645	Hal	NM_010401	Mm.13000///Mm.13000///Mm.13000
10365290	2.01239	Down	carbohydrate sulfotransferase 11	AB030378	Chst11	NM_021439	Mm.360747///Mm.360747///Mm.360747
10365286	2.97398	Down	EP300 interacting inhibitor of differentiation 3	BC099545	Eid3	NM_025499	Mm.443284///Mm.443284
10364650	6.13323	Down	histocompatibility (minor) HA-1	BC053750	Hmha1	NM_027521	Mm.243954///Mm.243954///Mm.243954///Mm.243954///Mm.243954
10364262	9.06448	Down	integrin beta 2	M31039	Itgb2	NM_008404	Mm.1137///Mm.1137///Mm.1137
10364030	2.24527	Down	adenosine A2a receptor	BC110692	Adora2a	NM_009630	Mm.333734///Mm.333734///Mm.333734///Mm.333734
10363762	2.44178	Down	transmembrane protein 26	BC117502	Tmem26	NM_177794	Mm.72096///Mm.72096///Mm.72096
10363575	2.39544	Down	DNA replication helicase 2 homolog (yeast)	AK129051	Dna2	NM_177372	Mm.21492///Mm.21492///Mm.21492
10363445	4.5837	Down	RIKEN cDNA 4632428N05 gene	BC003967	4632428N05Rik	NM_028732	Mm.273584///Mm.273584///Mm.273584
10363346	4.70727	Down	ankyrin repeat domain 57		Ankrd57	NM_172939
10363231	7.62392	Down	sphingomyelin phosphodiesterase, acid-like 3A		Smpdl3a	NM_020561	Mm.2379///Mm.2379
10363161	4.11483	Down	RIKEN cDNA 6330442E10 gene		6330442E10Rik
10363082	16.0742	Down	leukocyte immunoglobulin-like receptor, subfamily B, member 4	BC006591	Lilrb4	NM_013532	Mm.34408///Mm.34408///Mm.34408///Mm.34408///Mm.34408///Mm.34408
10363070	19.1559	Down	glycoprotein 49 A | leukocyte immunoglobulin-like receptor, subfamily B, member 4	M65027	Gp49a|Lilrb4	NM_008147	Mm.439661///Mm.34408///Mm.439661///Mm.34408///Mm.439661///Mm.439661///Mm.34408
10362674	2.62831	Down	U3A small nuclear RNA		Rnu3a	NR_002842
10362596	2.23583	Down		M27266	Fyn	NM_001122893|NM_008054|NM_001122892	Mm.4848///Mm.4848///Mm.4848///Mm.4848///Mm.4848///Mm.4848
10362538	3.13306	Down	laminin, alpha 4	U59865	Lama4	NM_010681	Mm.258065///Mm.258065///Mm.258065
10362294	2.61664	Down	Rho GTPase activating protein 18	BC030858	Arhgap18	NM_176837	Mm.356496///Mm.356496///Mm.356496
10362171	2.03426	Down	syntaxin 7	AB019212	Stx7	NM_016797	Mm.248042///Mm.248042///Mm.248042
10361897	3.47695	Down	interferon gamma receptor 1	J05265	Ifngr1	NM_010511	Mm.549///Mm.549///Mm.549
10361790	2.09952	Down	fucosidase, alpha-L- 2, plasma	BC094449	Fuca2	NM_025799	Mm.26625///Mm.26625///Mm.26625
10361698	2.46076	Down	zinc finger CCCH type containing 12D	BC112398	Zc3h12d	NM_172785	Mm.140055///Mm.140055///Mm.140055
10361246	5.12561	Down	G0/G1 switch gene 2	BC117038	G0s2	NM_008059	Mm.439721///Mm.439721///Mm.439721
10361104	2.81794	Down	protein phosphatase 2, regulatory subunit B (B56), alpha isoform | similar to Protein phosphatase 2, regulatory subunit B (B56), alpha	BC059026	Ppp2r5a|LOC100046393	NM_144880	Mm.205569///Mm.205569///Mm.205569///Mm.205569
10360834	4.51691	Down	H2.0-like homeobox	BC064068	Hlx	NM_008250	Mm.1347///Mm.1347///Mm.1347
10360745	2.27379	Down	lamin B receptor	BC021516	Lbr	NM_133815	Mm.4538///Mm.4538///Mm.4538
10360506	2.57572	Down	thymoma viral proto-oncogene 3	BC066861	Akt3	NM_011785	Mm.235194///Mm.235194///Mm.235194///Mm.235194///Mm.235194
10360406	8.0136	Down	interferon activated gene 205	BC040425	Ifi205	NM_172648	Mm.425061///Mm.425061///Mm.425061
10360398	3.94191	Down	interferon activated gene 202B	M31418	Ifi202b	NM_008327|NM_011940	Mm.218770///Mm.218770///Mm.218770///Mm.218770
10360391	7.76952	Down	interferon activated gene 203	AF022371	Ifi203	NM_001045481|NM_008328	Mm.261270///Mm.472787///Mm.261270///Mm.472787///Mm.261270///Mm.472787///Mm.261270///Mm.472787///Mm.261270///Mm.472787
10360382	3.41878	Down	interferon activated gene 204 | myeloid cell nuclear differentiation antigen | interferon activated gene 205	M31419|BC132314	Ifi204|Mnda|Ifi205	NM_008329|NM_001033450	Mm.442561///Mm.457977///Mm.442561///Mm.425061///Mm.457977///Mm.442561///Mm.457977///Mm.442561
10360377	7.65047	Down			AI607873
10360173	2.68329	Down	SLAM family member 7	AF467910	Slamf7	NM_144539	Mm.164642///Mm.164642///Mm.164642
10360158	2.53052	Down	lymphocyte antigen 9	AF244131	Ly9	NM_008534	Mm.560///Mm.560///Mm.560///Mm.560///Mm.560
10360070	6.00361	Down	Fc receptor, IgE, high affinity I, gamma polypeptide	BC034163	Fcer1g	NM_010185	Mm.22673///Mm.22673///Mm.22673
10360040	3.22175	Down	Fc receptor, IgG, low affinity III	M14215	Fcgr3	NM_010188	Mm.22119///Mm.22119///Mm.22119
10360028	2.91885	Down	Fc receptor, IgG, low affinity IIb	M16367	Fcgr2b	NM_001077189|NM_010187	Mm.425062///Mm.425062///Mm.425062///Mm.425062///Mm.425062///Mm.425062
10359762	2.20555	Down	RCSD domain containing 1	BC025872	Rcsd1	NM_178593|NM_001038846	Mm.265552///Mm.265552///Mm.265552///Mm.265552///Mm.265552
10359181	2.65521	Down	torsin family 3, member A	BC071216	Tor3a	NM_023141	Mm.206737///Mm.206737///Mm.206737
10358978	3.21391	Down	immediate early response 5	BC051986	Ier5	NM_010500	Mm.12246///Mm.12246///Mm.12246
10358224	11.0307	Down	protein tyrosine phosphatase, receptor type, C	M92933	Ptprc	NM_001111316|NM_011210	Mm.391573///Mm.391573///Mm.391573///Mm.391573///Mm.391573///Mm.391573///Mm.391573///Mm.391573
10358038	2.24728	Down	arginyl aminopeptidase (aminopeptidase B)	BC019200	Rnpep	NM_145417	Mm.291048///Mm.291048///Mm.291048///Mm.291048
10357594	2.92268	Down	Ras association (RalGDS/AF-6) domain family member 5	BC089605	Rassf5	NM_018750	Mm.248291///Mm.248291///Mm.248291///Mm.248291
10357579	2.37179	Down	MAP kinase-activated protein kinase 2	BC063064	Mapkapk2	NM_008551	Mm.221235///Mm.221235///Mm.221235
10357472	9.81421	Down	chemokine (C-X-C motif) receptor 4	AB000803	Cxcr4	NM_009911	Mm.1401///Mm.1401///Mm.1401
10356932	3.105	Down	DNA segment, Chr 1, ERATO Doi 622, expressed	BC023951|BC019375	D1Ertd622e		Mm.12309///Mm.12309///Mm.12309///Mm.12309
10356880	2.54095	Down	ST8 alpha-N-acetyl-neuraminide alpha-2,8-sialyltransferase 4	BC060112	St8sia4	NM_009183	Mm.306228///Mm.306228///Mm.306228
10356475	2.91174	Down	ADP-ribosylation factor-like 4C	BC055769	Arl4c	NM_177305	Mm.27968///Mm.471624///Mm.27968///Mm.471624///Mm.27968///Mm.471624
10356293	2.70543	Down	RIKEN cDNA A630001G21 gene	BC052931	A630001G21Rik		Mm.116691///Mm.116691
10356278	6.10863	Down	Sp110 nuclear body protein | similar to Sp110 nuclear body protein	BC094500|BC099598	Sp110|MGC118608	NM_175397	Mm.335802///Mm.463040///Mm.335802///Mm.463040///Mm.335802///Mm.463040///Mm.335802///Mm.463040
10356274	3.87559	Down	component of Sp100-rs	BC071209	Csprs	NM_033616	Mm.362644///Mm.440912///Mm.441375///Mm.362644///Mm.440912///Mm.441375///Mm.362644///Mm.440912///Mm.441375
10356271	3.71471	Down			A530032D15Rik	NM_213615	Mm.386456///Mm.386456
10356269	5.15822	Down		BC094285	A530032D15Rik
10356267	2.22042	Down		BC094285	A530032D15Rik		Mm.386456///Mm.386456
10356262	8.45405	Down			EG665378	NM_001081746	Mm.449722///Mm.449722///Mm.449722
10356172	3.22048	Down	RIKEN cDNA 5033414K04 gene	BC080290	5033414K04Rik		Mm.187470///Mm.187470
10356020	5.21346	Down	dedicator of cytokinesis 10	AK122347	Dock10		Mm.133473///Mm.133473///Mm.133473///Mm.133473
10355162	2.61978	Down	pleckstrin homology domain containing, family M, member 3	BC063098	Plekhm3	NM_001039493	Mm.239534///Mm.239534///Mm.239534
10355141	2.05354	Down	Kruppel-like factor 7 (ubiquitous)	AF338369	Klf7	NM_033563	Mm.29466///Mm.29466///Mm.29466///Mm.29466///Mm.29466
10354677	2.97744	Down	ankyrin repeat domain 44		Ankrd44	NM_001081433	Mm.397910///Mm.397910
10354649	2.09542	Down	post-GPI attachment to proteins 1		Pgap1
10354598	3.18504	Down	HECT, C2 and WW domain containing E3 ubiquitin protein ligase 2	AB182244	Hecw2	NM_001001883|NM_172655	Mm.444911///Mm.444911///Mm.444911///Mm.444911///Mm.444911
10354588	3.45389	Down	serine/threonine kinase 17b (apoptosis-inducing)	AY092028	Stk17b	NM_133810	Mm.25559///Mm.25559///Mm.25559
10354506	3.12953	Down	RIKEN cDNA 2210010L05 gene	BC017534	2210010L05Rik	NM_133829|NM_178081	Mm.269793///Mm.269793///Mm.269793///Mm.269793///Mm.269793
10354418	3.28023	Down	oligonucleotide/oligosaccharide-binding fold containing 2A	AY880264	Obfc2a	NM_028696	Mm.196290///Mm.196290///Mm.196290
10354203	7.59988	Down
10354191	4.76007	Down	ring finger protein 149	BC115968	Rnf149	NM_001033135	Mm.28614///Mm.28614///Mm.28614
10354168	3.65739	Down	TBC1 domain family, member 8	BC065081	Tbc1d8	NM_018775	Mm.387293///Mm.387293///Mm.387293
10354003	2.41176	Down	mannoside acetylglucosaminyltransferase 4, isoenzyme A	AB053217	Mgat4a	NM_173870	Mm.25861///Mm.25861///Mm.25861
10353989	2.20697	Down		AK089564
10353844	5.94878	Down	lung-inducible neuralized-related C3HC4 RING domain protein	AF321278	Lincr	NM_153408	Mm.389110///Mm.389110///Mm.389110
10353438	2.16465	Down	translocating chain-associating membrane protein 2	BC018212	Tram2	NM_177409|NM_133252	Mm.185680///Mm.273241///Mm.185680///Mm.273241///Mm.185680///Mm.273241///Mm.185680///Mm.273241
10352936	2.50093	Down	SRY-box containing gene 17	D49473	Sox17	NM_011441	Mm.279103///Mm.279103///Mm.279103///Mm.279103
10352905	2.74421	Down	CD34 antigen	BC006607	Cd34	NM_001111059|NM_133654	Mm.29798///Mm.29798///Mm.29798///Mm.29798///Mm.29798
10352867	2.8211	Down	plexin A2	D86949	Plxna2	NM_008882	Mm.2251///Mm.2251///Mm.2251
10352234	2.01485	Down	inositol 1,4,5-trisphosphate 3-kinase B		Itpkb	NM_001081175	Mm.132535///Mm.132535
10351867	3.03557	Down	absent in melanoma 2	BC009664	Aim2	NM_001013779	Mm.131453///Mm.131453///Mm.131453
10351679	4.26249	Down	CD84 antigen	AF043445	Cd84	NM_013489	Mm.259115///Mm.259115///Mm.259115
10351658	5.31814	Down	CD48 antigen	BC060977	Cd48	NM_007649	Mm.1738///Mm.1738///Mm.1738///Mm.1738
10351644	4.75456	Down	CD244 natural killer cell receptor 2B4	L19057	Cd244	NM_018729	Mm.2299///Mm.2299///Mm.2299
10351623	2.43386	Down	F11 receptor	BC021876	F11r	NM_172647	Mm.294882///Mm.294882///Mm.294882
10351603	4.92168	Down	Rho GTPase activating protein 30	BC082573	Arhgap30	NM_001005508	Mm.251048///Mm.251048///Mm.251048///Mm.251048
10351509	10.2246	Down	Fc receptor, IgG, low affinity IV	AF499613	Fcgr4	NM_144559	Mm.251254///Mm.251254///Mm.251254
10351455	3.59517	Down	regulator of G-protein signaling 5	BC037683	Rgs5	NM_009063	Mm.20954///Mm.20954///Mm.20954
10351347	2.24895	Down	cellular repressor of E1A-stimulated genes 1 | pappalysin 2	BC027426	Creg1|Pappa2	NM_011804	Mm.294885///Mm.294885///Mm.458621///Mm.294885
10351197	17.2894	Down	selectin, lymphocyte	M25324	Sell	NM_011346	Mm.1461///Mm.1461///Mm.1461///Mm.1461
10350977	2.79121	Down	RIKEN cDNA 4930523C07 gene		4930523C07Rik
10350742	2.12151	Down	ribonuclease L (2', 5'-oligoisoadenylate synthetase-dependent)	AF281045	Rnasel	NM_011882	Mm.259254///Mm.259254///Mm.259254
10350689	2.19457	Down	neutrophil cytosolic factor 2	BC076609	Ncf2	NM_010877	Mm.270307///Mm.270307///Mm.270307
10350668	2.34022	Down	glycosyltransferase 25 domain containing 2	BC068118	Glt25d2	NM_177756	Mm.23782///Mm.23782///Mm.23782
10350630	4.62821	Down	niban protein	AB049355	Niban	NM_022018	Mm.458935///Mm.458935///Mm.458935///Mm.458935
10350594	2.522	Down	influenza virus NS1A binding protein	DQ914523	Ivns1abp	NM_054102|NM_001039512|NM_001039511	Mm.33764///Mm.33764///Mm.33764///Mm.33764///Mm.33764///Mm.33764///Mm.33764
10350516	4.38004	Down	prostaglandin-endoperoxide synthase 2	M88242	Ptgs2	NM_011198	Mm.292547///Mm.292547///Mm.292547
10350349	2.15091	Down	DENN/MADD domain containing 1B	BC042698	Dennd1b	NM_181347|NM_183217	Mm.337604///Mm.337604///Mm.337604///Mm.337604///Mm.337604
10350003	2.55512	Down	cytochrome b5 reductase 1	BC016266	Cyb5r1	NM_028057	Mm.280230///Mm.280230///Mm.280230///Mm.280230
10349968	13.4904	Down	chitinase 3-like 1	BC003780	Chi3l1	NM_007695	Mm.38274///Mm.38274///Mm.38274
10349834	2.06781	Down	phosphoinositide-3-kinase, class 2, beta polypeptide	BC132141	Pik3c2b		Mm.426771///Mm.426771///Mm.426771
10349782	2.23232	Down	NUAK family, SNF1-like kinase, 2	BC033302	Nuak2	NM_028778	Mm.100666///Mm.100666///Mm.100666///Mm.100666
10349648	6.15967	Down	cathepsin E	BC005432	Ctse	NM_007799	Mm.230249///Mm.230249///Mm.230249///Mm.230249
10348645	3.02608	Down	G protein-coupled receptor 35	AF200349	Gpr35	NM_022320|NM_001104529	Mm.152780///Mm.152780///Mm.152780///Mm.152780///Mm.152780
10348321	2.10278	Down	diacylglycerol kinase, delta	BC048957|AK172901	Dgkd		Mm.277217///Mm.277217///Mm.277217
10348244	6.25764	Down	inositol polyphosphate-5-phosphatase D	BC108328	Inpp5d	NM_010566|NM_001110192|NM_001110193	Mm.15105///Mm.15105///Mm.15105///Mm.15105///Mm.15105///Mm.15105
10347968	2.03767	Down
10347948	11.4205	Down		U83630	Sp100	NM_013673	Mm.290906///Mm.290906///Mm.290906///Mm.290906///Mm.290906///Mm.290906
10347933	6.50545	Down	Sp140 nuclear body protein | RIKEN cDNA A530032D15Rik gene	BC069971|BC094285	Sp140|A530032D15Rik	NM_001013817|NM_213615	Mm.445821///Mm.386456///Mm.445821///Mm.386456///Mm.445821///Mm.386456
10347925	5.44555	Down	predicted gene, EG665378 | component of Sp100-rs	BC071209	EG665378|Csprs	NM_001081746|NM_033616	Mm.449722///Mm.362644///Mm.440912///Mm.441375///Mm.449722///Mm.362644///Mm.440912///Mm.441375///Mm.362644///Mm.440912///Mm.441375///Mm.449722
10347915	5.55559	Down	component of Sp100-rs	BC071209	Csprs	NM_033616	Mm.362644///Mm.440912///Mm.441375///Mm.362644///Mm.440912///Mm.441375///Mm.362644///Mm.440912///Mm.441375
10347335	7.61672	Down	solute carrier family 11 (proton-coupled divalent metal ion transporters), member 1	L13732	Slc11a1	NM_013612	Mm.2913///Mm.2913///Mm.2913
10347291	19.4381	Down	interleukin 8 receptor, beta	BC051677	Il8rb	NM_009909	Mm.234466///Mm.234466///Mm.234466
10346564	2.04366	Down	caspase 8	BC006737	Casp8	NM_009812|NM_001080126	Mm.336851///Mm.336851///Mm.336851///Mm.336851
10346191	2.08558	Down	signal transducer and activator of transcription 1	BC004808	Stat1	NM_009283	Mm.277406///Mm.277406///Mm.277406
10346168	2.40934	Down	signal transducer and activator of transcription 4	U09351	Stat4	NM_011487	Mm.1550///Mm.1550///Mm.1550
10346164	3.63546	Down	serum deprivation response	BC027005	Sdpr	NM_138741	Mm.398690///Mm.398690///Mm.398690
10345824	3.58766	Down	interleukin 18 receptor accessory protein	AF077347	Il18rap	NM_010553	Mm.20466///Mm.20466///Mm.20466
10345715	2.0546	Down	mitogen-activated protein kinase kinase kinase kinase 4	AK129191	Map4k4	NM_008696	Mm.19073///Mm.19073///Mm.19073///Mm.19073
10345580	2.84887	Down	inositol polyphosphate-4-phosphatase, type I	AF317838	Inpp4a	NM_030266|NM_172971	Mm.425030///Mm.425030///Mm.425030///Mm.425030///Mm.425030///Mm.425030
10344837	3.50499	Down	DEP domain containing 2		Depdc2	NM_029525|NM_001033636	Mm.123247///Mm.123247///Mm.123247
10607877	4.78549	Up	phosphoribosyl pyrophosphate synthetase 2	BC024942	Prps2	NM_026662	Mm.272955///Mm.272955///Mm.272955
10607497	2.10804	Up	succinate-Coenzyme A ligase, GDP-forming, beta subunit	BC080781	Suclg2	NM_011507	Mm.371585///Mm.426727///Mm.371585///Mm.426727///Mm.371585///Mm.426727
10607143	5.57974	Up	calpain 6	BC052167	Capn6	NM_007603	Mm.30290///Mm.30290///Mm.30290
10607089	2.52675	Up	acyl-CoA synthetase long-chain family member 4	BC058663	Acsl4	NM_207625|NM_019477|NM_001033600	Mm.469988///Mm.469988///Mm.469988///Mm.469988///Mm.469988///Mm.469988///Mm.469988///Mm.469988
10606445	3.81223	Up	ribosomal protein S6 kinase polypeptide 6	BC054113	Rps6ka6	NM_025949	Mm.37617///Mm.37617///Mm.37617///Mm.37617///Mm.37617///Mm.37617///Mm.37617///Mm.37617
10606436	5.46107	Up	nucleosome binding protein 1	BC083087	Nsbp1	NM_016710	Mm.298443///Mm.298443///Mm.298443
10606369	2.9669	Up	integral membrane protein 2A	BC031420	Itm2a	NM_008409	Mm.193///Mm.193///Mm.193
10605811	2.33618	Up	RIKEN cDNA 2810002O09 gene	BC053442	2810002O09Rik	NM_175179	Mm.182867///Mm.182867///Mm.182867
10605766	2.37314	Up	melanoma antigen, family D, 1	BC016438	Maged1	NM_019791	Mm.27578///Mm.27578///Mm.27578
10605090	2.06237	Up	isocitrate dehydrogenase 3 (NAD+), gamma	BC085179	Idh3g	NM_008323	Mm.14825///Mm.14825///Mm.14825
10604405	2.40821	Up	apoptosis-inducing factor, mitochondrion-associated 1	DQ016499	Aifm1	NM_012019	Mm.240434///Mm.240434///Mm.240434///Mm.240434
10604175	2.05758	Up	RIKEN cDNA 6430550H21 gene	BC062956	6430550H21Rik		Mm.72979///Mm.72979///Mm.72979///Mm.72979
10603833	2.04894	Up	upregulated during skeletal muscle growth 5		Usmg5
10603764	6.72495	Up	Norrie disease homolog	BC090623	Ndph	NM_010883	Mm.5014///Mm.5014///Mm.5014
10603746	8.03289	Up	monoamine oxidase B	BC113788	Maob	NM_172778	Mm.473754///Mm.473754///Mm.473754
10603431	2.04996	Up	suppressor of variegation 3-9 homolog 1 (Drosophila)	AF019969	Suv39h1	NM_011514	Mm.9244///Mm.9244///Mm.9244///Mm.9244///Mm.9244///Mm.9244
10603099	5.09462	Up	c-fos induced growth factor	BC080770	Figf	NM_010216	Mm.297978///Mm.297978///Mm.297978
10603011	2.87948	Up	retinoblastoma binding protein 7	BC003785	Rbbp7	NM_009031	Mm.270186///Mm.270186///Mm.270186///Mm.270186///Mm.270186///Mm.270186
10602805	2.95793	Up	MAP7 domain containing 2		Mtap7d2	NM_001081124	Mm.160079///Mm.160079///Mm.160079///Mm.160079///Mm.160079///Mm.160079
10602164	2.88755	Up	retinoblastoma binding protein 7		Rbbp7
10601857	2.57591	Up	nerve growth factor receptor (TNFRSF16) associated protein 1	AF097440	Ngfrap1	NM_009750|NM_001110233|NM_001110234	Mm.90787///Mm.90787///Mm.90787///Mm.90787///Mm.90787///Mm.90787///Mm.90787
10601705	2.13447	Up	centromere protein I	BC030328	Cenpi	NM_145924	Mm.34903///Mm.34903///Mm.34903///Mm.34903
10601492	2.72482	Up	zinc finger protein 711		Zfp711	NM_177747	Mm.259846///Mm.259846///Mm.259846///Mm.259846
10601011	2.04139	Up	kinesin family member 4	BC050946	Kif4	NM_008446	Mm.383091///Mm.383091///Mm.383091
10600936	2.17293	Up	ephrin B1	BC021656	Efnb1	NM_010110	Mm.3374///Mm.3374///Mm.3374
10600901	2.68036	Up	androgen receptor	X59411	Ar	NM_013476	Mm.439657///Mm.439657///Mm.439657
10600857	2.04966	Up	hephaestin	AF082567	Heph	NM_010417|NM_181273	Mm.277092///Mm.277092///Mm.277092///Mm.277092///Mm.277092///Mm.277092
10600797	2.00005	Up	apolipoprotein O, pseudogene | apolipoprotein O	BC016557	Apoo-ps	NR_004438|NM_026673	Mm.379156///Mm.379156///Mm.379156///Mm.379156///Mm.379156///Mm.379156
10600485	2.1312	Up	dyskeratosis congenita 1, dyskerin homolog (human)	BC099966	Dkc1	NM_001030307	Mm.291062///Mm.291062///Mm.291062
10600210	4.95383	Up	solute carrier family 6 (neurotransmitter transporter, creatine), member 8	AF459435	Slc6a8	NM_133987	Mm.274553///Mm.274553///Mm.274553///Mm.274553///Mm.274553///Mm.274553
10600169	4.16291	Up	biglycan	L20276	Bgn	NM_007542	Mm.2608///Mm.2608///Mm.2608///Mm.2608
10599927	2.14621	Up	AF4/FMR2 family, member 2	AJ001549	Aff2	NM_008032	Mm.391269///Mm.466576///Mm.391269///Mm.466576///Mm.391269///Mm.466576
10599736	2.86278	Up	four and a half LIM domains 1	BC059009	Fhl1	NM_001077361|NM_001077362|NM_010211	Mm.3126///Mm.3126///Mm.3126///Mm.3126///Mm.3126///Mm.3126///Mm.3126///Mm.3126///Mm.3126///Mm.3126///Mm.3126///Mm.3126
10599200	2.49268	Up	progesterone receptor membrane component 1	BC006016	Pgrmc1	NM_016783	Mm.9052///Mm.9052///Mm.9052
10598976	2.77381	Up	tissue inhibitor of metalloproteinase 1	X04684	Timp1	NM_001044384|NM_011593	Mm.8245///Mm.8245///Mm.8245///Mm.8245///Mm.8245
10598848	2.12316	Up	PHD finger protein 16	BC065070	Phf16	NM_199317	Mm.281517///Mm.281517///Mm.281517///Mm.281517
10598075	2.06472	Up				NC_005089
10597883	2.0929	Up	transmembrane protein 16K	BC099688	Tmem16k	NM_133979	Mm.87676///Mm.87676///Mm.87676///Mm.87676
10597531	2.10695	Up	RNA binding motif, single stranded interacting protein	BC108402	Rbms3	NM_178660	Mm.326411///Mm.326411///Mm.326411///Mm.326411///Mm.326411///Mm.326411///Mm.326411///Mm.326411
10597477	2.12512	Up	glycerol-3-phosphate dehydrogenase 1-like	AK172886	Gpd1l	NM_175380	Mm.38198///Mm.38198///Mm.38198
10596680	2.00019	Up	sema domain, immunoglobulin domain (Ig), short basic domain, secreted, (semaphorin) 3B	BC090669	Sema3b	NM_001042779|NM_009153	Mm.4083///Mm.4083///Mm.4083///Mm.4083///Mm.4083///Mm.4083///Mm.4083///Mm.4083
10596403	2.04312	Up		AM748257	EG665033
10595981	2.29701	Up	muscle and microspikes RAS	AB004879	Mras	NM_008624	Mm.2045///Mm.2045///Mm.2045
10595979	2.79376	Up	muscle and microspikes RAS		Mras	NM_008624
10595657	3.21855	Up		AF529169	AF529169	NM_153509	Mm.458520///Mm.458520///Mm.458520///Mm.458520
10595480	6.27046	Up	malic enzyme 1, NADP(+)-dependent, cytosolic	J02652	Me1	NM_008615	Mm.148155///Mm.378128///Mm.148155///Mm.378128///Mm.148155///Mm.378128
10595324	2.54972	Up	5-hydroxytryptamine (serotonin) receptor 1B	BC119129	Htr1b	NM_010482	Mm.445308///Mm.445308///Mm.445308
10595205	2.35109	Up	RIKEN cDNA 2410127L17 gene	BC092281	2410127L17Rik	NM_026120	Mm.306602///Mm.306602///Mm.306602
10595109	2.34718	Up	leucine rich repeat containing 1	AK220166	Lrrc1	NM_172528	Mm.28534///Mm.28534///Mm.28534///Mm.28534///Mm.28534
10594835	2.10678	Up	glutamate receptor, ionotropic, N-methyl D-aspartate-like 1A	BC018502	Grinl1a	NM_178602	Mm.21094///Mm.21094///Mm.21094
10594758	2.43849	Up	glucosaminyl (N-acetyl) transferase 3, mucin type	EF202835	Gcnt3	NM_028087	Mm.195555///Mm.195555///Mm.195555
10594661	2.74255	Up	tropomyosin 1, alpha	M22479	Tpm1	NM_024427	Mm.121878///Mm.121878///Mm.121878///Mm.121878///Mm.121878///Mm.121878///Mm.121878///Mm.121878///Mm.121878///Mm.121878///Mm.121878///Mm.121878///Mm.121878///Mm.121878///Mm.121878///Mm.121878///Mm.121878///Mm.121878
10594426	2.99579	Up		BC027435	Zwilch	NM_026507	Mm.335237///Mm.335237///Mm.335237
10594418	3.38391	Up	MAD homolog 6 (Drosophila)	BC047280	Smad6	NM_008542	Mm.325757///Mm.325757///Mm.325757
10594199	2.09649	Up	thrombospondin, type I, domain containing 4		Thsd4	NM_001040426|NM_172444	Mm.28791///Mm.28791///Mm.28791///Mm.28791
10594110	4.22614	Up	neogenin	BC054540	Neo1	NM_008684|NM_001042752	Mm.42249///Mm.42249///Mm.42249///Mm.42249///Mm.42249///Mm.42249
10594044	4.3076	Up	immunoglobulin superfamily containing leucine-rich repeat	BC006602	Islr	NM_012043	Mm.440163///Mm.440163///Mm.440163
10593937	3.29801	Up	mannose phosphate isomerase	AF244360	Mpi	NM_025837	Mm.247218///Mm.247218///Mm.247218
10593591	2.00325	Up	acetyl-Coenzyme A acetyltransferase 1	BC024763	Acat1	NM_144784	Mm.293233///Mm.293233///Mm.293233
10593483	2.77248	Up	ferredoxin 1	L29123	Fdx1	NM_007996	Mm.1061///Mm.1061///Mm.1061///Mm.1061
10593367	2.45784	Up	dihydrolipoamide S-acetyltransferase (E2 component of pyruvate dehydrogenase complex)	BC031495	Dlat	NM_145614	Mm.285076///Mm.285076///Mm.285076
10593225	2.68673	Up	zinc finger and BTB domain containing 16	Z47205	Zbtb16	NM_001033324	Mm.457803///Mm.457803///Mm.457803
10592719	3.39057	Up	OAF homolog (Drosophila)	BC028824	Oaf	NM_178644	Mm.246479///Mm.246479///Mm.246479
10592251	3.86243	Up	Pbx/knotted 1 homeobox 2	BC050865	Pknox2	NM_001029838|NM_148950	Mm.260335///Mm.321278///Mm.260335///Mm.321278///Mm.260335///Mm.321278///Mm.260335///Mm.321278///Mm.260335///Mm.321278
10592201	2.53883	Up	checkpoint kinase 1 homolog (S. pombe)	BC100386	Chek1	NM_007691	Mm.16753///Mm.16753///Mm.16753
10591947	2.12199	Up	acyl-Coenzyme A dehydrogenase family, member 8	BC037644	Acad8	NM_025862	Mm.289244///Mm.289244///Mm.289244
10591781	3.24791	Up	anillin, actin binding protein (scraps homolog, Drosophila)	BC032164	Anln	NM_028390	Mm.282751///Mm.282751///Mm.282751
10591563	2.0903	Up	KN motif and ankyrin repeat domains 2	BC010245	Kank2	NM_145611	Mm.257371///Mm.257371///Mm.257371///Mm.257371
10590972	2.06007	Up	macrophage migration inhibitory factor | macrophage migration inhibitory factor-like | similar to macrophage migration inhibitory factor	BC024895	Mif|LOC100040259|LOC100044948	NM_010798|NM_001111330|XM_883948	Mm.2326///Mm.2326///Mm.2326///Mm.355004///Mm.355004///Mm.355004
10590860	2.3907	Up	RIKEN cDNA 9030420J04 gene		9030420J04Rik
10590844	3.33016	Up	RIKEN cDNA 9030420J04 gene	AK082857	9030420J04Rik	XM_146632|XM_984736	Mm.334955///Mm.334955///Mm.334955///Mm.334955
10590494	2.18699	Up	kinesin family member 15	BC060710	Kif15	NM_010620	Mm.278920///Mm.278920///Mm.278920
10590073	3.43829	Up	villin-like	AJ344341	Vill	NM_011700	Mm.83817///Mm.83817///Mm.83817///Mm.83817
10590060	2.4189	Up	CTD (carboxy-terminal domain, RNA polymerase II, polypeptide A) small phosphatase-like	BC094289	Ctdspl	NM_133710	Mm.439928///Mm.439928///Mm.439928
10589407	3.2351	Up	serine peptidase inhibitor, Kazal type 8	DQ437329	Spink8	NM_183136	Mm.99613///Mm.99613///Mm.99613
10588942	3.52724	Up	laminin, beta 2	BC026051	Lamb2	NM_008483	Mm.425599///Mm.425599///Mm.425599
10588707	2.25612	Up	interferon-related developmental regulator 2	BC037434	Ifrd2	NM_025903	Mm.215335///Mm.215335///Mm.215335
10588243	2.12012	Up	receptor-like tyrosine kinase	L02210	Ryk	NM_013649|NM_001042607	Mm.335391///Mm.335391///Mm.335391///Mm.335391
10587829	5.58833	Up	procollagen lysine, 2-oxoglutarate 5-dioxygenase 2	AF080572	Plod2	NM_011961	Mm.79983///Mm.79983///Mm.79983
10587554	2.33381	Up	trophoblast glycoprotein	BC058198	Tpbg	NM_011627	Mm.432513///Mm.432513///Mm.432513///Mm.432513
10587315	4.03027	Up	glutathione S-transferase, alpha 4	BC012639	Gsta4	NM_010357	Mm.2662///Mm.2662///Mm.2662
10586865	4.18003	Up	aldehyde dehydrogenase family 1, subfamily A2	BC075704	Aldh1a2	NM_009022	Mm.42016///Mm.42016///Mm.42016
10586448	2.46405	Up	RIKEN cDNA 2810417H13 gene	BC096393	2810417H13Rik	NM_026515	Mm.351273///Mm.351273///Mm.351273
10586331	2.0415	Up	putative neuronal cell adhesion molecule	BC053057	Punc	NM_008988	Mm.41529///Mm.453118///Mm.41529///Mm.453118///Mm.41529///Mm.453118
10586184	2.12048	Up	timeless interacting protein	BC016211	Tipin	NM_025372	Mm.196219///Mm.196219///Mm.196219
10586110	2.41892	Up	ceroid-lipofuscinosis, neuronal 6		Cln6	NM_001033175	Mm.283636///Mm.283636
10585851	3.62383	Up	hyperpolarization-activated, cyclic nucleotide-gated K+ 4		Hcn4	NM_001081192	Mm.151967///Mm.151967
10585803	3.49165	Up	stimulated by retinoic acid gene 6	AF062476	Stra6	NM_009291	Mm.10801///Mm.10801///Mm.10801///Mm.10801
10585794	7.66163	Up	cytochrome P450, family 11, subfamily a, polypeptide 1	AF195119	Cyp11a1	NM_019779	Mm.302865///Mm.302865///Mm.302865
10585586	2.03221	Up	ubiquitin-conjugating enzyme E2S | similar to Ubiquitin-conjugating enzyme E2S	BC083323	Ube2s|LOC100048381	NM_133777	Mm.389787///Mm.389787///Mm.389787
10585438	3.18657	Up	cellular retinoic acid binding protein I	X15789	Crabp1	NM_013496	Mm.34797///Mm.34797///Mm.34797
10585417	3.30668	Up	isocitrate dehydrogenase 3 (NAD+) alpha	BC034273	Idh3a	NM_029573	Mm.279195///Mm.279195///Mm.279195
10585381	3.72502	Up	solute carrier family 35, member F2	BC055843	Slc35f2	NM_028060	Mm.26159///Mm.26159///Mm.26159
10585286	2.05451	Up	Rho GTPase activating protein 20		Arhgap20	NM_175535	Mm.443529///Mm.443529
10584741	2.02612	Up	solute carrier family 37 (glucose-6-phosphate transporter), member 4	BC075655	Slc37a4	NM_008063	Mm.30087///Mm.30087///Mm.30087
10584710	2.77727	Up	H2A histone family, member X	BC010336	H2afx	NM_010436	Mm.245931///Mm.245931///Mm.245931
10584628	2.12362	Up	thymus cell antigen 1, theta	BC054436	Thy1	NM_009382	Mm.3951///Mm.3951///Mm.3951///Mm.3951
10584561	3.86169	Up	RIKEN cDNA 9030425E11 gene	AB040490	9030425E11Rik	NM_133733	Mm.280560///Mm.280560///Mm.280560///Mm.280560
10584208	2.83171	Up	cell adhesion molecule-related/down-regulated by oncogenes	BC109176	Cdon	NM_021339	Mm.80509///Mm.80509///Mm.80509
10583732	2.18683	Up	low density lipoprotein receptor	BC053041	Ldlr	NM_010700	Mm.3213///Mm.3213///Mm.3213///Mm.3213
10583496	2.01158	Up	peter pan homolog (Drosophila)	BC014688	Ppan	NM_145610	Mm.2930///Mm.2930///Mm.2930
10583195	5.00593	Up			ENSMUSG00000022845
10583179	4.6564	Up	progesterone receptor	BC145807	Pgr	NM_008829	Mm.12798///Mm.12798///Mm.12798///Mm.12798///Mm.12798
10583008	2.96328	Up	caspase 12 | hypothetical protein LOC100044205	BC028979	Casp12|LOC100044205	NM_009808	Mm.42163///Mm.42163///Mm.42163
10582809	2.03985	Up	thymidine kinase 1	M11945	Tk1	NM_009387	Mm.2661///Mm.2661///Mm.2661
10581940	2.04567	Up	lysyl-tRNA synthetase	BC027356	Kars	NM_053092	Mm.196544///Mm.196544///Mm.196544///Mm.196544
10581865	2.58764	Up	lactate dehydrogenase D	AY092768	Ldhd	NM_027570	Mm.27589///Mm.27589///Mm.27589///Mm.27589
10581013	3.72497	Up	cadherin 11	BC046314	Cdh11	NM_009866	Mm.1571///Mm.1571///Mm.1571
10580733	2.38911	Up	Bardet-Biedl syndrome 2 homolog (human)	AF342737	Bbs2	NM_026116	Mm.292107///Mm.292107///Mm.292107
10580510	2.25621	Up	sal-like 1 (Drosophila)	BC062937	Sall1	NM_021390	Mm.214361///Mm.214361///Mm.214361
10580274	3.60428	Up	ribonuclease H2, large subunit	BC029252	Rnaseh2a	NM_027187	Mm.182470///Mm.182470///Mm.182470///Mm.182470///Mm.182470
10580233	2.01713	Up	glutaryl-Coenzyme A dehydrogenase	BC061158	Gcdh	NM_008097|NM_001044744	Mm.2475///Mm.2475///Mm.2475///Mm.2475///Mm.2475
10578989	3.30654	Up	pleckstrin and Sec7 domain containing 3	AB220685	Psd3	NM_177698|NM_030263|NM_027626	Mm.32525///Mm.32525///Mm.32525///Mm.32525///Mm.32525///Mm.32525///Mm.32525
10578984	2.24902	Up	Tu translation elongation factor, mitochondrial | similar to Tu translation elongation factor, mitochondrial	BC100596	Tufm|LOC100046745	NM_172745	Mm.197829///Mm.197829///Mm.197829///Mm.197829
10578829	2.82311	Up	palladin, cytoskeletal associated protein	AK173081	Palld	NM_001081390	Mm.29933///Mm.29933///Mm.29933///Mm.29933///Mm.29933
10578649	2.49275	Up	odd Oz/ten-m homolog 3 (Drosophila)	AB025412	Odz3	NM_011857	Mm.42191///Mm.42191///Mm.42191
10578539	2.63603	Up	solute carrier family 25 (mitochondrial carrier, adenine nucleotide translocator), member 4	U27315	Slc25a4	NM_007450	Mm.16228///Mm.16228///Mm.16228
10578493	2.50833	Up	toll-like receptor 3	BC099937	Tlr3	NM_126166	Mm.33874///Mm.33874///Mm.33874
10578477	3.00095	Up		AK220518	BC035537	NM_153535	Mm.51259///Mm.51259///Mm.51259///Mm.51259
10577808	2.45175	Up	transforming, acidic coiled-coil containing protein 1	AY177413	Tacc1	NM_177089|NM_199323	Mm.308452///Mm.308452///Mm.308452///Mm.308452///Mm.308452
10577315	3.20742	Up	angiopoietin 2	BC027216	Angpt2	NM_007426	Mm.439874///Mm.439874///Mm.439874
10576883	2.85354	Up	Shc SH2-domain binding protein 1	AF017152	Shcbp1	NM_011369	Mm.37801///Mm.37801///Mm.37801
10576610	3.17837	Up	par-3 (partitioning defective 3) homolog (C. elegans)	BC090616	Pard3	NM_033620|NM_001013581|NM_001122850|NM_001013580	Mm.299254///Mm.299254///Mm.299254///Mm.299254///Mm.299254///Mm.299254///Mm.299254///Mm.299254
10576386	2.45911	Up	ras homolog gene family, member U	AB051827	Rhou	NM_133955	Mm.168257///Mm.168257///Mm.168257
10576235	4.0933	Up	dipeptidase 1 (renal)	BC003492	Dpep1	NM_007876	Mm.20388///Mm.20388///Mm.20388
10575976	2.53187	Up	cysteine-rich secretory protein LCCL domain containing 2	BC090642	Crispld2	NM_030209	Mm.264680///Mm.264680///Mm.264680///Mm.264680///Mm.264680
10575733	2.37604	Up	centromere protein N	BC027119	Cenpn	NM_028131	Mm.23185///Mm.23185///Mm.23185
10575034	2.69878	Up	cadherin 3	BC098459	Cdh3	NM_001037809|NM_007665	Mm.4658///Mm.4658///Mm.4658///Mm.4658
10574033	2.10505	Up	nucleoporin 93	AK129055	Nup93	NM_172410	Mm.458170///Mm.458170///Mm.458170///Mm.458170
10574027	2.23147	Up	metallothionein 1	BC027262	Mt1	NM_013602	Mm.192991///Mm.192991///Mm.192991///Mm.192991
10574023	3.28077	Up	metallothionein 2	BC031758	Mt2	NM_008630	Mm.147226///Mm.147226///Mm.147226
10574013	2.67493	Up	metallothionein 4	BC141870	Mt4	NM_008631	Mm.1536///Mm.1536///Mm.1536
10573979	2.15367	Up	guanine nucleotide binding protein, alpha O	BC051989	Gnao1	NM_010308|NM_001113384	Mm.251445///Mm.251445///Mm.251445///Mm.251445///Mm.251445
10573956	2.64237	Up	solute carrier family 6 (neurotransmitter transporter, noradrenalin), member 2	BC066216	Slc6a2	NM_009209	Mm.57040///Mm.57040///Mm.57040
10573924	3.13834	Up	matrix metallopeptidase 2	BC070430	Mmp2	NM_008610	Mm.29564///Mm.29564///Mm.29564
10573713	2.09032	Up	HEAT repeat containing 3	BC065060	Heatr3	NM_172757	Mm.36291///Mm.36291///Mm.36291
10573626	2.13282	Up	glutamic pyruvate transaminase (alanine aminotransferase) 2	BC034219	Gpt2	NM_173866	Mm.200423///Mm.200423///Mm.200423
10573483	2.41982	Up	peroxiredoxin 2	BC086783	Prdx2	NM_011563	Mm.347009///Mm.347009///Mm.347009///Mm.347009///Mm.347009
10573261	2.47028	Up	ASF1 anti-silencing function 1 homolog B (S. cerevisiae)	BC003428	Asf1b	NM_024184	Mm.29680///Mm.29680///Mm.29680
10573234	2.22885	Up	latrophilin 1	BC085138	Lphn1	NM_181039	Mm.260733///Mm.260733///Mm.260733///Mm.260733///Mm.260733
10572906	2.14888	Up	minichromosome maintenance deficient 5, cell division cycle 46 (S. cerevisiae)	D26090	Mcm5	NM_008566	Mm.5048///Mm.5048///Mm.5048
10572432	4.36879	Up	myo-inositol 1-phosphate synthase A1	AF288525	Isyna1	NM_023627	Mm.29357///Mm.29357///Mm.29357
10571860	4.04969	Up	heart and neural crest derivatives expressed transcript 2		Hand2	NM_010402	Mm.471603///Mm.471603
10571752	2.89536	Up	dCMP deaminase	BC031719	Dctd	NM_178788	Mm.121549///Mm.121549///Mm.121549///Mm.121549
10571601	6.40564	Up	PDZ and LIM domain 3	BC070418	Pdlim3	NM_016798	Mm.282900///Mm.282900///Mm.282900
10571567	2.40177	Up	sorbin and SH3 domain containing 2	BC039163	Sorbs2	NM_172752	Mm.211096///Mm.211096///Mm.211096///Mm.211096///Mm.211096///Mm.211096
10571530	2.35322	Up	FAT tumor suppressor homolog 1 (Drosophila)		Fat1	NM_001081286	Mm.27365///Mm.27365///Mm.27365///Mm.27365
10571467	3.65219	Up	platelet-derived growth factor receptor-like	BC058275	Pdgfrl	NM_026840	Mm.284246///Mm.284246///Mm.284246
10571142	2.98116	Up	G protein-coupled receptor 124	AF378759	Gpr124	NM_054044	Mm.87046///Mm.87046///Mm.87046
10570982	2.573	Up	fibroblast growth factor receptor 1	BC010200	Fgfr1	NM_010206|NM_001079908|NM_001079909	Mm.265716///Mm.265716///Mm.265716///Mm.265716///Mm.265716///Mm.265716
10569618	4.44207	Up	transmembrane protein 16A	BC062959	Tmem16a	NM_178642	Mm.26700///Mm.26700///Mm.26700
10569569	2.59894	Up	cortactin	U03184	Cttn	NM_007803	Mm.205601///Mm.205601///Mm.205601///Mm.205601
10569429	3.20432	Up	cyclin-dependent kinase inhibitor 1C (P57)	U20553	Cdkn1c	NM_009876	Mm.168789///Mm.168789///Mm.168789
10569200	2.1847	Up	polymerase (RNA) II (DNA directed) polypeptide L		Polr2l
10569113	3.06745	Up	mucin-like protocadherin	BC043336	Mupcdh	NM_001114322|NM_028069	Mm.29080///Mm.29080///Mm.29080///Mm.29080///Mm.29080
10568668	3.36655	Up	a disintegrin and metallopeptidase domain 12 (meltrin alpha)	D50411	Adam12	NM_007400	Mm.439714///Mm.439714///Mm.439714
10568436	4.32194	Up	fibroblast growth factor receptor 2	M86441	Fgfr2	NM_010207|NM_201601	Mm.16340///Mm.16340///Mm.16340///Mm.16340///Mm.16340///Mm.16340///Mm.16340
10568150	2.05124	Up	kinesin family member 22	BC003427	Kif22	NM_145588	Mm.458209///Mm.458209///Mm.458209///Mm.458209
10567657	2.05886	Up	NADH dehydrogenase (ubiquinone) 1, alpha/beta subcomplex, 1	BC092379	Ndufab1	NM_028177	Mm.3014///Mm.347976///Mm.3014///Mm.347976///Mm.3014///Mm.347976///Mm.3014///Mm.347976
10567412	2.05224	Up	exonuclease domain containing 1	BC052150	Exod1	NM_027698	Mm.274160///Mm.274160///Mm.274160///Mm.274160
10567303	2.1769	Up	demethyl-Q 7	AF098949	Coq7	NM_009940	Mm.20634///Mm.20634///Mm.20634///Mm.20634
10567134	2.45132	Up	pleckstrin homology domain containing, family A member 7	BC060678	Plekha7	NM_172743	Mm.3741///Mm.3741///Mm.3741///Mm.3741
10567043	3.88464	Up	related RAS viral (r-ras) oncogene homolog 2	BC003871	Rras2	NM_025846	Mm.276572///Mm.276572///Mm.276572
10567010	3.70421	Up	dickkopf homolog 3 (Xenopus laevis)	AF177400	Dkk3	NM_015814	Mm.55143///Mm.55143///Mm.55143
10566934	3.38858	Up	lymphatic vessel endothelial hyaluronan receptor 1	BC038653	Lyve1	NM_053247	Mm.396078///Mm.396078///Mm.396078
10565775	2.00396	Up	diacylglycerol O-acyltransferase 2	BC043447	Dgat2	NM_026384	Mm.180189///Mm.180189///Mm.180189
10565570	2.3698	Up	RIKEN cDNA 4632434I11 gene	DQ400346	4632434I11Rik	NM_001080995	Mm.26468///Mm.26468///Mm.26468
10564978	2.22802	Up	Bloom syndrome homolog (human)	AB008674	Blm	NM_007550|NM_001042527	Mm.12932///Mm.12932///Mm.12932///Mm.12932
10564857	2.43909	Up	isocitrate dehydrogenase 2 (NADP+), mitochondrial	AF212319	Idh2	NM_173011	Mm.246432///Mm.246432///Mm.246432
10564849	2.2065	Up	RIKEN cDNA 2610034B18 gene	BC031379	2610034B18Rik	NM_027420	Mm.34266///Mm.34266///Mm.34266
10564818	2.81897	Up	alanyl (membrane) aminopeptidase	U77083	Anpep	NM_008486	Mm.4487///Mm.4487///Mm.4487///Mm.4487
10564805	2.9164	Up	peroxisomal biogenesis factor 11a	AF093669	Pex11a	NM_011068	Mm.20615///Mm.20615///Mm.20615///Mm.20615
10564527	2.63095	Up	nuclear receptor subfamily 2, group F, member 2	BC042484	Nr2f2	NM_009697|NM_183261	Mm.158143///Mm.158143///Mm.158143///Mm.158143///Mm.158143
10564507	2.18631	Up	arrestin domain containing 4	BC017528	Arrdc4	NM_001042592|NM_025549	Mm.251199///Mm.251199///Mm.251199///Mm.251199
10564467	2.43429	Up	leucine rich repeat containing 28	BC086694	Lrrc28	NM_175124	Mm.31247///Mm.31247///Mm.31247///Mm.31247///Mm.31247
10564417	2.53241	Up	aldehyde dehydrogenase family 1, subfamily A3	BC058277	Aldh1a3	NM_053080	Mm.140988///Mm.140988///Mm.140988
10563883	2.04804	Up	DEP domain containing 1a	BC023934	Depdc1a	NM_029523	Mm.371655///Mm.371655///Mm.371655///Mm.371655
10563780	4.51929	Up	E2F transcription factor 8	AY957576	E2f8	NM_001013368	Mm.240566///Mm.240566///Mm.240566///Mm.240566
10563411	2.00604	Up	glutamate-rich WD repeat containing 1	AB001539	Grwd1	NM_153419	Mm.274847///Mm.274847///Mm.274847///Mm.274847///Mm.274847///Mm.274847
10563275	2.12598	Up	RuvB-like protein 2	AB013912	Ruvbl2	NM_011304	Mm.34410///Mm.34410///Mm.34410///Mm.34410
10563077	3.33876	Up	reticulocalbin 3, EF-hand calcium binding domain	BC025602	Rcn3	NM_026555	Mm.29997///Mm.29997///Mm.29997
10563014	2.46707	Up	protein arginine N-methyltransferase 1	BC051953	Prmt1	NM_019830	Mm.27545///Mm.27545///Mm.27545///Mm.27545///Mm.27545///Mm.27545
10562637	4.29097	Up	cyclin B1	BC085238	Ccnb1		Mm.260114///Mm.380027///Mm.260114///Mm.380027
10562576	2.99036	Up	pleckstrin homology domain containing, family F (with FYVE domain) member 1	BC002120	Plekhf1	NM_024413	Mm.333798///Mm.333798///Mm.333798
10562563	3.16207	Up	cyclin E1	BC106191	Ccne1	NM_007633	Mm.16110///Mm.16110///Mm.16110
10562096	2.09918	Up	transmembrane protein 147	BC035323	Tmem147	NM_027215	Mm.27499///Mm.27499///Mm.27499
10561806	2.06379	Up	macrophage migration inhibitory factor | macrophage migration inhibitory factor-like | similar to macrophage migration inhibitory factor	BC086928	Mif|LOC100040259|LOC100044948	NM_010798|NM_001111330|XM_883948	Mm.2326///Mm.2326///Mm.2326///Mm.355004///Mm.355004///Mm.355004
10561478	2.36234	Up	RIKEN cDNA 1190020J12 gene		1190020J12Rik	NM_001081115	Mm.224815///Mm.224815
10561128	2.27577	Up	cytochrome P450, family 2, subfamily s, polypeptide 1	BC064733	Cyp2s1	NM_028775	Mm.275188///Mm.275188///Mm.275188
10560630	2.03903	Up	translocase of outer mitochondrial membrane 40 homolog (yeast)	BC100452	Tomm40	NM_001109748|NM_016871	Mm.440173///Mm.440173///Mm.440173///Mm.440173
10559676	2.01545	Up	ubiquitin-conjugating enzyme E2S | similar to Ubiquitin-conjugating enzyme E2S	BC083323	Ube2s|LOC100048381	NM_133777	Mm.389787///Mm.389787///Mm.389787
10559516	2.65398	Up	retinol dehydrogenase 13 (all-trans and 9-cis)	BC082583	Rdh13	NM_175372	Mm.466740///Mm.466740///Mm.466740
10559385	2.4034	Up	MAS-related GPR, member F	BC019711	Mrgprf	NM_145379	Mm.215151///Mm.215151///Mm.215151
10559312	2.14743	Up	7-dehydrocholesterol reductase	AF057368	Dhcr7	NM_007856	Mm.249342///Mm.249342///Mm.249342///Mm.249342///Mm.249342///Mm.249342
10558961	3.26459	Up	tetraspanin 4	BC083070	Tspan4	NM_053082	Mm.259477///Mm.259477///Mm.259477
10558948	2.06623	Up	CD151 antigen	U89772	Cd151	NM_009842|NM_001111050|NM_001111049	Mm.30246///Mm.30246///Mm.30246///Mm.30246///Mm.30246///Mm.30246
10558866	2.57646	Up	dopamine receptor 4	BC051421	Drd4	NM_007878	Mm.41075///Mm.41075///Mm.41075
10558439	2.03126	Up	3-phosphoglycerate dehydrogenase	BC086668	Phgdh	NM_016966	Mm.16898///Mm.371997///Mm.16898///Mm.371997///Mm.16898///Mm.371997///Mm.16898///Mm.371997
10558227	2.30281	Up	acyl-Coenzyme A dehydrogenase, short/branched chain	BC054428	Acadsb	NM_025826	Mm.334274///Mm.334274///Mm.334274
10557420	2.22466	Up	Tu translation elongation factor, mitochondrial | similar to Tu translation elongation factor, mitochondrial	BC060959	Tufm|LOC100046745	NM_172745	Mm.197829///Mm.197829///Mm.197829///Mm.197829
10557156	2.73201	Up	polo-like kinase 1 (Drosophila)	L19558	Plk1	NM_011121	Mm.16525///Mm.16525///Mm.16525
10557009	2.0088	Up	eukaryotic elongation factor-2 kinase	BC003433	Eef2k	NM_007908	Mm.25997///Mm.25997///Mm.25997///Mm.25997///Mm.25997///Mm.25997///Mm.25997
10556509	3.13333	Up	spondin 1, (f-spondin) extracellular matrix protein	BC020531	Spon1	NM_145584	Mm.334160///Mm.334160///Mm.334160///Mm.334160
10556456	3.15442	Up	RIKEN cDNA 2610024B07 gene	BC049153	2610024B07Rik		Mm.24685///Mm.24685
10556442	2.42813	Up	TEA domain family member 1	L13853	Tead1	NM_009346	Mm.28081///Mm.28081///Mm.28081///Mm.28081///Mm.28081
10556426	2.36366	Up	parvin, alpha	BC059236	Parva	NM_020606	Mm.143763///Mm.143763///Mm.143763///Mm.143763///Mm.143763
10556266	3.20798	Up	wee 1 homolog (S. pombe)	BC006852	Wee1	NM_009516	Mm.287173///Mm.287173///Mm.287173
10555695	3.81268	Up	ribonucleotide reductase M1	K02927	Rrm1	NM_009103	Mm.197486///Mm.197486///Mm.197486
10555460	3.65678	Up	START domain containing 10	AB031550	Stard10	NM_019990	Mm.28896///Mm.28896///Mm.28896
10554752	3.07927	Up	NADPH oxidase 4	AB042745	Nox4	NM_015760	Mm.31748///Mm.31748///Mm.31748///Mm.31748///Mm.31748
10554445	3.58274	Up	protein regulator of cytokinesis 1	BC059808	Prc1	NM_145150	Mm.227274///Mm.227274///Mm.227274///Mm.227274
10553833	2.67886	Up	necdin	M80840	Ndn	NM_010882	Mm.400253///Mm.400253///Mm.400253
10553788	2.64102	Up	ATPase, class V, type 10A	AF156549	Atp10a	NM_009728	Mm.135129///Mm.135129///Mm.135129
10553336	2.30565	Up	zinc finger, DHHC domain containing 13	BC046599	Zdhhc13	NM_028031	Mm.279116///Mm.279116///Mm.279116
10553163	2.17895	Up	nodal modulator 1	BC072630	Nomo1	NM_153057	Mm.274811///Mm.274811///Mm.274811
10552945	2.34789	Up	glycogen synthase 1, muscle	BC131687	Gys1	NM_030678	Mm.275654///Mm.275654///Mm.275654
10552418	2.13308	Up	electron transferring flavoprotein, beta polypeptide	BC049237	Etfb	NM_026695	Mm.30200///Mm.30200///Mm.30200
10552037	2.93815	Up	suprabasin	AY115494	Sbsn	NM_172205|NM_001083903	Mm.250717///Mm.250717///Mm.250717///Mm.250717
10551197	3.69857	Up	cytochrome P450, family 2, subfamily b, polypeptide 10	BC060973	Cyp2b10	NM_009999	Mm.218749///Mm.218749///Mm.218749///Mm.218749
10550102	2.11579	Up	ligase I, DNA, ATP-dependent	U19604	Lig1	NM_001083188|NM_010715	Mm.288179///Mm.288179///Mm.288179///Mm.288179
10549733	2.17603	Up	RIKEN cDNA A430110N23 gene		A430110N23Rik	NM_173008	Mm.44190///Mm.44190
10549473	2.52535	Up	caprin family member 2	BC025636	Caprin2	NM_181541	Mm.150568///Mm.150568///Mm.150568///Mm.150568
10549420	4.95967	Up	transmembrane and tetratricopeptide repeat containing 1		Tmtc1	NM_198967	Mm.137858///Mm.137858///Mm.137858
10548879	3.7443	Up	matrix Gla protein	BC036991	Mgp	NM_008597	Mm.243085///Mm.243085///Mm.243085
10548194	3.00473	Up	FK506 binding protein 4	BC003447	Fkbp4	NM_010219	Mm.12758///Mm.12758///Mm.12758
10548146	2.1238	Up	TEA domain family member 4	D87966	Tead4	NM_011567|NM_001080979	Mm.14774///Mm.14774///Mm.14774///Mm.14774///Mm.14774
10547943	2.76029	Up	non-SMC condensin I complex, subunit D2	BC026982	Ncapd2	NM_146171	Mm.257590///Mm.257590///Mm.257590///Mm.257590
10547740	2.6037	Up	complement component 1, s subcomponent	BC018319	C1s	NM_144938|NM_001097617	Mm.219527///Mm.219527///Mm.219527///Mm.219527
10546725	5.25013	Up	PDZ domain containing RING finger 3	AF127084	Pdzrn3	NM_018884	Mm.321654///Mm.321654///Mm.321654///Mm.321654
10546538	2.03888	Up	succinate-Coenzyme A ligase, GDP-forming, beta subunit	BC080781	Suclg2	NM_011507	Mm.371585///Mm.426727///Mm.371585///Mm.426727///Mm.371585///Mm.426727
10546476	2.41217	Up	membrane associated guanylate kinase, WW and PDZ domain containing 1	AF027503	Magi1	NM_001029850|NM_010367|NM_001083320|NM_001083321	Mm.217216///Mm.217216///Mm.217216///Mm.217216///Mm.217216///Mm.217216///Mm.217216///Mm.217216
10546163	2.25924	Up	minichromosome maintenance deficient 2 mitotin (S. cerevisiae)	BC055318	Mcm2	NM_008564	Mm.16711///Mm.16711///Mm.16711
10545974	3.66167	Up	anthrax toxin receptor 1	BC094544	Antxr1	NM_054041	Mm.232525///Mm.232525///Mm.232525///Mm.232525
10545588	4.39125	Up	hexokinase 2	BC054472	Hk2	NM_013820	Mm.255848///Mm.255848///Mm.255848
10545534	2.08036	Up	ring finger protein 26	BC063251	Rnf26	NM_153762	Mm.472711///Mm.472711///Mm.472711///Mm.472711
10545394	2.7622	Up	ring finger protein 181	BC005559	Rnf181	NM_025607	Mm.333157///Mm.333157///Mm.333157///Mm.333157
10545372	3.55136	Up	atonal homolog 8 (Drosophila)	AB046527	Atoh8	NM_153778	Mm.87449///Mm.87449///Mm.87449
10545045	2.27544	Up	RIKEN cDNA D430015B01 gene	BC080861	D430015B01Rik	NM_153574	Mm.28813///Mm.28813///Mm.28813
10544885	2.85849	Up	FK506 binding protein 14	BC034313	Fkbp14	NM_153573	Mm.274693///Mm.274693///Mm.274693///Mm.274693
10544815	2.18393	Up	3-hydroxyisobutyrate dehydrogenase	BC003914	Hibadh	NM_145567	Mm.286458///Mm.286458///Mm.286458
10544801	4.82782	Up	homeo box A11	U20370	Hoxa11	NM_010450	Mm.26954///Mm.26954///Mm.26954
10544798	3.45888	Up	homeo box A10	BC050839	Hoxa10	NM_008263|NM_001122950	Mm.5///Mm.5///Mm.5///Mm.5
10544788	3.59809	Up	homeo box A9	AB005457	Hoxa9	NM_010456	Mm.4694///Mm.4694///Mm.4694///Mm.4694
10544573	3.00227	Up	retinoic acid receptor responder (tazarotene induced) 2 | leucine rich repeat containing 61	BC015275|BC027309	Rarres2|Lrrc61	NM_027852	Mm.28231///Mm.28231///Mm.28231///Mm.290764
10544199	2.05897	Up	DENN/MADD domain containing 2A		Dennd2a	NM_172477	Mm.440021///Mm.440021
10544062	3.24792	Up	RIKEN cDNA D630045J12 gene	BC079889|AK129390|AK128948	D630045J12Rik		Mm.277163///Mm.277163///Mm.277163///Mm.277163///Mm.277163
10543959	6.79912	Up	pleiotrophin	BC061695	Ptn	NM_008973	Mm.279690///Mm.279690///Mm.279690///Mm.279690
10543145	4.90242	Up	thrombospondin, type I, domain containing 7A	AK173072	Thsd7a		Mm.320644///Mm.320644
10543134	2.56799	Up	NADH dehydrogenase (ubiquinone) 1 alpha subcomplex, 4	BC011114	Ndufa4	NM_010886	Mm.415865///Mm.431897///Mm.415865///Mm.431897///Mm.415865///Mm.431897
10543067	2.87144	Up	asparagine synthetase	U38940	Asns	NM_012055	Mm.2942///Mm.2942///Mm.2942///Mm.2942
10543031	2.03573	Up	solute carrier family 25 (mitochondrial carrier, adenine nucleotide translocator), member 13	AF164632	Slc25a13	NM_015829	Mm.24513///Mm.24513///Mm.24513
10542738	2.22605	Up	Ras association (RalGDS/AF-6) domain family (N-terminal) member 8	BC025009	Rassf8		Mm.158669///Mm.444985///Mm.158669///Mm.444985
10542575	2.76134	Up	phosphodiesterase 3A, cGMP inhibited	AF099187	Pde3a	NM_018779	Mm.103728///Mm.103728///Mm.103728///Mm.103728
10541873	2.13684	Up	mitochondrial ribosomal protein L51	BC094621	Mrpl51	NM_025595	Mm.138749///Mm.138749///Mm.138749
10541845	2.23477	Up	nucleolar protein 1	BC007151	Nol1	NM_138747	Mm.29203///Mm.29203///Mm.29203
10541729	2.05387	Up	cell division cycle associated 3	BC027172	Cdca3	NM_013538	Mm.285723///Mm.285723///Mm.285723
10541711	2.28073	Up	prohibitin 2	AY211613	Phb2	NM_007531	Mm.36241///Mm.36241///Mm.36241///Mm.36241
10541683	3.34107	Up	complement component 1, r subcomponent | complement component C1rb	AF459018|BC093528	C1r|C1rb	NM_023143|NM_001113356	Mm.333375///Mm.333375///Mm.333375///Mm.333375
10541496	4.451	Up	microfibrillar associated protein 5	AF180805	Mfap5	NM_015776	Mm.41931///Mm.41931///Mm.41931
10541354	3.28319	Up	alpha-2-macroglobulin	AY185125	A2m	NM_175628	Mm.30151///Mm.30151///Mm.30151
10541333	7.01904	Up	solute carrier family 6 (neurotransmitter transporter, betaine/GABA), member 12	BC019211	Slc6a12	NM_133661	Mm.274506///Mm.274506///Mm.274506
10541091	2.16804	Up	gem (nuclear organelle) associated protein 6	BC025157	Gemin6	NM_026053	Mm.279985///Mm.279985///Mm.279985
10541049	2.03894	Up	membrane-associated ring finger (C3HC4) 8	BC053090	2010-03-08	NM_027920	Mm.27064///Mm.27064///Mm.27064///Mm.27064///Mm.27064
10540248	3.34698	Up	microphthalmia-associated transcription factor	BC108976	Mitf	NM_001113198|NM_008601	Mm.333284///Mm.454504///Mm.333284///Mm.454504///Mm.333284///Mm.454504///Mm.333284///Mm.454504///Mm.333284///Mm.454504///Mm.333284///Mm.454504///Mm.333284///Mm.454504///Mm.333284///Mm.454504///Mm.333284///Mm.454504///Mm.333284///Mm.454504
10540085	2.62426	Up	fibulin 2	BC005443	Fbln2	NM_007992|NM_001081437	Mm.249146///Mm.249146///Mm.249146///Mm.249146///Mm.249146
10539873	2.21558	Up	GATA binding protein 2	AB000096	Gata2	NM_008090	Mm.272747///Mm.272747///Mm.272747
10539702	2.374	Up	RIKEN cDNA 2010309E21 gene	BC103775	2010309E21Rik		Mm.422972///Mm.422972
10539606	2.0326	Up	chaperonin subunit 7 (eta)	BC008255	Cct7	NM_007638	Mm.289900///Mm.289900///Mm.289900
10539111	5.82061	Up	transmembrane protein 150	BC014685	Tmem150	NM_144916	Mm.170023///Mm.170023///Mm.170023
10538932	2.33365	Up	S-adenosylmethionine decarboxylase 1 | S-adenosylmethionine decarboxylase 2 | S-adenosylmethionine decarboxylase, pseudogene 3	CT010192	Amd1|Amd2|Amd-ps3	NM_009665|NM_007444	Mm.253533///Mm.393970///Mm.253533///Mm.253533///Mm.253533
10538927	2.33212	Up	S-adenosylmethionine decarboxylase 1 | S-adenosylmethionine decarboxylase 2 | S-adenosylmethionine decarboxylase, pseudogene 3	CT010192	Amd1|Amd2|Amd-ps3	NM_009665|NM_007444	Mm.253533///Mm.393970///Mm.253533///Mm.253533///Mm.253533
10538842	2.3614	Up	guanine nucleotide binding protein (G protein), gamma 12	BC040685	Gng12	NM_025278	Mm.234342///Mm.234342///Mm.234342///Mm.234342///Mm.234342///Mm.234342///Mm.234342///Mm.234342///Mm.234342
10538832	2.38317	Up	MAD2 (mitotic arrest deficient, homolog)-like 1 (yeast)	BC089012	Mad2l1	NM_019499	Mm.290830///Mm.290830///Mm.290830///Mm.290830///Mm.290830
10538420	2.07412	Up	glycyl-tRNA synthetase	BC021747	Gars	NM_180678	Mm.250004///Mm.250004///Mm.250004
10538163	7.03101	Up	amiloride binding protein 1 (amine oxidase, copper-containing)	BC021880	Abp1	NM_029638	Mm.213898///Mm.213898///Mm.213898
10537184	2.04912	Up	caldesmon 1	BC019435	Cald1	NM_145575	Mm.308134///Mm.308134///Mm.308134///Mm.308134///Mm.308134///Mm.308134///Mm.308134///Mm.308134
10536917	2.01798	Up	smoothened homolog (Drosophila)	BC096028	Smo	NM_176996	Mm.29279///Mm.29279///Mm.29279
10536845	6.12601	Up	filamin C, gamma (actin binding protein 280)	AF119148	Flnc	NM_001081185	Mm.39046///Mm.39046///Mm.39046///Mm.39046
10536635	2.53836	Up	RIKEN cDNA A430107O13 gene		A430107O13Rik	NM_001081351	Mm.221404///Mm.221404///Mm.221404
10536429	2.5229	Up	transmembrane protein 106B	BC050246	Tmem106b	NM_027992	Mm.27742///Mm.27742///Mm.27742///Mm.27742
10536220	3.71497	Up	collagen, type I, alpha 2	BC007158	Col1a2	NM_007743	Mm.277792///Mm.277792///Mm.277792
10535883	2.11508	Up	katanin p60 subunit A-like 1	BC030434	Katnal1	NM_153572	Mm.441489///Mm.441489///Mm.441489///Mm.441489
10535025	2.06005	Up	glutamate oxaloacetate transaminase 2, mitochondrial	U82470	Got2	NM_010325	Mm.230169///Mm.230169///Mm.230169///Mm.230169///Mm.230169
10534974	2.42971	Up	minichromosome maintenance deficient 7 (S. cerevisiae)	BC065164	Mcm7	NM_008568	Mm.378965///Mm.378965///Mm.378965
10534862	3.19135	Up	procollagen C-endopeptidase enhancer protein	AB008548	Pcolce	NM_008788	Mm.262345///Mm.262345///Mm.262345
10534718	2.07465	Up	thyroid hormone receptor interactor 6	AF116823	Trip6	NM_011639	Mm.27063///Mm.27063///Mm.27063
10534343	4.29882	Up	elastin	BC051649	Eln	NM_007925	Mm.275320///Mm.275320///Mm.275320
10534324	3.20584	Up	LIM-domain containing, protein kinase	U14166	Limk1	NM_010717	Mm.15409///Mm.15409///Mm.15409///Mm.15409///Mm.15409
10533085	2.28193	Up	phosphatidylethanolamine binding protein 1	BC089332	Pebp1	NM_018858	Mm.195898///Mm.338476///Mm.195898///Mm.338476///Mm.195898///Mm.338476
10533050	4.38544	Up	heat shock protein 8	BC011219	Hspb8	NM_030704	Mm.21549///Mm.21549///Mm.21549
10532954	2.77881	Up	RIKEN cDNA 2410014A08 gene	AK129066	2410014A08Rik		Mm.153963///Mm.153963
10532944	2.33021	Up	RIKEN cDNA 2410014A08 gene	BC035300|BC058245|BC025208|AK129066	2410014A08Rik		Mm.153963///Mm.153963///Mm.153963///Mm.153963///Mm.153963///Mm.153963
10532085	2.49255	Up	transforming growth factor, beta receptor III	BC070428	Tgfbr3	NM_011578	Mm.200775///Mm.200775///Mm.200775
10531887	2.08813	Up	solute carrier family 10 (sodium/bile acid cotransporter family), member 6	BC127608	Slc10a6	NM_029415	Mm.7446///Mm.7446///Mm.7446
10531588	5.4609	Up	protein kinase, cGMP-dependent, type II	L12460	Prkg2	NM_008926	Mm.263002///Mm.263002///Mm.263002
10531544	3.61227	Up	progestin and adipoQ receptor family member III	AY424292	Paqr3	NM_198422	Mm.332505///Mm.332505///Mm.332505///Mm.332505
10531203	4.1189	Up	a disintegrin-like and metallopeptidase (reprolysin type) with thrombospondin type 1 motif, 3		Adamts3	NM_001081401	Mm.442129///Mm.442129///Mm.442129
10531201	5.78809	Up	a disintegrin-like and metallopeptidase (reprolysin type) with thrombospondin type 1 motif, 3		Adamts3	NM_001081401	Mm.442129///Mm.442129
10531197	5.16621	Up	a disintegrin-like and metallopeptidase (reprolysin type) with thrombospondin type 1 motif, 3		Adamts3	NM_001081401	Mm.442129///Mm.442129
10531195	5.36548	Up	a disintegrin-like and metallopeptidase (reprolysin type) with thrombospondin type 1 motif, 3		Adamts3	NM_001081401	Mm.442129///Mm.442129
10531193	4.18443	Up	a disintegrin-like and metallopeptidase (reprolysin type) with thrombospondin type 1 motif, 3		Adamts3	NM_001081401	Mm.442129///Mm.442129
10531191	5.5463	Up	a disintegrin-like and metallopeptidase (reprolysin type) with thrombospondin type 1 motif, 3		Adamts3	NM_001081401	Mm.442129///Mm.442129
10531189	4.28673	Up	a disintegrin-like and metallopeptidase (reprolysin type) with thrombospondin type 1 motif, 3		Adamts3	NM_001081401	Mm.442129///Mm.442129
10531187	4.41306	Up	a disintegrin-like and metallopeptidase (reprolysin type) with thrombospondin type 1 motif, 3		Adamts3	NM_001081401	Mm.442129///Mm.442129
10531185	4.62074	Up	a disintegrin-like and metallopeptidase (reprolysin type) with thrombospondin type 1 motif, 3		Adamts3	NM_001081401	Mm.442129///Mm.442129
10531183	5.20459	Up	a disintegrin-like and metallopeptidase (reprolysin type) with thrombospondin type 1 motif, 3		Adamts3	NM_001081401	Mm.442129///Mm.442129
10531181	4.73184	Up	a disintegrin-like and metallopeptidase (reprolysin type) with thrombospondin type 1 motif, 3		Adamts3	NM_001081401	Mm.442129///Mm.442129
10531179	4.9788	Up	a disintegrin-like and metallopeptidase (reprolysin type) with thrombospondin type 1 motif, 3		Adamts3	NM_001081401	Mm.442129///Mm.442129
10531177	5.01215	Up	a disintegrin-like and metallopeptidase (reprolysin type) with thrombospondin type 1 motif, 3		Adamts3	NM_001081401	Mm.442129///Mm.442129
10531175	4.94892	Up	a disintegrin-like and metallopeptidase (reprolysin type) with thrombospondin type 1 motif, 3		Adamts3	NM_001081401	Mm.442129///Mm.442129
10531173	5.05209	Up	a disintegrin-like and metallopeptidase (reprolysin type) with thrombospondin type 1 motif, 3		Adamts3	NM_001081401	Mm.442129///Mm.442129
10531166	4.67228	Up	a disintegrin-like and metallopeptidase (reprolysin type) with thrombospondin type 1 motif, 3		Adamts3	NM_001081401	Mm.442129///Mm.442129
10530201	2.40066	Up	UDP-glucose dehydrogenase	BC006749	Ugdh	NM_009466	Mm.344831///Mm.344831///Mm.344831
10529656	2.40952	Up	neuron specific gene family member 1	BC008272	Nsg1	NM_010942	Mm.7414///Mm.7414///Mm.7414
10529264	4.26007	Up	spondin 2, extracellular matrix protein	BC017616	Spon2	NM_133903	Mm.34694///Mm.34694///Mm.34694
10528702	2.17539	Up	protein kinase, AMP-activated, gamma 2 non-catalytic subunit	BC015283	Prkag2	NM_145401	Mm.33649///Mm.33649///Mm.33649///Mm.33649///Mm.33649///Mm.33649
10528170	2.03198	Up	cytochrome c, somatic | similar to cytochrome c	BC092213	Cycs|LOC672195		Mm.35389///Mm.35389///Mm.391918
10528143	2.92791	Up
10528008	4.63846	Up	six transmembrane epithelial antigen of prostate 2		Steap2	NM_001103157|NM_028734|NM_001103156	Mm.274956///Mm.274956///Mm.274956///Mm.274956///Mm.274956///Mm.274956///Mm.274956
10527936	2.88361	Up	frizzled homolog 1 (Drosophila)	BC053010	Fzd1	NM_021457	Mm.246003///Mm.246003///Mm.246003
10527888	2.02619	Up	GATA zinc finger domain containing 1	AB047921	Gatad1	NM_026033	Mm.469929///Mm.469929///Mm.469929
10527649	7.65849	Up	RIKEN cDNA 6330406I15 gene	BC116246	6330406I15Rik	NM_027519	Mm.252139///Mm.252139///Mm.252139
10526241	2.07278	Up	claudin 3	AF095905	Cldn3	NM_009902	Mm.158662///Mm.158662///Mm.158662
10526069	2.19605	Up	chaperonin subunit 6a (zeta)	BC094352	Cct6a	NM_009838	Mm.360232///Mm.360232///Mm.360232
10525591	2.31555	Up	kinetochore associated 1		Kntc1	NM_001042421	Mm.441089///Mm.441089
10525016	2.05436	Up	T-box 3	BC096551	Tbx3	NM_011535|NM_198052	Mm.219139///Mm.219139///Mm.219139///Mm.219139///Mm.219139
10523595	2.44044	Up	protein tyrosine phosphatase, non-receptor type 13	D83966	Ptpn13	NM_011204	Mm.3414///Mm.3414///Mm.3414///Mm.3414
10523190	3.66785	Up	RIKEN cDNA 9130213B05 gene	BC006604|EF564364	9130213B05Rik		Mm.5002///Mm.5002///Mm.5002
10522530	3.86673	Up	kit oncogene	BC052457	Kit	NM_001122733|NM_021099	Mm.247073///Mm.247073///Mm.247073///Mm.247073
10522503	4.40083	Up	platelet derived growth factor receptor, alpha polypeptide	M84607	Pdgfra	NM_011058|NM_001083316	Mm.221403///Mm.221403///Mm.221403///Mm.221403
10522368	3.54665	Up	NIPA-like domain containing 1	BC125447	Npal1	NM_001081205	Mm.38884///Mm.38884///Mm.38884
10521972	5.44856	Up	protocadherin 7	AB006758	Pcdh7	NM_018764|NM_001122758	Mm.332387///Mm.332387///Mm.332387///Mm.332387///Mm.332387
10521757	2.02866	Up
10521731	2.47817	Up	on-SMC condensin I complex, subunit G		Ncapg	NM_019438	Mm.32012///Mm.32012
10521090	2.16796	Up	transforming, acidic coiled-coil containing protein 3	AF156934	Tacc3	NM_001040435	Mm.379024///Mm.379024///Mm.379024///Mm.379024///Mm.379024///Mm.379024
10520650	3.35599	Up	carbamoyl-phosphate synthetase 2, aspartate transcarbamylase, and dihydroorotase	BC053097	Cad	NM_023525	Mm.305535///Mm.305535///Mm.305535///Mm.305535///Mm.305535
10520604	2.59153	Up	elastin microfibril interfacer 1	BC005481	Emilin1	NM_133918	Mm.286375///Mm.286375///Mm.286375
10519886	2.51909	Up	sema domain, immunoglobulin domain (Ig), short basic domain, secreted, (semaphorin) 3C	BC066852	Sema3c	NM_013657	Mm.5071///Mm.5071///Mm.5071
10519855	2.61457	Up	calcium channel, voltage-dependent, alpha2/delta subunit 1		Cacna2d1	NM_001110843|NM_001110844|NM_001110845|NM_001110846|NM_009784	Mm.159842///Mm.159842///Mm.159842///Mm.159842///Mm.159842///Mm.159842
10519815	2.21962	Up	calcium channel, voltage-dependent, alpha2/delta subunit 1	U73483	Cacna2d1	NM_001110843|NM_001110844|NM_001110845|NM_001110846|NM_009784	Mm.159842///Mm.159842///Mm.159842///Mm.159842///Mm.159842///Mm.159842///Mm.159842///Mm.159842///Mm.159842
10519747	2.42125	Up	sema domain, immunoglobulin domain (Ig), short basic domain, secreted, (semaphorin) 3E | hypothetical protein LOC100044162	BC057956	Sema3e|LOC100044162	NM_011348	Mm.134093///Mm.134093///Mm.134093
10519717	2.12295	Up	sema domain, immunoglobulin domain (Ig), short basic domain, secreted, (semaphorin) 3A | hypothetical protein LOC100044161	D85028	Sema3a|LOC100044161	NM_009152	Mm.372039///Mm.372039///Mm.372039///Mm.372039
10519183	2.59146	Up	ATPase family, AAA domain containing 3A	BC058373	Atad3a	NM_179203	Mm.241152///Mm.241152///Mm.241152///Mm.241152
10519140	2.61019	Up	matrix metallopeptidase 23	AF085742	Mmp23	NM_011985	Mm.29373///Mm.29373///Mm.29373
10518967	2.4054	Up	RIKEN cDNA 1190007F08 gene	BC099522|BC055936	1190007F08Rik		Mm.260690///Mm.260690///Mm.260690
10518726	2.53045	Up	solute carrier family 25, member 33	BC011293	Slc25a33	NM_027460	Mm.41877///Mm.41877///Mm.41877
10517706	2.04187	Up	MRT4, mRNA turnover 4, homolog (S. cerevisiae)	BC005734	Mrto4	NM_023536	Mm.296860///Mm.441201///Mm.296860///Mm.441201///Mm.296860///Mm.441201///Mm.296860///Mm.441201
10517677	2.91761	Up	neuroblastoma, suppression of tumorigenicity 1	D50263	Nbl1	NM_008675	Mm.9404///Mm.9404///Mm.9404
10517488	3.08937	Up	Eph receptor B2	BC043088	Ephb2	NM_010142	Mm.250981///Mm.250981///Mm.250981///Mm.250981///Mm.250981
10516735	2.61258	Up	tubulointerstitial nephritis antigen-like	AB050626	Tinagl	NM_023476	Mm.15801///Mm.15801///Mm.15801///Mm.15801///Mm.15801///Mm.15801///Mm.15801
10516590	2.14053	Up	RIKEN cDNA 2410081M15 gene	BC017614	2410081M15Rik	NM_028603	Mm.32997///Mm.32997///Mm.32997
10516246	2.17585	Up	cell division cycle associated 8	AY550907	Cdca8	NM_026560	Mm.28038///Mm.28038///Mm.28038///Mm.28038///Mm.28038
10516064	4.01627	Up	major facilitator superfamily domain containing 2	BC046793	Mfsd2	NM_029662	Mm.331842///Mm.331842///Mm.331842
10515943	2.72821	Up	cytidine 5'-triphosphate synthase	BC006698	Ctps	NM_016748	Mm.1815///Mm.1815///Mm.1815
10515836	4.1596	Up	cyclin B1	BC085238	Ccnb1		Mm.260114///Mm.380027
10515744	2.02185	Up	cell division cycle 20 homolog (S. cerevisiae)	AF312208	Cdc20	NM_023223	Mm.289747///Mm.289747///Mm.289747
10515431	2.38527	Up	kinesin family member 2C	BC006841	Kif2c	NM_134471	Mm.247651///Mm.247651///Mm.247651///Mm.247651
10515363	2.2064	Up	methylmalonic aciduria cblC type, with homocystinuria	BC054756	Mmachc	NM_025962	Mm.252785///Mm.252785///Mm.252785
10515257	2.12799	Up	RAD54 like (S. cerevisiae)	BC021643	Rad54l	NM_009015|NM_001122958|NM_001122959	Mm.3655///Mm.3655///Mm.3655///Mm.3655///Mm.3655///Mm.3655
10514933	2.22244	Up	carnitine palmitoyltransferase 2	U01163	Cpt2	NM_009949	Mm.307620///Mm.307620///Mm.307620///Mm.307620///Mm.307620///Mm.307620
10514865	2.69124	Up	acyl-CoA thioesterase 11	BC042492	Acot11	NM_025590	Mm.274924///Mm.274924///Mm.274924///Mm.274924
10514779	2.54446	Up	protein kinase, AMP-activated, alpha 2 catalytic subunit		Prkaa2	NM_178143	Mm.48638///Mm.48638
10514088	4.22523	Up	Fras1 related extracellular matrix protein 1	AB160986	Frem1	NM_177863	Mm.242337///Mm.242337///Mm.242337///Mm.242337
10513608	2.17286	Up	aminolevulinate, delta-, dehydratase	BC055930	Alad	NM_008525	Mm.6988///Mm.6988///Mm.6988///Mm.6988
10513256	3.74891	Up	lysophosphatidic acid receptor 1	BC025425	Lpar1	NM_010336|NM_172989	Mm.4772///Mm.4772///Mm.4772///Mm.4772///Mm.4772///Mm.4772///Mm.4772///Mm.4772///Mm.4772
10513208	3.21342	Up	sushi, von Willebrand factor type A, EGF and pentraxin domain containing 1	AF206329	Svep1	NM_022814	Mm.261024///Mm.261024///Mm.261024
10513158	2.22871	Up	protein tyrosine phosphatase, non-receptor type 3		Ptpn3		Mm.439128///Mm.462295///Mm.439128///Mm.462295
10513154	2.01132	Up	protein tyrosine phosphatase, non-receptor type 3		Ptpn3		Mm.439128///Mm.462295///Mm.439128///Mm.462295
10513145	2.58073	Up	protein tyrosine phosphatase, non-receptor type 3	X82561	Ptpn3		Mm.439128///Mm.462295///Mm.439128///Mm.462295///Mm.439128///Mm.462295
10513141	2.99152	Up	protein tyrosine phosphatase, non-receptor type 3		Ptpn3		Mm.439128///Mm.462295///Mm.439128///Mm.462295
10513061	3.93364	Up	catenin (cadherin associated protein), alpha-like 1	BC050070	Ctnnal1	NM_018761	Mm.218891///Mm.218891///Mm.218891///Mm.218891
10512935	2.85568	Up	S-adenosylmethionine decarboxylase 1 | S-adenosylmethionine decarboxylase, pseudogene 3	CT010192	Amd1|Amd-ps3	XR_032961	Mm.253533///Mm.253533///Mm.253533///Mm.253533
10512901	2.09393	Up	mitochondrial ribosomal protein L50	BC021318	Mrpl50	NM_178603	Mm.30052///Mm.30052///Mm.30052
10512093	2.01908	Up	NADH dehydrogenase (ubiquinone) 1 beta subcomplex, 6		Ndufb6	NM_001033305	Mm.1103///Mm.1103///Mm.1103
10511363	3.44164	Up	preproenkephalin 1	M55181	Penk1	NM_001002927	Mm.2899///Mm.2899///Mm.2899///Mm.2899
10510391	3.11875	Up	spermidine synthase	BC005566	Srm	NM_009272	Mm.10///Mm.10///Mm.10
10510286	2.30299	Up	MAD2 mitotic arrest deficient-like 2 (yeast)	BC011282	Mad2l2	NM_027985	Mm.9648///Mm.9648///Mm.9648///Mm.9648///Mm.9648///Mm.9648
10509838	5.13076	Up	peptidyl arginine deiminase, type II	D16580	Padi2	NM_008812	Mm.2296///Mm.2296///Mm.2296
10509820	2.29166	Up	regulator of chromosome condensation 2	BC086666	Rcc2	NM_173867	Mm.473710///Mm.473710///Mm.473710///Mm.473710
10509273	2.26571	Up	wingless-related MMTV integration site 4		Wnt4
10509267	3.0316	Up	wingless-related MMTV integration site 4	BC103560	Wnt4	NM_009523	Mm.20355///Mm.20355///Mm.20355
10508961	5.33914	Up	solute carrier family 30 (zinc transporter), member 2	BC013478	Slc30a2	NM_001039677	Mm.358876///Mm.358876///Mm.358876
10508829	2.34373	Up	mitogen-activated protein kinase kinase kinase 6	AB021861	Map3k6	NM_016693	Mm.36640///Mm.36640///Mm.36640
10508420	2.0363	Up	tyrosyl-tRNA synthetase	BC013552	Yars	NM_134151	Mm.145488///Mm.145488///Mm.145488///Mm.145488
10507851	2.16804	Up	poly A binding protein, cytoplasmic 4 | predicted gene, OTTMUSG00000007757	BC056432	Pabpc4|OTTMUSG00000007757	NM_130881|NM_148917	Mm.277091///Mm.277091///Mm.277091///Mm.277091///Mm.277091///Mm.277091///Mm.277091///Mm.277091///Mm.277091
10507612	2.53671	Up	leprecan 1	BC024047	Lepre1	NM_019783|NM_001042411|NM_019782	Mm.27961///Mm.27961///Mm.27961///Mm.27961///Mm.27961///Mm.27961///Mm.27961///Mm.27961
10507594	2.89041	Up	solute carrier family 2 (facilitated glucose transporter), member 1	M23384	Slc2a1	NM_011400	Mm.21002///Mm.21002///Mm.21002
10507471	2.07622	Up	similar to DNA-directed RNA polymerase II 7.6 kDa polypeptide (RPB10) (RPB7.6) (RPABC5)		LOC630172	XM_903276
10507347	2.23524	Up	testis-specific kinase 2	BC019149	Tesk2	NM_146151	Mm.425201///Mm.425201///Mm.425201///Mm.425201///Mm.425201///Mm.425201///Mm.425201
10507250	2.09641	Up	protein O-linked mannose beta1,2-N-acetylglucosaminyltransferase	AB053220	Pomgnt1	NM_026651|NM_029786	Mm.196045///Mm.196045///Mm.196045///Mm.196045///Mm.196045///Mm.196045///Mm.196045///Mm.196045
10507112	2.00738	Up	Scl/Tal1 interrupting locus	BC060706	Stil	NM_009185	Mm.3988///Mm.3988///Mm.3988///Mm.3988
10506767	2.2267	Up	enoyl Coenzyme A hydratase domain containing 2	BC025104	Echdc2	NM_026728	Mm.270783///Mm.270783///Mm.270783///Mm.270783///Mm.270783///Mm.270783///Mm.270783///Mm.270783///Mm.270783///Mm.270783///Mm.270783///Mm.270783
10506701	2.04007	Up	GLIS family zinc finger 1	AF486579	Glis1	NM_147221	Mm.331757///Mm.331757///Mm.331757///Mm.331757
10506680	3.63947	Up	transmembrane protein 48	BC021337	Tmem48	NM_028355	Mm.28478///Mm.28478///Mm.28478
10506603	2.57191	Up	single-stranded DNA binding protein 3	AF500117	Ssbp3	NM_023672|NM_198438	Mm.195635///Mm.195635///Mm.195635///Mm.195635///Mm.195635///Mm.195635///Mm.195635///Mm.195635
10506571	4.73109	Up	24-dehydrocholesterol reductase	BC019797	Dhcr24	NM_053272	Mm.133370///Mm.133370///Mm.133370
10506201	4.06197	Up	receptor tyrosine kinase-like orphan receptor 1	AB010383	Ror1	NM_013845	Mm.57252///Mm.57252///Mm.57252
10506188	2.07052	Up	phosphoglucomutase 2 | phosphoglucomutase 1	BC008527	Pgm2|Pgm1	NM_028132	Mm.217764///Mm.2325///Mm.217764///Mm.217764///Mm.2325///Mm.217764
10506118	3.4895	Up	ubiquitin specific peptdiase 1	BC018179	Usp1	NM_146144	Mm.371692///Mm.371692///Mm.371692///Mm.371692
10505791	2.49164	Up		AK122556	BC057079	NM_001081184	Mm.287210///Mm.287210///Mm.287210///Mm.287210///Mm.287210///Mm.287210
10505187	2.46961	Up	UDP-glucose ceramide glucosyltransferase	BC050828	Ugcg	NM_011673	Mm.198803///Mm.198803///Mm.198803
10505143	2.08166	Up	A kinase (PRKA) anchor protein 2 | paralemmin 2 | Palm2-Akap2 protein	AF064781	Akap2|Palm2|Palm2-akap2		Mm.331630///Mm.440076///Mm.331630///Mm.440076///Mm.331630///Mm.440076///Mm.331630///Mm.440076///Mm.331630///Mm.440076///Mm.331630///Mm.440076
10504957	2.0325	Up	structural maintenance of chromosomes 2	BC094380	Smc2	NM_008017	Mm.2999///Mm.2999///Mm.2999
10504534	2.37647	Up	FERM and PDZ domain containing 1		Frmpd1	NM_001081172	Mm.24783///Mm.24783///Mm.24783
10504470	2.18911	Up	maternal embryonic leucine zipper kinase	BC085276	Melk	NM_010790	Mm.268668///Mm.268668///Mm.268668///Mm.268668///Mm.268668
10503023	3.52217	Up	cystathionase (cystathionine gamma-lyase)	BC019483	Cth	NM_145953	Mm.28301///Mm.28301///Mm.28301
10502863	2.49202	Up	adenylate kinase 5	AB060081	Ak5	NM_001081277	Mm.207057///Mm.207057///Mm.207057
10502205	2.1237	Up	hydroxyacyl-Coenzyme A dehydrogenase	D29639	Hadh	NM_008212	Mm.260164///Mm.260164///Mm.260164
10501903	2.30085	Up	synaptopodin 2	AJ306625	Synpo2		Mm.317009///Mm.317009
10501879	4.3342	Up	ubiquitin specific peptidase 53	BC132339	Usp53	NM_133857	Mm.219684///Mm.219684///Mm.219684
10501762	2.91262	Up	sorting nexin 7	BC087942	Snx7	NM_029655	Mm.33824///Mm.33824///Mm.33824///Mm.33824
10501402	2.17472	Up	G-protein signalling modulator 2 (AGS3-like, C. elegans)	AY081187	Gpsm2	NM_029522	Mm.226941///Mm.226941///Mm.226941
10501222	2.178	Up	glutathione S-transferase, mu 2	J04696	Gstm2	NM_008183	Mm.440086///Mm.440086///Mm.440086
10500808	3.33746	Up	olfactomedin-like 3	BC005485	Olfml3	NM_133859	Mm.211535///Mm.211535///Mm.211535
10500204	2.1247	Up	extracellular matrix protein 1	L33416	Ecm1	NM_007899	Mm.3433///Mm.3433///Mm.3433///Mm.3433
10500021	2.18538	Up	cingulin	BC108378|BC052941|BC087546	Cgn		Mm.87634///Mm.87634///Mm.87634///Mm.87634///Mm.87634///Mm.87634///Mm.87634
10500011	6.28652	Up	tuftelin 1	BC019213	Tuft1	NM_011656	Mm.10214///Mm.10214///Mm.10214///Mm.10214
10499639	2.80272	Up	CDC28 protein kinase 1b	BC076579	Cks1b	NM_016904	Mm.3049///Mm.3049///Mm.3049
10499483	2.21424	Up	farnesyl diphosphate synthetase	BC048497	Fdps	NM_134469	Mm.39472///Mm.39472///Mm.39472
10499394	2.45224	Up	lamin A	BC015302	Lmna	NM_001002011|NM_001111102|NM_019390	Mm.472685///Mm.472685///Mm.472685///Mm.472685///Mm.472685///Mm.472685
10499247	4.63295	Up	neurotrophic tyrosine kinase, receptor, type 1		Ntrk1	NM_001033124	Mm.80682///Mm.80682
10499168	3.48221	Up	kin of IRRE like (Drosophila)	AF480411	Kirrel	NM_130867	Mm.89552///Mm.89552///Mm.89552
10499045	2.2575	Up	tripartite motif-containing 2	AB043550	Trim2	NM_030706	Mm.44876///Mm.44876///Mm.44876///Mm.44876///Mm.44876///Mm.44876///Mm.44876///Mm.44876///Mm.44876
10498935	2.99444	Up	guanylate cyclase 1, soluble, beta 3	BC050945	Gucy1b3	NM_017469	Mm.9445///Mm.9445///Mm.9445
10498921	4.14373	Up	tryptophan 2,3-dioxygenase	BC018390	Tdo2	NM_019911	Mm.258622///Mm.258622///Mm.258622
10498871	3.12864	Up	transmembrane protein 144	BC018493	Tmem144	NM_027495	Mm.46635///Mm.46635///Mm.46635
10498647	4.75444	Up	UDP-GalNAc:betaGlcNAc beta 1,3-galactosaminyltransferase, polypeptide 1	BC003835	B3galnt1	NM_020026	Mm.153710///Mm.153710///Mm.153710
10498620	2.63418	Up	tripartite motif-containing 59 | similar to mouse RING finger 1	BC025430	Trim59|LOC630539	NM_025863	Mm.176695///Mm.176695///Mm.176695///Mm.176695
10498485	2.14594	Up	solute carrier family 33 (acetyl-CoA transporter), member 1	BC054395	Slc33a1	NM_015728	Mm.135619///Mm.135619///Mm.135619
10498309	3.32247	Up	profilin 2	BC024363	Pfn2	NM_019410	Mm.271744///Mm.271744///Mm.271744
10497964	2.097	Up	progesterone receptor membrane component 2	BC044759	Pgrmc2		Mm.40321///Mm.40321
10497831	2.57958	Up	cyclin A2	BC052730	Ccna2	NM_009828	Mm.4189///Mm.4189///Mm.4189
10497808	2.10104	Up	G protein-coupled receptor 103	BC096610	Gpr103	NM_198192	Mm.330975///Mm.330975///Mm.330975
10497773	3.60344	Up	methylcrotonoyl-Coenzyme A carboxylase 1 (alpha)	AF310338	Mccc1	NM_023644	Mm.249016///Mm.249016///Mm.249016
10497520	2.84953	Up	ect2 oncogene	BC025565	Ect2	NM_007900	Mm.261453///Mm.261453///Mm.261453///Mm.261453///Mm.261453///Mm.261453///Mm.261453
10497503	3.17316	Up	karyopherin (importin) alpha 2 | similar to nuclear pore-targeting complex component of 58 kDa	D55720	Kpna2|LOC100039592|LOC100043906	NM_010655|XR_032285|XR_034361|XR_034991|XR_032234	Mm.12508///Mm.391577///Mm.423000///Mm.12508///Mm.391577///Mm.423000///Mm.12508///Mm.391577///Mm.423000///Mm.12508///Mm.391577///Mm.423000///Mm.12508///Mm.391577///Mm.423000///Mm.12508///Mm.391577///Mm.423000///Mm.12508///Mm.391577///Mm.423000///Mm.12508///Mm.391577///Mm.423000///Mm.12508///Mm.391577///Mm.423000///Mm.12508///Mm.391577///Mm.423000///Mm.12508///Mm.391577///Mm.423000
10497122	2.17416	Up	DEP domain containing 1a	BC023934	Depdc1a	NM_029523	Mm.371655///Mm.371655///Mm.371655///Mm.371655
10497105	2.20493	Up	leucine rich repeat containing 40	BC002279	Lrrc40	NM_024194	Mm.358704///Mm.358704///Mm.358704
10496438	2.27441	Up	alcohol dehydrogenase 1 (class I)	BC013477	Adh1	NM_007409	Mm.2409///Mm.2409///Mm.2409
10495891	3.20074	Up	arylsulfatase J	BC117813	Arsj	NM_173451	Mm.317021///Mm.317021///Mm.317021
10495659	2.32888	Up	calponin 3, acidic	BC055711	Cnn3	NM_028044	Mm.275555///Mm.275555///Mm.275555
10495243	3.0992	Up	glutathione S-transferase, mu 5	BC008206	Gstm5	NM_010360	Mm.282351///Mm.282351///Mm.282351
10495083	4.12064	Up	potassium voltage-gated channel, Shal-related family, member 3	AF107781	Kcnd3	NM_001039347|NM_019931	Mm.44530///Mm.44530///Mm.44530///Mm.44530///Mm.44530
10494643	4.92033	Up	3-hydroxy-3-methylglutaryl-Coenzyme A synthase 2	BC014714	Hmgcs2	NM_008256	Mm.289131///Mm.289131///Mm.289131
10494405	2.93111	Up	histone cluster 2, H3b | histone cluster 2, H3c1 | histone cluster 2, H3c2 | histone cluster 1, H3b | histone cluster 1, H3d | histone cluster 1, H3e | histone cluster 1, H3f | histone cluster 1, H3c | histone cluster 1, H3h | histone cluster 1, H3i | histone cluster 1, H3a | histone cluster 1, H3g	BC132488|BC116383	Hist2h3b|Hist2h3c1|Hist2h3c2|Hist1h3b|Hist1h3d|Hist1h3e|Hist1h3f|Hist1h3c|Hist1h3h|Hist1h3i|Hist1h3a|Hist1h3g	NM_178215|NM_019469|NM_178203|NM_178204|NM_178205	Mm.383293///Mm.422680///Mm.358797///Mm.342457///Mm.347699///Mm.261658///Mm.221389///Mm.261658///Mm.262517///Mm.342457///Mm.347699///Mm.358797///Mm.383293///Mm.422680///Mm.221301///Mm.261657///Mm.377874///Mm.390558///Mm.390558
10494402	2.61369	Up	histone cluster 2, H3c1 | histone cluster 2, H3b | histone cluster 2, H3c2 | histone cluster 1, H3b | histone cluster 1, H3d | histone cluster 1, H3e | histone cluster 1, H3f | histone cluster 1, H3c | histone cluster 1, H3h | histone cluster 1, H3i | histone cluster 1, H3a | histone cluster 1, H3g	BC132488|BC116383|BC080809	Hist2h3c1|Hist2h3b|Hist2h3c2|Hist1h3b|Hist1h3d|Hist1h3e|Hist1h3f|Hist1h3c|Hist1h3h|Hist1h3i|Hist1h3a|Hist1h3g	NM_178216|NM_178215|NM_019469|NM_178203|NM_178204|NM_178205	Mm.383293///Mm.422680///Mm.383293///Mm.422680///Mm.358797///Mm.342457///Mm.347699///Mm.261658///Mm.221389///Mm.261658///Mm.262517///Mm.342457///Mm.347699///Mm.358797///Mm.383293///Mm.422680///Mm.221389///Mm.261658///Mm.262517///Mm.342457///Mm.347699///Mm.358797///Mm.383293///Mm.422680///Mm.221389///Mm.261658///Mm.262517///Mm.342457///Mm.347699///Mm.358797///Mm.383293///Mm.422680///Mm.221301///Mm.…
10494262	2.92705	Up	cathepsin K	BC046320	Ctsk	NM_007802	Mm.272085///Mm.272085///Mm.272085
10494114	2.62955	Up	selenium binding protein 1 | selenium binding protein 2 | hypothetical protein LOC100044204	BC011202|BC024106	Selenbp1|Selenbp2|LOC100044204	NM_009150	Mm.196558///Mm.196558///Mm.225405///Mm.196558///Mm.196558
10493820	2.34793	Up	S100 calcium binding protein A6 (calcyclin)	BC010774	S100a6	NM_011313	Mm.100144///Mm.100144///Mm.100144
10493193	2.40937	Up	chaperonin subunit 3 (gamma)	L20509	Cct3	NM_009836	Mm.256034///Mm.256034///Mm.256034
10492864	2.22227	Up	SH3 domain protein D19	D89677	Sh3d19	NM_001082414	Mm.2454///Mm.2454///Mm.2454///Mm.2454
10492826	2.08075	Up	F-box and WD-40 domain protein 7, archipelago homolog (Drosophila)	BC085184	Fbxw7	NM_080428	Mm.196475///Mm.196475///Mm.196475///Mm.196475
10492798	2.02295	Up	secreted frizzled-related protein 2	BC014722	Sfrp2	NM_009144	Mm.19155///Mm.19155///Mm.19155
10492699	2.852	Up	cathepsin O	BC098219	Ctso	NM_177662	Mm.254642///Mm.254642///Mm.254642
10492689	4.2673	Up	platelet-derived growth factor, C polypeptide	AF266467	Pdgfc	NM_019971	Mm.331089///Mm.331089///Mm.331089
10492598	2.00849	Up	NMD3 homolog (S. cerevisiae)	BC003842	Nmd3	NM_133787	Mm.21062///Mm.21062///Mm.21062
10492426	2.17764	Up	acyl-CoA synthetase family member 2	BC018371	Acsf2
10492355	5.24991	Up	membrane metallo endopeptidase	BC034092	Mme	NM_008604	Mm.296022///Mm.296022///Mm.296022///Mm.296022
10492091	2.47455	Up	MAD homolog 9 (Drosophila)	AY145520	Smad9	NM_019483	Mm.244353///Mm.244353///Mm.244353
10491805	2.05039	Up	polo-like kinase 4 (Drosophila)	BC026785	Plk4	NM_011495	Mm.3794///Mm.3794///Mm.3794
10491526	2.00862	Up	acyl-Coenzyme A dehydrogenase family, member 9	BC031137	Acad9	NM_172678	Mm.260997///Mm.260997///Mm.260997
10491279	2.99086	Up	protein kinase C, iota	AK220517	Prkci	NM_008857	Mm.291554///Mm.291554///Mm.291554///Mm.291554
10490903	3.80979	Up	carbonic anhydrase 13	BC064050	Car13	NM_024495	Mm.158776///Mm.158776///Mm.158776
10490818	3.25787	Up	stathmin-like 2	BC026538	Stmn2	NM_025285	Mm.29580///Mm.29580///Mm.29580///Mm.29580
10490384	4.26584	Up	laminin, alpha 5		Lama5	NM_001081171	Mm.4339///Mm.4339///Mm.4339
10490104	2.43392	Up	aurora kinase A	BC014711	Aurka	NM_011497	Mm.249363///Mm.249363///Mm.249363///Mm.249363///Mm.249363
10489759	2.12959	Up	sulfatase 2	AY101177	Sulf2	NM_028072	Mm.383702///Mm.383702///Mm.383702///Mm.383702
10488816	2.1319	Up	S-adenosylhomocysteine hydrolase	BC086781	Ahcy	NM_016661	Mm.330692///Mm.371964///Mm.330692///Mm.371964///Mm.330692///Mm.371964///Mm.330692///Mm.371964
10488233	2.29704	Up			EG433481
10487722	2.01855	Up	solute carrier family 4, sodium bicarbonate transporter-like, member 11	BC111884	Slc4a11	NM_001081162	Mm.441391///Mm.441391///Mm.441391
10487480	2.51621	Up	budding uninhibited by benzimidazoles 1 homolog (S. cerevisiae)	AF002823	Bub1	NM_001113179|NM_009772	Mm.2185///Mm.2185///Mm.2185///Mm.2185
10487392	2.14283	Up	Kv channel interacting protein 3, calsenilin	BC026980	Kcnip3	NM_019789|NM_001111331	Mm.315292///Mm.315292///Mm.315292///Mm.315292///Mm.315292///Mm.315292///Mm.315292
10487340	2.10134	Up	non-SMC condensin I complex, subunit H	BC025060	Ncaph	NM_144818	Mm.29786///Mm.29786///Mm.29786///Mm.29786
10487267	2.20051	Up	polymerase (RNA) II (DNA directed) polypeptide L		Polr2l
10487040	5.93475	Up	fibrillin 1	AF007248	Fbn1	NM_007993	Mm.271644///Mm.271644///Mm.271644///Mm.271644
10485645	5.08136	Up	reticulocalbin 1	D13003	Rcn1	NM_009037	Mm.4876///Mm.4876///Mm.4876
10485624	2.3278	Up	proline rich Gla (G-carboxyglutamic acid) 4 (transmembrane) | similar to Transmembrane gamma-carboxyglutamic acid protein 4 precursor (Proline-rich Gla protein 4) (Proline-rich gamma-carboxyglutamic acid protein 4)	BC099390	Prrg4|LOC676960	NM_178695	Mm.259609///Mm.259609///Mm.259609
10484463	3.82342	Up	serine (or cysteine) peptidase inhibitor, clade G, member 1	AF010254	Serping1	NM_009776	Mm.38888///Mm.38888///Mm.38888///Mm.38888///Mm.38888
10484431	2.10087	Up	thioredoxin domain containing 14	BC110994	Txndc14	NM_025868	Mm.371621///Mm.371621
10484207	3.07377	Up	RIKEN cDNA 2610301F02 gene		2610301F02Rik		Mm.26579///Mm.26579///Mm.26579
10484203	2.74415	Up	RIKEN cDNA 2610301F02 gene		2610301F02Rik
10484201	4.95692	Up	RIKEN cDNA 2610301F02 gene		2610301F02Rik
10484197	2.78702	Up	RIKEN cDNA 2610301F02 gene		2610301F02Rik
10483756	2.64633	Up	ATP synthase, H+ transporting, mitochondrial F0 complex, subunit c (subunit 9), isoform 3	BC116218	Atp5g3	NM_175015	Mm.2966///Mm.2966///Mm.2966///Mm.2966
10483719	4.9873	Up	chimerin (chimaerin) 1	BC054770	Chn1	NM_001113246|NM_175752|NM_029716	Mm.257073///Mm.257073///Mm.257073///Mm.257073///Mm.257073///Mm.257073///Mm.257073
10483679	2.40295	Up	G protein-coupled receptor 155 | trans-acting transcription factor 9	BC115698	Gpr155|Sp9	NM_001080707	Mm.241098///Mm.241098///Mm.241098///Mm.241098///Mm.330293///Mm.241098///Mm.330293///Mm.241098///Mm.330293///Mm.241098///Mm.241098///Mm.330293
10483401	2.04538	Up	SPC25, NDC80 kinetochore complex component, homolog (S. cerevisiae)	BC033605	Spc25	NM_025565	Mm.272969///Mm.272969///Mm.272969
10482968	5.12529	Up	phospholipase A2 receptor 1	D30779	Pla2r1	NM_008867	Mm.5092///Mm.5092///Mm.5092///Mm.5092
10482762	2.39195	Up	isopentenyl-diphosphate delta isomerase	BC110313	Idi1	NM_145360|NM_177960	Mm.29847///Mm.29847///Mm.29847///Mm.29847
10481518	4.47462	Up	prostaglandin E synthase	BC024960	Ptges	NM_022415	Mm.28768///Mm.28768///Mm.28768///Mm.28768///Mm.28768
10481383	2.04357	Up	WD repeat domain 34	BC085113	Wdr34	NM_001008498	Mm.88053///Mm.88053///Mm.88053///Mm.88053
10481186	2.06041	Up	sarcosine dehydrogenase	BC003456	Sardh	NM_138665	Mm.278467///Mm.278467///Mm.278467///Mm.278467
10480432	2.23041	Up	microtubule associated serine/threonine kinase-like	BC103779	Mastl	NM_025979	Mm.253721///Mm.253721///Mm.253721
10479981	6.32083	Up	GATA binding protein 3	BC062915	Gata3	NM_008091	Mm.313866///Mm.313866///Mm.313866
10479887	2.72036	Up	Sec61, alpha subunit 2 (S. cerevisiae)	AF145254	Sec61a2	NM_021305	Mm.21435///Mm.21435///Mm.21435///Mm.21435///Mm.21435///Mm.21435
10479749	2.1774	Up	ribonuclease P/MRP 38 subunit (human)	BC051448	Rpp38	NM_001013376	Mm.293948///Mm.293948///Mm.293948
10478572	2.38628	Up	ubiquitin-conjugating enzyme E2C		Ube2c	NM_026785	Mm.89830///Mm.89830///Mm.89830
10478048	4.70375	Up	lipopolysaccharide binding protein	BC004795	Lbp	NM_008489	Mm.218846///Mm.218846///Mm.218846
10477187	2.35453	Up	TPX2, microtubule-associated protein homolog (Xenopus laevis)	BC060619	Tpx2	NM_028109	Mm.407737///Mm.407737///Mm.407737///Mm.407737
10477042	6.25334	Up	angiopoietin 4	AF113707	Angpt4	NM_009641	Mm.189536///Mm.189536///Mm.189536
10477004	2.03414	Up	similar to alpha-tubulin isotype M-alpha-2	BC098321	LOC100044416	XR_030619
10476395	9.51007	Up	bone morphogenetic protein 2	BC100344	Bmp2	NM_007553	Mm.103205///Mm.103205///Mm.103205
10476093	2.24256	Up	nucleolar protein 5A	BC021355	Nol5a	NM_024193	Mm.29363///Mm.29363///Mm.29363///Mm.29363
10475532	2.59529	Up	sulfide quinone reductase-like (yeast)	AF174535	Sqrdl	NM_021507	Mm.28986///Mm.28986///Mm.28986///Mm.28986
10475378	2.46912	Up	cancer susceptibility candidate 4	BC064446	Casc4	NM_177054|NM_199038	Mm.292109///Mm.292109///Mm.292109///Mm.292109///Mm.292109///Mm.292109///Mm.292109
10475027	3.25851	Up	TYRO3 protein tyrosine kinase 3 | similar to Rse	BC066058	Tyro3|LOC100048488	NM_019392	Mm.2901///Mm.424496///Mm.2901///Mm.424496///Mm.2901///Mm.424496///Mm.2901///Mm.424496///Mm.2901///Mm.424496///Mm.2901///Mm.424496///Mm.2901///Mm.424496
10474984	2.13016	Up	nucleolar and spindle associated protein 1	BC100392	Nusap1	NM_133851|NM_001042652	Mm.290015///Mm.290015///Mm.290015///Mm.290015///Mm.290015
10474875	2.2169	Up	cancer susceptibility candidate 5	BC080815	Casc5	NM_029617	Mm.202518///Mm.202518///Mm.202518///Mm.202518///Mm.202518
10474769	2.4718	Up	budding uninhibited by benzimidazoles 1 homolog, beta (S. cerevisiae)	AF107296	Bub1b	NM_009773	Mm.29133///Mm.29133///Mm.29133
10474419	2.15451	Up	leucine-rich repeat-containing G protein-coupled receptor 4		Lgr4	NM_172671	Mm.277351///Mm.277351///Mm.277351
10474307	3.31167	Up	RIKEN cDNA 0610012H03 gene	BC057916	0610012H03Rik		Mm.46188///Mm.46188
10474295	4.34673	Up	Wilms tumor homolog	M55512	Wt1	NM_144783	Mm.389339///Mm.389339///Mm.389339///Mm.389339///Mm.389339///Mm.389339///Mm.389339
10474048	2.67332	Up	synaptotagmin XIII	AK129357	Syt13	NM_030725	Mm.33490///Mm.33490///Mm.33490
10473432	2.11928	Up	tankyrase 1 binding protein 1		Tnks1bp1	NM_001081260	Mm.23606///Mm.23606
10473250	2.12169	Up	similar to mitochondrial ribosomal protein L18		LOC433550	XR_032818
10473058	2.51261	Up	oxysterol binding protein-like 6	BC022908	Osbpl6	NM_145525	Mm.240435///Mm.240435///Mm.240435///Mm.240435///Mm.240435///Mm.240435///Mm.240435
10472958	2.63922	Up	homeo box D10	BC013463	Hoxd10	NM_013554	Mm.24420///Mm.24420///Mm.24420
10472953	3.70681	Up	homeo box D11		Hoxd11	NM_008273	Mm.207763///Mm.207763
10471655	3.4189	Up	gelsolin	BC060377	Gsn	NM_146120	Mm.21109///Mm.21109///Mm.21109///Mm.21109
10471525	2.18121	Up	peptidyl-tRNA hydrolase 1 homolog (S. cerevisiae)	BC098218	Ptrh1	NM_178595	Mm.268037///Mm.268037///Mm.268037///Mm.268037
10471474	5.44631	Up	adenylate kinase 1	BC054366	Ak1	NM_021515	Mm.29189///Mm.29189///Mm.29189///Mm.29189///Mm.29189
10471154	3.16527	Up	predicted gene, EG432466 | argininosuccinate synthetase 1	BC002074	EG432466|Ass1	NR_002687|NM_007494	Mm.3217///Mm.3217///Mm.3217
10471067	2.64941	Up	paired related homeobox 2		Prrx2	NM_009116	Mm.1802///Mm.1802///Mm.1802
10471062	2.16502	Up	RIKEN cDNA 2610205E22 gene	BC027220	2610205E22Rik		Mm.33167///Mm.33167
10470959	2.17777	Up	phytanoyl-CoA dioxygenase domain containing 1 | leucine rich repeat containing 8A	BC039982|BC048152	Phyhd1|Lrrc8a	NM_172267	Mm.297949///Mm.297949///Mm.297949///Mm.471628///Mm.297949///Mm.297949///Mm.297949///Mm.297949///Mm.297949
10469070	2.86475	Up	nudix (nucleoside diphosphate linked moiety X)-type motif 5	BC049595	Nudt5	NM_016918	Mm.251904///Mm.251904///Mm.251904///Mm.251904
10468869	2.48803	Up	peroxiredoxin 3	M28723	Prdx3	NM_007452	Mm.29821///Mm.29821///Mm.29821
10468489	3.29315	Up	X-prolyl aminopeptidase (aminopeptidase P) 1, soluble	BC065174	Xpnpep1	NM_133216	Mm.99776///Mm.99776///Mm.99776///Mm.99776
10468311	2.20373	Up	SH3 and PX domains 2A	AJ007012	Sh3pxd2a	NM_008018	Mm.392005///Mm.392005///Mm.392005///Mm.392005///Mm.392005
10468309	3.43126	Up	RIKEN cDNA 2310014D11 gene	AK009333	2310014D11Rik
10468287	2.0392	Up	upregulated during skeletal muscle growth 5	BC024355	Usmg5	NM_023211	Mm.29722///Mm.29722///Mm.29722
10467979	2.88971	Up	stearoyl-Coenzyme A desaturase 1	BC007474	Scd1	NM_009127	Mm.267377///Mm.267377///Mm.267377
10467744	4.11885	Up	secreted frizzled-related sequence protein 5	BC032921	Sfrp5	NM_018780	Mm.470071///Mm.470071///Mm.470071
10467730	2.02667	Up		BC057060	BC023055	NM_198108	Mm.259441///Mm.259441///Mm.259441
10466712	2.59603	Up	MAM domain containing 2	BC042773	Mamdc2	NM_174857	Mm.50841///Mm.50841///Mm.50841
10466587	3.55027	Up	RAR-related orphan receptor beta	BC024842	Rorb	NM_001043354|NM_146095	Mm.234641///Mm.234641///Mm.234641///Mm.234641///Mm.234641///Mm.234641
10466530	3.84706	Up	proprotein convertase subtilisin/kexin type 5	BC013068|L14932|D17583	Pcsk5		Mm.3401///Mm.3401///Mm.3401///Mm.3401///Mm.3401
10466439	2.38984	Up	phosphatidylethanolamine binding protein 1	BC089332	Pebp1	NM_018858	Mm.195898///Mm.338476///Mm.195898///Mm.338476///Mm.195898///Mm.338476
10465895	2.64872	Up	fatty acid desaturase 2	AF126798	Fads2	NM_019699	Mm.38901///Mm.38901///Mm.38901
10465844	3.14734	Up	asparaginase like 1	BC016106	Asrgl1	NM_025610	Mm.272847///Mm.272847///Mm.272847
10465388	2.01668	Up	ADP-ribosylation factor-like 2	BC060259	Arl2	NM_019722	Mm.21071///Mm.21071///Mm.21071
10465342	2.21824	Up	transmembrane 7 superfamily member 2	BC014769	Tm7sf2	NM_028454	Mm.458077///Mm.458077///Mm.458077///Mm.458077///Mm.458077
10464572	2.13332	Up	NADH dehydrogenase (ubiquinone) flavoprotein 1	BC014818	Ndufv1	NM_133666	Mm.29842///Mm.29842///Mm.29842
10464400	2.13476	Up	RIKEN cDNA E330013P04 gene	BC076607	E330013P04Rik		Mm.245813///Mm.245813
10464391	2.28332	Up	empty spiracles homolog 2 (Drosophila)	AY117415	Emx2	NM_010132	Mm.245394///Mm.245394///Mm.245394
10463911	2.57306	Up	adducin 3 (gamma)	BC037116	Add3	NM_013758	Mm.426080///Mm.426080///Mm.426080///Mm.426080///Mm.426080
10463476	5.42872	Up	Kazal-type serine peptidase inhibitor domain 1	BC115642	Kazald1	NM_178929	Mm.24417///Mm.24417///Mm.24417///Mm.24417
10463448	2.00798	Up	progressive external ophthalmoplegia 1 (human)	BC071195	Peo1	NM_153796	Mm.105585///Mm.105585///Mm.105585
10463355	3.10817	Up	stearoyl-Coenzyme A desaturase 2	BC040384	Scd2	NM_009128	Mm.193096///Mm.193096///Mm.193096
10462973	2.19254	Up	helicase, lymphoid specific	BC100394	Hells	NM_008234	Mm.57223///Mm.57223///Mm.57223
10462796	2.98895	Up	kinesin family member 11	BC060670	Kif11	NM_010615	Mm.42203///Mm.42203///Mm.42203
10462632	2.3205	Up	kinesin family member 20B	AY259532	Kif20b	NM_183046	Mm.278471///Mm.278471///Mm.278471///Mm.278471
10462281	3.55693	Up	very low density lipoprotein receptor	L33417	Vldlr	NM_013703	Mm.4141///Mm.4141///Mm.4141///Mm.4141
10462035	2.43297	Up	lactate dehydrogenase B	BC046755	Ldhb	NM_008492	Mm.9745///Mm.9745///Mm.9745
10461921	2.26138	Up	RIKEN cDNA 2410127L17 gene	BC043335	2410127L17Rik	NM_026120	Mm.306602///Mm.306602///Mm.306602
10461856	4.72986	Up	guanine nucleotide binding protein, alpha 14	BC027015	Gna14	NM_008137	Mm.313181///Mm.313181///Mm.313181
10461497	2.19767	Up	damage specific DNA binding protein 1	BC009661	Ddb1	NM_015735	Mm.289915///Mm.289915///Mm.289915///Mm.289915
10461439	2.75007	Up	fatty acid desaturase 1	AB072976|AK183596	Fads1	NM_146094	Mm.30158///Mm.30158///Mm.30158///Mm.30158
10461423	2.66743	Up	fatty acid desaturase 3	BC071266	Fads3	NM_021890	Mm.253875///Mm.253875///Mm.253875///Mm.253875
10461022	2.69578	Up	protein phosphatase 1, regulatory (inhibitor) subunit 14B	BC082545	Ppp1r14b	NM_008889	Mm.140///Mm.140///Mm.140
10460738	2.17663	Up	cell division cycle associated 5	BC052904	Cdca5	NM_026410	Mm.23526///Mm.23526///Mm.23526///Mm.23526
10460666	2.0817	Up	latent transforming growth factor beta binding protein 3	AK131126	Ltbp3	NM_008520	Mm.182396///Mm.182396///Mm.182396///Mm.182396
10460603	4.04259	Up	epidermal growth factor-containing fibulin-like extracellular matrix protein 2	BC012269	Efemp2	NM_021474	Mm.276367///Mm.276367///Mm.276367
10460541	2.0971	Up	CD248 antigen, endosialin	BC046318	Cd248	NM_054042	Mm.29597///Mm.29597///Mm.29597
10460400	4.06009	Up	pyruvate carboxylase	L09192	Pcx	NM_008797	Mm.1845///Mm.1845///Mm.1845///Mm.1845
10460057	2.89673	Up	teashirt zinc finger family member 1	BC058264|AY242353	Tshz1	NM_001081300	Mm.102136///Mm.102136///Mm.102136///Mm.102136
10459421	2.48721	Up	ATPase, class I, type 8B, member 1	BC117946	Atp8b1	NM_001001488	Mm.270043///Mm.270043///Mm.270043
10459405	2.56539	Up	asparaginyl-tRNA synthetase	BC052849	Nars	NM_027350	Mm.29192///Mm.29192///Mm.29192
10459389	2.9408	Up	S-adenosylmethionine decarboxylase 1 | S-adenosylmethionine decarboxylase, pseudogene 3	CT010192	Amd1|Amd-ps3	XR_032961	Mm.253533///Mm.253533///Mm.253533///Mm.253533
10459193	2.18196	Up	peroxisome proliferative activated receptor, gamma, coactivator 1 beta	AF453324	Ppargc1b	NM_133249	Mm.436775///Mm.436775///Mm.436775///Mm.436775
10458999	2.4733	Up	fibrillin 2		Fbn2	NM_010181	Mm.20271///Mm.20271///Mm.20271
10458960	3.09166	Up	aldehyde dehydrogenase family 7, member A1	BC012407	Aldh7a1	NM_138600	Mm.30250///Mm.30250///Mm.30250///Mm.30250
10458894	2.75982	Up	lysyl oxidase	M65142	Lox	NM_010728	Mm.172///Mm.172///Mm.172
10458641	2.0602	Up	G protein-coupled receptor 151	BC120520	Gpr151	NM_181543	Mm.186779///Mm.186779///Mm.186779
10458226	2.72972	Up	heat shock protein 9	D17556	Hspa9	NM_010481	Mm.209419///Mm.209419///Mm.209419
10458052	2.06502	Up	erythrocyte protein band 4.1-like 4a	BC013557	Epb4.1l4a	NM_013512	Mm.3465///Mm.3465///Mm.3465
10457054	2.7735	Up	zinc binding alcohol dehydrogenase, domain containing 2	BC025897	Zadh2	NM_146090	Mm.147052///Mm.147052///Mm.147052
10456699	2.37895	Up	acetyl-Coenzyme A acyltransferase 2 (mitochondrial 3-oxoacyl-Coenzyme A thiolase)	BC028901	Acaa2	NM_177470	Mm.245724///Mm.245724///Mm.245724
10456414	2.13666	Up	proteasome (prosome, macropain) assembly chaperone 2	AB031387	Psmg2	NM_134138	Mm.150701///Mm.150701///Mm.150701
10455912	2.32202	Up	isochorismatase domain containing 1	AY035213	Isoc1	NM_025478	Mm.182574///Mm.182574///Mm.182574
10454881	3.38445	Up	RIKEN cDNA 0610010O12 gene	BC028765	0610010O12Rik	NM_001081365	Mm.272527///Mm.272527///Mm.272527///Mm.272527
10454709	2.22959	Up	kinesin family member 20A	BC060608	Kif20a	NM_009004	Mm.258846///Mm.258846///Mm.258846
10454254	4.53249	Up	dystrobrevin alpha	BC040364	Dtna	NM_207650|NM_010087	Mm.94371///Mm.94371///Mm.94371///Mm.94371///Mm.94371///Mm.94371///Mm.94371///Mm.94371///Mm.94371
10453747	2.02157	Up	collectin sub-family member 12	AB038519	Colec12	NM_130449	Mm.218571///Mm.218571///Mm.218571
10453715	2.07447	Up	RAB18, member RAS oncogene family	BC089012	Rab18	NM_019499	Mm.132802///Mm.132802///Mm.132802///Mm.132802///Mm.132802
10453629	2.02396	Up	RIKEN cDNA 9430020K01 gene | hypothetical gene supported by AK043736		9430020K01Rik|LOC433157	NM_001081963	Mm.33179///Mm.33179
10453512	2.85907	Up	karyopherin (importin) alpha 2 | similar to nuclear pore-targeting complex component of 58 kDa	D55720	Kpna2|LOC100039592|LOC100043906	NM_010655|XR_031201|XR_032285|XR_034361|XR_034991	Mm.12508///Mm.391577///Mm.423000///Mm.12508///Mm.391577///Mm.423000///Mm.12508///Mm.391577///Mm.423000///Mm.12508///Mm.391577///Mm.423000///Mm.12508///Mm.391577///Mm.423000///Mm.12508///Mm.391577///Mm.423000///Mm.12508///Mm.391577///Mm.423000///Mm.12508///Mm.391577///Mm.423000///Mm.12508///Mm.391577///Mm.423000///Mm.12508///Mm.391577///Mm.423000///Mm.12508///Mm.391577///Mm.423000///Mm.12508///Mm.…
10453373	2.5013	Up	prolyl endopeptidase-like	BC004612	Prepl	NM_145984	Mm.259035///Mm.259035///Mm.259035///Mm.259035
10452508	2.13314	Up	twisted gastrulation homolog 1 (Drosophila)	AJ297390	Twsg1	NM_023053	Mm.10153///Mm.10153///Mm.10153
10452419	2.5407	Up	ephrin A5	BC040218	Efna5	NM_207654|NM_010109	Mm.471638///Mm.471638///Mm.471638///Mm.471638///Mm.471638
10452118	2.06324	Up	lon peptidase 1, mitochondrial	BC057365	Lonp1	NM_028782	Mm.329136///Mm.329136///Mm.329136///Mm.329136
10451805	2.87433	Up	shugoshin-like 1 (S. pombe)	BC089014	Sgol1	NM_028232	Mm.153202///Mm.153202///Mm.153202
10451248	2.08731	Up	tight junction associated protein 1	BC023316	Tjap1	NM_028751	Mm.284594///Mm.284594///Mm.284594
10450982	4.85126	Up	G protein-coupled receptor 115	BC089564	Gpr115		Mm.66217///Mm.66217
10450579	2.44111	Up	discoidin domain receptor family, member 1	L57509	Ddr1	NM_007584|NM_172962	Mm.5021///Mm.5021///Mm.5021///Mm.5021///Mm.5021
10450519	2.21242	Up	transcription factor 19	BC004617	Tcf19	NM_025674	Mm.11434///Mm.11434///Mm.11434
10450344	2.60773	Up	complement component 2 (within H-2S)	M57891	C2	NM_013484	Mm.283217///Mm.283217///Mm.283217
10449452	2.97018	Up	FK506 binding protein 5	BC015260	Fkbp5	NM_010220	Mm.276405///Mm.276405///Mm.276405///Mm.276405///Mm.276405
10448506	2.21416	Up	cyclin F	U20636	Ccnf	NM_007634	Mm.77695///Mm.77695///Mm.77695///Mm.77695
10448307	2.63723	Up	tumor necrosis factor receptor superfamily, member 12a	BC025860	Tnfrsf12a	NM_013749	Mm.28518///Mm.28518///Mm.28518
10448117	2.1661	Up	hyaluronan synthase1	D82964	Has1	NM_008215	Mm.255701///Mm.255701///Mm.255701
10447904	3.61578	Up	unc-93 homolog A (C. elegans)	BC128471	Unc93a
10447891	2.11443	Up	acetyl-Coenzyme A acetyltransferase 2	BC012496	Acat2	NM_009338	Mm.439711///Mm.439711///Mm.439711
10447880	2.00413	Up	mitochondrial ribosomal protein L18	BC011425	Mrpl18	NM_026310	Mm.290166///Mm.290166///Mm.290166
10447634	2.85586	Up	unc-93 homolog A (C. elegans)	BC128471	Unc93a	NM_199252	Mm.390935///Mm.390935///Mm.390935
10447510	2.77751	Up
10447461	2.70599	Up	stonin 1		Ston1	NM_029858	Mm.35296///Mm.35296///Mm.35296
10447354	2.26429	Up	thioredoxin domain containing 14	BC110994	Txndc14	NM_025868	Mm.371621///Mm.371621
10447130	4.7486	Up	expressed sequence AW548124 | similar to Expressed sequence AW548124	BC086639	AW548124|LOC100048505		Mm.311974///Mm.311974
10446907	2.34144	Up	tetratricopeptide repeat domain 27	BC021912	Ttc27	NM_152817	Mm.209503///Mm.209503///Mm.209503
10446553	2.31949	Up	erythrocyte protein band 4.1-like 3	AF152247	Epb4.1l3	NM_013813	Mm.131135///Mm.131135///Mm.131135///Mm.131135///Mm.131135///Mm.131135///Mm.131135///Mm.131135
10446549	2.81541	Up			EG622645	XM_001480132
10446207	2.42383	Up	caseinolytic peptidase, ATP-dependent, proteolytic subunit homolog (E. coli)	BC001998|AK177819	Clpp	NM_017393	Mm.287892///Mm.287892///Mm.287892///Mm.287892
10444927	2.23332	Up	nurim (nuclear envelope membrane protein)	BC021750	Nrm	NM_134122	Mm.390992///Mm.390992///Mm.390992
10443836	2.32911	Up	ribosomal RNA processing 1 homolog B (S. cerevisiae)	BC016569	Rrp1b	NM_028244	Mm.102761///Mm.102761///Mm.102761
10443830	2.01775	Up	crystallin, alpha A	BC085170	Cryaa	NM_013501	Mm.1228///Mm.1228///Mm.1228///Mm.1228
10442027	2.8972	Up	predicted gene, ENSMUSG00000054339 | similar to Lysosomal-associated protein transmembrane 4B	EU561010	ENSMUSG00000054339|LOC626785	XR_031767
10441902	3.98939	Up	SPARC related modular calcium binding 2	BC019527	Smoc2	NM_022315	Mm.30162///Mm.30162///Mm.30162///Mm.30162
10440929	2.03286	Up	phosphoribosylglycinamide formyltransferase	BC070465	Gart	NM_010256	Mm.4505///Mm.4505///Mm.4505
10440800	3.79431	Up	RIKEN cDNA 4921511H13 gene	AK220219	4921511H13Rik		Mm.328688///Mm.328688
10440344	2.0504	Up	roundabout homolog 2 (Drosophila)	DQ533876	Robo2	NM_175549	Mm.171736///Mm.171736///Mm.171736///Mm.171736///Mm.171736///Mm.171736
10439955	2.44943	Up	gene model 1752, (NCBI)	AK157499	Gm1752	XM_925022	Mm.310635///Mm.310635///Mm.310635
10439881	2.60605	Up	RIKEN cDNA 5330426P16 gene		5330426P16Rik
10439762	2.1737	Up	S-adenosylhomocysteine hydrolase	BC108367	Ahcy		Mm.330692///Mm.371964///Mm.330692///Mm.371964///Mm.330692///Mm.371964///Mm.330692///Mm.371964
10439612	2.17954	Up	biregional cell adhesion molecule-related/down-regulated by oncogenes (Cdon) binding protein	BC062892	Boc	NM_172506	Mm.41561///Mm.41561///Mm.41561///Mm.41561
10439276	2.57885	Up	RIKEN cDNA 2310056P07 gene	BC010826	2310056P07Rik	NM_027342	Mm.212991///Mm.212991///Mm.212991
10439130	2.54424	Up	uridine monophosphate synthetase	BC095981	Umps	NM_009471	Mm.13145///Mm.13145///Mm.13145
10438769	2.90149	Up	claudin 1	BC002003	Cldn1	NM_016674	Mm.289441///Mm.289441///Mm.289441
10438708	3.16884	Up	mannan-binding lectin serine peptidase 1	D16492	Masp1	NM_008555	Mm.1213///Mm.1213///Mm.1213///Mm.1213
10438690	2.29345	Up	replication factor C (activator 1) 4	BC003335	Rfc4	NM_145480	Mm.386835///Mm.386835///Mm.386835///Mm.386835
10438530	3.75004	Up	chloride channel 2	AF139724	Clcn2	NM_009900	Mm.177761///Mm.177761///Mm.177761
10438378	2.13533	Up	cell division cycle 45 homolog (S. cerevisiae)-like	AF081536	Cdc45l	NM_009862	Mm.1248///Mm.1248///Mm.1248///Mm.1248///Mm.1248
10437945	2.12133	Up	minichromosome maintenance deficient 4 homolog (S. cerevisiae)	D26089	Mcm4	NM_008565	Mm.1500///Mm.472867///Mm.1500///Mm.472867///Mm.1500///Mm.472867
10437748	2.03531	Up	G1 to S phase transition 1	BC028325	Gspt1	NM_146066	Mm.325827///Mm.391791///Mm.325827///Mm.391791///Mm.325827///Mm.391791
10437174	3.1487	Up	tryptophan rich basic protein	BC031769	Wrb	NM_207301	Mm.255063///Mm.255063///Mm.255063
10436809	4.81846	Up	RIKEN cDNA 4931408A02 gene	AF358257|BC132305|BC100350	4931408A02Rik		Mm.253077///Mm.253077///Mm.253077///Mm.253077///Mm.253077///Mm.253077
10436487	3.43414	Up	vestigial like 3 (Drosophila)	AK007165	Vgll3	XM_283372	Mm.25670///Mm.25670///Mm.25670
10436456	2.05523	Up	protein S (alpha)	Z25469	Pros1	NM_011173	Mm.127156///Mm.127156///Mm.127156
10436372	3.88543	Up	discoidin, CUB and LCCL domain containing 2	BC066097	Dcbld2	NM_028523	Mm.373589///Mm.373589///Mm.373589
10436106	2.38625	Up	RIKEN cDNA C330027C09 gene		C330027C09Rik	NM_172616	Mm.24491///Mm.24491
10435733	2.98792	Up	immunoglobulin superfamily, member 11	BC057555	Igsf11	NM_170599	Mm.245564///Mm.245564///Mm.245564
10435641	4.43747	Up	follistatin-like 1	M91380	Fstl1	NM_008047	Mm.182434///Mm.182434///Mm.182434
10435075	3.04525	Up	transferrin receptor	BC054522	Tfrc	NM_011638	Mm.28683///Mm.28683///Mm.28683
10434668	2.31719	Up	transmembrane protein 97	BC093511	Tmem97	NM_133706	Mm.29431///Mm.29431///Mm.29431
10434528	4.6579	Up	chordin	AF069501	Chrd	NM_009893	Mm.20457///Mm.20457///Mm.20457///Mm.20457
10433776	2.06167	Up	snail homolog 2 (Drosophila)	BC062164	Snai2	NM_011415	Mm.4272///Mm.4272///Mm.4272
10433445	5.96707	Up	4-aminobutyrate aminotransferase	BC058079	Abat	NM_172961	Mm.259315///Mm.259315///Mm.259315///Mm.259315///Mm.259315
10433274	3.18698	Up	vasorin	BC050274	Vasn	NM_139307	Mm.248337///Mm.248337///Mm.248337///Mm.248337
10433088	2.50831	Up	chromobox homolog 5 (Drosophila HP1a)	BC004707	Cbx5	NM_007626|NM_001110216|NM_001076789	Mm.262059///Mm.262059///Mm.262059///Mm.262059///Mm.262059
10432711	5.47452	Up	keratin 84	AY028607	Krt84	NM_008474	Mm.25292///Mm.25292///Mm.25292
10432540	2.31511	Up	LIM domain and actin binding 1	AF307844	Lima1	NM_001113545|NM_023063	Mm.33207///Mm.33207///Mm.33207///Mm.33207///Mm.33207
10431051	3.64055	Up	signal peptide, CUB domain, EGF-like 1	BC066066	Scube1	NM_022723	Mm.40393///Mm.40393///Mm.40393///Mm.40393///Mm.40393
10431035	2.31065	Up	tubulin tyrosine ligase-like family, member 12	BC055368	Ttll12	NM_183017	Mm.46778///Mm.46778///Mm.46778
10430968	3.98187	Up	alpha 1,4-galactosyltransferase	AY371179	A4galt	NM_001004150	Mm.323805///Mm.323805///Mm.323805
10429754	2.0096	Up	nuclear receptor binding protein 2	BC012437	Nrbp2	NM_144847	Mm.101946///Mm.101946///Mm.101946
10429607	2.07703	Up	DNA topoisomerase 1, mitochondrial	AF362952	Top1mt	NM_028404	Mm.182401///Mm.182401///Mm.182401
10429538	3.28114	Up	cytochrome P450, family 11, subfamily b, polypeptide 1		Cyp11b1	NM_001033229	Mm.322606///Mm.322606
10429387	2.20221	Up	protein tyrosine phosphatase-like (proline instead of catalytic arginine), member b	BC131899	Ptplb		Mm.27286///Mm.27286
10427125	4.39394	Up	insulin-like growth factor binding protein 6	BC012723	Igfbp6	NM_008344	Mm.358609///Mm.358609///Mm.358609
10425945	2.75828	Up	fibulin 1	X70854	Fbln1	NM_010180	Mm.297992///Mm.297992///Mm.297992///Mm.297992
10425623	2.16488	Up	cold shock domain containing C2, RNA binding	BC016109	Csdc2	NM_145473	Mm.22524///Mm.22524///Mm.22524
10425611	2.54871	Up	aconitase 2, mitochondrial	BC094462	Aco2	NM_080633	Mm.154581///Mm.154581///Mm.154581
10425287	2.20762	Up	KDEL (Lys-Asp-Glu-Leu) endoplasmic reticulum protein retention receptor 3	BC011472	Kdelr3	NM_134090	Mm.298199///Mm.298199///Mm.298199
10425257	2.3711	Up	polymerase (RNA) II (DNA directed) polypeptide F	BC024419	Polr2f	NM_027231	Mm.279861///Mm.279861///Mm.279861
10424825	2.56791	Up	cytochrome c-1	BC005620	Cyc1	NM_025567	Mm.29196///Mm.29196///Mm.29196
10424559	3.40154	Up	KH domain containing, RNA binding, signal transduction associated 3	AF079763	Khdrbs3	NM_010158	Mm.17964///Mm.17964///Mm.17964
10424400	2.18141	Up	myelocytomatosis oncogene	BC006728	Myc	NM_010849	Mm.2444///Mm.2444///Mm.2444
10424349	2.11914	Up	squalene epoxidase	BC056361	Sqle	NM_009270	Mm.296169///Mm.296169///Mm.296169///Mm.296169
10424340	2.02742	Up	NADH dehydrogenase (ubiquinone) 1 beta subcomplex, 9	BC031539	Ndufb9	NM_023172	Mm.322294///Mm.322294///Mm.322294
10424140	6.27402	Up	collagen, type XIV, alpha 1	AY221110	Col14a1	NM_181277	Mm.297859///Mm.297859///Mm.297859///Mm.297859///Mm.297859
10423599	6.12548	Up	matrilin 2	U69262	Matn2	NM_016762	Mm.396856///Mm.396856///Mm.396856
10423593	2.5922	Up	lysosomal-associated protein transmembrane 4B	EU561010	Laptm4b	NM_033521	Mm.197518///Mm.197518///Mm.197518
10423548	5.13459	Up	syndecan 2	U00674	Sdc2	NM_008304	Mm.234266///Mm.234266///Mm.234266
10423520	3.12262	Up	sema domain, seven thrombospondin repeats (type 1 and type 1-like), transmembrane domain (TM) and short cytoplasmic domain, (semaphorin) 5A	BC065137	Sema5a	NM_009154	Mm.260374///Mm.260374///Mm.260374///Mm.260374
10423498	2.2299	Up	death-associated protein	BC010828	Dap	NM_146057	Mm.222867///Mm.222867///Mm.222867
10422608	2.04138	Up	3-oxoacid CoA transferase 1	BC003422	Oxct1	NM_024188	Mm.13445///Mm.13445///Mm.13445///Mm.13445
10422321	2.08081	Up	DAZ interacting protein 1	BC098211	Dzip1	NM_025943	Mm.87456///Mm.87456///Mm.87456///Mm.87456
10421981	2.14589	Up	DIS3 mitotic control homolog (S. cerevisiae)	BC027357	Dis3	NM_028315	Mm.163339///Mm.163339///Mm.163339///Mm.163339
10421917	2.2751	Up	poly A binding protein, cytoplasmic 4	BC010345	Pabpc4	NM_148917|NM_130881	Mm.277091///Mm.277091///Mm.277091///Mm.277091///Mm.277091///Mm.277091///Mm.277091///Mm.277091///Mm.277091
10421877	2.76614	Up	diaphanous homolog 3 (Drosophila)	BC085191	Diap3	NM_019670	Mm.440585///Mm.440585///Mm.440585
10421361	2.88743	Up	bone morphogenetic protein 1	BC066062	Bmp1	NM_009755	Mm.27757///Mm.27757///Mm.27757///Mm.27757///Mm.27757///Mm.27757
10421029	2.25355	Up	cell division cycle associated 2	BC075682	Cdca2	NM_175384|NM_001110162	Mm.33831///Mm.33831///Mm.33831///Mm.33831///Mm.33831
10420631	3.25419	Up	emopamil binding protein-like	BC027422	Ebpl	NM_026598	Mm.22758///Mm.22758///Mm.22758
10420426	2.8588	Up	RIKEN cDNA F630043A04 gene	BC117501	F630043A04Rik	NM_198605	Mm.30173///Mm.30173///Mm.30173
10420035	2.42066	Up	importin 4	BC085150	Ipo4	NM_024267	Mm.27546///Mm.27546///Mm.27546
10419854	3.60926	Up	solute carrier family 7 (cationic amino acid transporter, y+ system), member 8	BC059004	Slc7a8	NM_016972	Mm.276831///Mm.276831///Mm.276831
10419323	2.57402	Up	discs, large homolog 7 (Drosophila)	BC058087	Dlg7	NM_144553	Mm.240543///Mm.240543///Mm.240543///Mm.240543
10419082	2.53291	Up	RIKEN cDNA 5730469M10 gene	BC056635	5730469M10Rik		Mm.27227///Mm.27227
10419034	2.82157	Up	RIKEN cDNA 2610528A11 gene	AK012157	2610528A11Rik	XM_987802	Mm.271619///Mm.271619
10418927	2.97907	Up	bone morphogenetic protein receptor, type 1A	BC042611	Bmpr1a	NM_009758	Mm.237825///Mm.237825///Mm.237825
10418480	2.21144	Up	guanine nucleotide binding protein-like 3 (nucleolar)	BC037996	Gnl3	NM_153547	Mm.88512///Mm.88512///Mm.88512
10418341	2.35713	Up	interleukin 17 receptor B	AF208109	Il17rb	NM_019583	Mm.269363///Mm.269363///Mm.269363
10418096	3.06173	Up	discs, large homolog 5 (Drosophila)	BC021314|BC067046	Dlg5		Mm.68971///Mm.68971///Mm.68971///Mm.68971///Mm.68971
10417759	2.26889	Up	ubiquitin-conjugating enzyme E2E 2 (UBC4/5 homolog, yeast)	BC016265	Ube2e2	NM_144839	Mm.23551///Mm.23551///Mm.23551
10417713	3.00601	Up	retinoic acid receptor, beta	BC076597	Rarb	NM_011243	Mm.259318///Mm.259318///Mm.259318///Mm.259318///Mm.259318
10417538	2.34845	Up	pyruvate dehydrogenase (lipoamide) beta	BC094468	Pdhb	NM_024221	Mm.301527///Mm.301527///Mm.301527
10417212	2.80501	Up	integrin, beta-like 1	BC020152	Itgbl1	NM_145467	Mm.383176///Mm.383176///Mm.383176///Mm.383176///Mm.383176
10417167	3.38298	Up	citrate lyase beta like	BC023398	Clybl	NM_029556	Mm.34608///Mm.34608///Mm.34608///Mm.34608
10416974	2.82369	Up	glypican 6 | similar to Glypican 6	AF105268	Gpc6|LOC100045283	NM_001079844|NM_011821	Mm.440025///Mm.440025///Mm.440025///Mm.440025///Mm.440025
10416777	3.1625	Up	Kruppel-like factor 5	AB025099	Klf5	NM_009769	Mm.30262///Mm.30262///Mm.30262
10416379	2.12559	Up	succinate-Coenzyme A ligase, ADP-forming, beta subunit	BC057605	Sucla2	NM_011506	Mm.38951///Mm.38951///Mm.38951
10416155	2.21173	Up	potassium channel tetramerisation domain containing 9	BC011302	Kctd9	NM_001111028|NM_134073	Mm.6720///Mm.6720///Mm.6720///Mm.6720///Mm.6720
10416037	2.73352	Up	PDZ binding kinase	BC020099	Pbk	NM_023209	Mm.24337///Mm.24337///Mm.24337
10414522	2.14439	Up	apurinic/apyrimidinic endonuclease 1	BC052401	Apex1	NM_009687	Mm.203///Mm.203///Mm.203
10414333	2.28514	Up	sterile alpha motif domain containing 4	DQ278487	Samd4	NM_001037221|NM_028966	Mm.269139///Mm.269139///Mm.269139///Mm.269139///Mm.269139///Mm.269139///Mm.269139///Mm.269139
10414269	2.00784	Up			BC061237	XR_031487
10413874	2.78221	Up	oxoglutarate dehydrogenase-like		Ogdhl	NM_001081130	Mm.318302///Mm.318302
10413826	2.50126	Up	oxidoreductase NAD-binding domain containing 1	BC019806	Oxnad1	NM_145460	Mm.202257///Mm.202257///Mm.202257
10413710	2.09451	Up	5'-nucleotidase domain containing 2	BC011230	Nt5dc2	NM_027289	Mm.261681///Mm.261681///Mm.261681
10413482	6.78666	Up	wingless-related MMTV integration site 5A	BC018425	Wnt5a	NM_009524	Mm.287544///Mm.287544///Mm.287544///Mm.287544///Mm.287544
10413222	2.33353	Up	peptidylprolyl isomerase F (cyclophilin F)	BC004041	Ppif	NM_134084	Mm.41656///Mm.41656///Mm.41656
10413086	3.09944	Up	adenosine kinase	BC009659	Adk	NM_134079	Mm.188734///Mm.188734///Mm.188734
10412481	2.50066	Up	RIKEN cDNA 2410127L17 gene	BC092281	2410127L17Rik	NM_026120	Mm.306602///Mm.306602///Mm.306602
10412260	3.68752	Up	follistatin	BC145945	Fst	NM_008046	Mm.4913///Mm.4913///Mm.4913
10412207	2.24581	Up	RIKEN cDNA 2310016C16 gene	BC019664	2310016C16Rik		Mm.12715///Mm.12715
10412036	2.33779	Up	apolipoprotein O, pseudogene | apolipoprotein O	BC107208	Apoo-ps	NR_004438|NM_026673	Mm.379156///Mm.379156///Mm.379156
10411739	3.96766	Up	cyclin B1	BC011478	Ccnb1	NM_172301	Mm.260114///Mm.380027///Mm.260114///Mm.380027///Mm.260114///Mm.380027///Mm.260114///Mm.380027///Mm.260114///Mm.380027
10411728	2.20141	Up	centromere protein H	AB017634	Cenph	NM_021886	Mm.273502///Mm.273502///Mm.273502
10411274	2.09524	Up	synaptic vesicle glycoprotein 2c	BC132111|U24700|AK173092	Sv2c		Mm.441155///Mm.441155///Mm.441155
10410756	2.20507	Up	ankyrin repeat domain 32 | BRCT domain containing 1	BC100362	Ankrd32|Brctd1	NM_134071	Mm.209730///Mm.469195///Mm.469195///Mm.469195
10410695	2.38667	Up	Rho-related BTB domain containing 3	AK129234	Rhobtb3	NM_028493	Mm.276200///Mm.276200///Mm.276200///Mm.276200
10410560	2.68714	Up	thyroid hormone receptor interactor 13	BC126946	Trip13	NM_027182	Mm.275095///Mm.275095///Mm.275095
10410408	2.86416	Up	adenylate cyclase 2	BC037107	Adcy2	NM_153534	Mm.390617///Mm.390617///Mm.390617
10410099	3.62832	Up	CDC14 cell division cycle 14 homolog B (S. cerevisiae)	BC057357	Cdc14b	NM_172587|NM_001122989	Mm.25335///Mm.25335///Mm.25335///Mm.25335///Mm.25335///Mm.25335
10409857	2.58138	Up	RIKEN cDNA 4930486L24 gene	AY146988	4930486L24Rik	NM_178098	Mm.19839///Mm.19839///Mm.19839
10409833	2.87351	Up	growth arrest specific 1	BC058628	Gas1	NM_008086	Mm.22701///Mm.22701///Mm.22701///Mm.22701
10409579	3.64528	Up	chemokine (C-X-C motif) ligand 14	AF192557	Cxcl14	NM_019568	Mm.30211///Mm.30211///Mm.30211
10409345	2.06201	Up	clathrin, light polypeptide (Lcb)	BC070404	Cltb	NM_028870	Mm.290026///Mm.290026///Mm.290026
10408741	2.04731	Up	thioredoxin domain containing 5	AY243534	Txndc5	NM_145367	Mm.28622///Mm.28622///Mm.28622
10408246	2.6765	Up	histone cluster 1, H3a | histone cluster 2, H3b | histone cluster 2, H3c1 | histone cluster 1, H3i | histone cluster 1, H3b | histone cluster 1, H3d | histone cluster 1, H3e | histone cluster 1, H3h | histone cluster 1, H3g | histone cluster 1, H3f | histone cluster 1, H3c | histone cluster 2, H3c2	BC115816|BC116383	Hist1h3a|Hist2h3b|Hist2h3c1|Hist1h3i|Hist1h3b|Hist1h3d|Hist1h3e|Hist1h3h|Hist1h3g|Hist1h3f|Hist1h3c|Hist2h3c2	NM_013550|NM_178215|NM_019469|NM_178207|NM_178203|NM_178204|NM_178205	Mm.221301///Mm.383293///Mm.422680///Mm.221301///Mm.390558///Mm.342457///Mm.347699///Mm.261658///Mm.221301///Mm.261657///Mm.377874///Mm.390558///Mm.221301///Mm.261657///Mm.377874///Mm.390558///Mm.221389///Mm.261658///Mm.262517///Mm.342457///Mm.347699///Mm.358797///Mm.383293///Mm.422680///Mm.390558
10408239	2.87188	Up	histone cluster 2, H3b | histone cluster 2, H3c1 | histone cluster 1, H3c | histone cluster 1, H3b | histone cluster 1, H3d | histone cluster 1, H3e | histone cluster 1, H3f | histone cluster 2, H3c2 | histone cluster 1, H3h | histone cluster 1, H3i | histone cluster 1, H3a | histone cluster 1, H3g	BC120800|BC116383	Hist2h3b|Hist2h3c1|Hist1h3c|Hist1h3b|Hist1h3d|Hist1h3e|Hist1h3f|Hist2h3c2|Hist1h3h|Hist1h3i|Hist1h3a|Hist1h3g	NM_178215|NM_019469|NM_175653|NM_178203|NM_178204|NM_178205	Mm.383293///Mm.422680///Mm.262517///Mm.342457///Mm.347699///Mm.261658///Mm.221389///Mm.261658///Mm.262517///Mm.342457///Mm.347699///Mm.358797///Mm.383293///Mm.422680///Mm.221301///Mm.261657///Mm.377874///Mm.390558///Mm.221389///Mm.261658///Mm.262517///Mm.342457///Mm.347699///Mm.358797///Mm.383293///Mm.422680///Mm.262517///Mm.390558
10408210	2.04332	Up	histone cluster 1, H2bf | histone cluster 1, H2bl | histone cluster 1, H2bk | histone cluster 1, H2bh | histone cluster 1, H2bn | histone cluster 1, H2bm | histone cluster 1, H2bj | histone cluster 1, H2bb | histone cluster 1, H2be | histone cluster 1, H2bg | H2b histone family, member A | H2b histone family member | histone cluster 1, H2bc | similar to Hist1h2bj protein		Hist1h2bf|Hist1h2bl|Hist1h2bk|Hist1h2bh|Hist1h2bn|Hist1h2bm|Hist1h2bj|Hist1h2bb|Hist1h2be|Hist1h2bg|RP23-38E20.1|LOC665622|Hist1h2bc|LOC100046213	NM_178195|NM_178199|NM_175665|NM_178197|NM_178201|NM_178200|NM_178198	Mm.261672///Mm.377880///Mm.358955///Mm.352273///Mm.261677///Mm.277425///Mm.257055///Mm.352273///Mm.261673///Mm.261676///Mm.371766///Mm.390567///Mm.440391///Mm.277425///Mm.358955///Mm.277425///Mm.257055///Mm.261672///Mm.261677///Mm.377880///Mm.257055///Mm.261672///Mm.261677///Mm.377880///Mm.257055///Mm.261672///Mm.261677///Mm.377880
10408202	2.71145	Up	histone cluster 2, H3b | histone cluster 1, H3e | histone cluster 1, H3b | histone cluster 1, H3d | histone cluster 2, H3c1 | histone cluster 1, H3f | histone cluster 1, H3c | histone cluster 2, H3c2 | histone cluster 1, H3h | histone cluster 1, H3i | histone cluster 1, H3a | histone cluster 1, H3g	BC116383	Hist2h3b|Hist1h3e|Hist1h3b|Hist1h3d|Hist2h3c1|Hist1h3f|Hist1h3c|Hist2h3c2|Hist1h3h|Hist1h3i|Hist1h3a|Hist1h3g	NM_178215|NM_178205|NM_178203|NM_178204|NM_019469	Mm.261658///Mm.342457///Mm.347699///Mm.221389///Mm.261658///Mm.262517///Mm.342457///Mm.347699///Mm.358797///Mm.383293///Mm.422680///Mm.221301///Mm.261657///Mm.377874///Mm.390558///Mm.221389///Mm.261658///Mm.262517///Mm.342457///Mm.347699///Mm.358797///Mm.383293///Mm.422680///Mm.390558
10408200	2.0857	Up	histone cluster 1, H4f | similar to histone H4 | histone cluster 1, H4c | histone cluster 1, H4d | histone cluster 1, H4i | histone cluster 1, H4j | histone cluster 1, H4k | histone cluster 1, H4m | histone cluster 4, H4 | histone cluster 1, H4a | histone cluster 1, H4b | histone cluster 1, H4h | histone cluster 2, H4		Hist1h4f|LOC100041230|Hist1h4c|Hist1h4d|Hist1h4i|Hist1h4j|Hist1h4k|Hist1h4m|Hist4h4|Hist1h4a|Hist1h4b|Hist1h4h|Hist2h4	NM_175655	Mm.377875///Mm.442307///Mm.14775///Mm.144300///Mm.158272///Mm.227295///Mm.228709///Mm.246720///Mm.255646///Mm.260530///Mm.261642///Mm.261662///Mm.261664///Mm.377875///Mm.442307
10408083	2.73336	Up	histone cluster 2, H3b | histone cluster 2, H3c1 | histone cluster 1, H3i | histone cluster 1, H3b | histone cluster 1, H3d | histone cluster 1, H3e | histone cluster 1, H3h | histone cluster 1, H3a | histone cluster 1, H3g | histone cluster 1, H3f | histone cluster 1, H3c | histone cluster 2, H3c2	BC116383	Hist2h3b|Hist2h3c1|Hist1h3i|Hist1h3b|Hist1h3d|Hist1h3e|Hist1h3h|Hist1h3a|Hist1h3g|Hist1h3f|Hist1h3c|Hist2h3c2	NM_178215|NM_019469|NM_178207|NM_178203|NM_178204|NM_178205	Mm.383293///Mm.422680///Mm.390558///Mm.342457///Mm.347699///Mm.261658///Mm.221301///Mm.261657///Mm.377874///Mm.390558///Mm.221389///Mm.261658///Mm.262517///Mm.342457///Mm.347699///Mm.358797///Mm.383293///Mm.422680///Mm.390558
10408081	2.69216	Up	histone cluster 1, H1b		Hist1h1b	NM_020034	Mm.221314///Mm.221314
10408070	2.11484	Up	histone cluster 1, H2bl | histone cluster 1, H2bk | histone cluster 1, H2bm | histone cluster 1, H2bj | histone cluster 1, H2bn | histone cluster 1, H2bf | histone cluster 1, H2bh | histone cluster 1, H2bb | histone cluster 1, H2be | histone cluster 1, H2bg | H2b histone family, member A | H2b histone family member | histone cluster 1, H2bc | similar to Hist1h2bj protein		Hist1h2bl|Hist1h2bk|Hist1h2bm|Hist1h2bj|Hist1h2bn|Hist1h2bf|Hist1h2bh|Hist1h2bb|Hist1h2be|Hist1h2bg|RP23-38E20.1|LOC665622|Hist1h2bc|LOC100046213	NM_178199|NM_175665|NM_178200|NM_178198|NM_178201|NM_178195|NM_178197	Mm.377880///Mm.358955///Mm.277425///Mm.257055///Mm.261677///Mm.261672///Mm.352273///Mm.277425///Mm.261673///Mm.261676///Mm.371766///Mm.390567///Mm.440391///Mm.352273///Mm.358955///Mm.277425///Mm.257055///Mm.261672///Mm.261677///Mm.377880///Mm.257055///Mm.261672///Mm.261677///Mm.377880///Mm.257055///Mm.261672///Mm.261677///Mm.377880
10407955	2.96396	Up	ependymin related protein 1 (zebrafish)	BC014708	Epdr1	NM_134065	Mm.275054///Mm.275054///Mm.275054
10407350	2.82537	Up	fibroblast growth factor 10	BC048229	Fgf10	NM_008002	Mm.317323///Mm.317323///Mm.317323
10406852	2.92575	Up	calponin 3, acidic		Cnn3
10406581	2.20762	Up	dihydrofolate reductase	BC005796	Dhfr	NM_010049	Mm.23695///Mm.23695///Mm.23695
10405971	2.01367	Up	NOL1/NOP2/Sun domain family 2	DQ490066	Nsun2	NM_145354	Mm.260009///Mm.260009///Mm.260009///Mm.260009///Mm.260009
10405753	5.90234	Up	malic enzyme 1, NADP(+)-dependent, cytosolic	BC094028	Me1		Mm.148155///Mm.378128///Mm.148155///Mm.378128
10405727	2.50329	Up	RIKEN cDNA 2410127L17 gene	BC092281	2410127L17Rik	NM_026120	Mm.306602///Mm.306602///Mm.306602
10405236	2.29133	Up	sideroflexin 1	AF325260	Sfxn1	NM_027324	Mm.134191///Mm.134191///Mm.134191
10404439	6.34934	Up	serine (or cysteine) peptidase inhibitor, clade B, member 9b	U96705	Serpinb9b	NM_011452	Mm.45371///Mm.45371///Mm.45371
10404429	2.94056	Up	serine (or cysteine) peptidase inhibitor, clade B, member 9	BC029900	Serpinb9	NM_009256	Mm.272569///Mm.272569///Mm.272569///Mm.272569
10404422	5.55464	Up	serine (or cysteine) peptidase inhibitor, clade B, member 6b	U96707	Serpinb6b	NM_011454	Mm.36526///Mm.36526///Mm.36526///Mm.36526
10404069	2.36817	Up	histone cluster 1, H1a	BC116820	Hist1h1a	NM_030609	Mm.377137///Mm.377137///Mm.377137
10404065	2.85544	Up	histone cluster 2, H3b | histone cluster 2, H3c1 | histone cluster 1, H3b | histone cluster 1, H3d | histone cluster 1, H3e | histone cluster 1, H3f | histone cluster 1, H3c | histone cluster 2, H3c2 | histone cluster 1, H3h | histone cluster 1, H3i | histone cluster 1, H3a | histone cluster 1, H3g	BC116383	Hist2h3b|Hist2h3c1|Hist1h3b|Hist1h3d|Hist1h3e|Hist1h3f|Hist1h3c|Hist2h3c2|Hist1h3h|Hist1h3i|Hist1h3a|Hist1h3g	NM_178215|NM_019469|NM_178203|NM_178204|NM_178205	Mm.383293///Mm.422680///Mm.342457///Mm.347699///Mm.261658///Mm.221389///Mm.261658///Mm.262517///Mm.342457///Mm.347699///Mm.358797///Mm.383293///Mm.422680///Mm.221301///Mm.261657///Mm.377874///Mm.390558///Mm.221389///Mm.261658///Mm.262517///Mm.342457///Mm.347699///Mm.358797///Mm.383293///Mm.422680///Mm.390558
10404049	2.80928	Up	histone cluster 2, H3b | histone cluster 2, H3c1 | histone cluster 1, H3d | histone cluster 1, H3b | histone cluster 1, H3e | histone cluster 1, H3f | histone cluster 1, H3c | histone cluster 2, H3c2 | histone cluster 1, H3h | histone cluster 1, H3i | histone cluster 1, H3a | histone cluster 1, H3g	BC116383	Hist2h3b|Hist2h3c1|Hist1h3d|Hist1h3b|Hist1h3e|Hist1h3f|Hist1h3c|Hist2h3c2|Hist1h3h|Hist1h3i|Hist1h3a|Hist1h3g	NM_178215|NM_019469|NM_178204|NM_178203|NM_178205	Mm.383293///Mm.422680///Mm.347699///Mm.342457///Mm.261658///Mm.221389///Mm.261658///Mm.262517///Mm.342457///Mm.347699///Mm.358797///Mm.383293///Mm.422680///Mm.221301///Mm.261657///Mm.377874///Mm.390558///Mm.221389///Mm.261658///Mm.262517///Mm.342457///Mm.347699///Mm.358797///Mm.383293///Mm.422680///Mm.390558
10404028	2.66186	Up	histone cluster 1, H3g | histone cluster 2, H3b | histone cluster 2, H3c1 | histone cluster 1, H3h | histone cluster 1, H3b | histone cluster 1, H3d | histone cluster 1, H3e | histone cluster 1, H3i | histone cluster 1, H3a | histone cluster 1, H3f | histone cluster 1, H3c | histone cluster 2, H3c2	BC125355|BC116383	Hist1h3g|Hist2h3b|Hist2h3c1|Hist1h3h|Hist1h3b|Hist1h3d|Hist1h3e|Hist1h3i|Hist1h3a|Hist1h3f|Hist1h3c|Hist2h3c2	NM_145073|NM_178215|NM_019469|NM_178206|NM_178203|NM_178204|NM_178205	Mm.261657///Mm.383293///Mm.422680///Mm.261657///Mm.377874///Mm.342457///Mm.347699///Mm.261658///Mm.221301///Mm.261657///Mm.377874///Mm.390558///Mm.221301///Mm.261657///Mm.377874///Mm.390558///Mm.221301///Mm.261657///Mm.377874///Mm.390558///Mm.221389///Mm.261658///Mm.262517///Mm.342457///Mm.347699///Mm.358797///Mm.383293///Mm.422680///Mm.390558
10403980	2.05876	Up	H2b histone family member | histone cluster 1, H2bj | histone cluster 1, H2bk | histone cluster 1, H2bl | histone cluster 1, H2bm | histone cluster 1, H2bn | similar to Hist1h2bj protein | histone cluster 1, H2bf	BC011440	LOC665622|Hist1h2bj|Hist1h2bk|Hist1h2bl|Hist1h2bm|Hist1h2bn|LOC100046213|Hist1h2bf	NM_178198|NM_175665|NM_178199|NM_178200|NM_178201|NM_178197|NM_178195	Mm.371766///Mm.257055///Mm.358955///Mm.377880///Mm.277425///Mm.261677///Mm.261677///Mm.261677///Mm.277425///Mm.277425///Mm.358955///Mm.277425///Mm.257055///Mm.261672///Mm.261677///Mm.377880///Mm.257055///Mm.261672///Mm.261677///Mm.377880///Mm.257055///Mm.261672///Mm.261677///Mm.377880
10403978	2.14549	Up	H2b histone family member | histone cluster 1, H2bk | histone cluster 1, H2bl | histone cluster 1, H2bj | histone cluster 1, H2bn | histone cluster 1, H2bm | histone cluster 1, H2bh | histone cluster 1, H2bf | similar to Hist1h2bj protein	BC011440	LOC665622|Hist1h2bk|Hist1h2bl|Hist1h2bj|Hist1h2bn|Hist1h2bm|Hist1h2bh|Hist1h2bf|LOC100046213	NM_175665|NM_178199|NM_178198|NM_178201|NM_178200|NM_178197|NM_178195	Mm.371766///Mm.358955///Mm.377880///Mm.257055///Mm.261677///Mm.277425///Mm.352273///Mm.261672///Mm.358955///Mm.277425///Mm.352273///Mm.358955///Mm.257055///Mm.261672///Mm.261677///Mm.377880///Mm.257055///Mm.261672///Mm.261677///Mm.377880
10403948	2.07047	Up	histone cluster 1, H2bn | histone cluster 1, H2bk | histone cluster 1, H2bl | histone cluster 1, H2bh | histone cluster 1, H2bj | histone cluster 1, H2bf | histone cluster 1, H2bm | histone cluster 1, H2bb | histone cluster 1, H2be | histone cluster 1, H2bg | H2b histone family, member A | H2b histone family member | histone cluster 1, H2bc | similar to Hist1h2bj protein		Hist1h2bn|Hist1h2bk|Hist1h2bl|Hist1h2bh|Hist1h2bj|Hist1h2bf|Hist1h2bm|Hist1h2bb|Hist1h2be|Hist1h2bg|RP23-38E20.1|LOC665622|Hist1h2bc|LOC100046213	NM_178201|NM_175665|NM_178199|NM_178197|NM_178198|NM_178195|NM_178200	Mm.261677///Mm.358955///Mm.377880///Mm.352273///Mm.257055///Mm.261672///Mm.277425///Mm.261673///Mm.261676///Mm.371766///Mm.390567///Mm.440391///Mm.352273///Mm.277425///Mm.358955///Mm.277425///Mm.257055///Mm.261672///Mm.261677///Mm.377880///Mm.257055///Mm.261672///Mm.261677///Mm.377880///Mm.257055///Mm.261672///Mm.261677///Mm.377880
10403941	2.68699	Up	histone cluster 2, H3b | histone cluster 2, H3c1 | histone cluster 1, H3h | histone cluster 1, H3b | histone cluster 1, H3d | histone cluster 1, H3e | histone cluster 1, H3i | histone cluster 1, H3a | histone cluster 1, H3g | histone cluster 1, H3f | histone cluster 1, H3c | histone cluster 2, H3c2	BC116383	Hist2h3b|Hist2h3c1|Hist1h3h|Hist1h3b|Hist1h3d|Hist1h3e|Hist1h3i|Hist1h3a|Hist1h3g|Hist1h3f|Hist1h3c|Hist2h3c2	NM_178215|NM_019469|NM_178206|NM_178203|NM_178204|NM_178205	Mm.383293///Mm.422680///Mm.377874///Mm.342457///Mm.347699///Mm.261658///Mm.221301///Mm.261657///Mm.377874///Mm.390558///Mm.221301///Mm.261657///Mm.377874///Mm.390558///Mm.221389///Mm.261658///Mm.262517///Mm.342457///Mm.347699///Mm.358797///Mm.383293///Mm.422680///Mm.390558
10403834	2.02305	Up	secreted frizzled-related protein 4	AF117709	Sfrp4	NM_016687	Mm.42095///Mm.42095///Mm.42095
10403727	2.88253	Up	GLI-Kruppel family member GLI3		Gli3	NM_008130	Mm.5098///Mm.5098
10403413	2.27617	Up	isopentenyl-diphosphate delta isomerase	BC110313	Idi1	NM_177960	Mm.29847///Mm.29847///Mm.29847
10403361	3.3389	Up	pitrilysin metallepetidase 1	AF513714	Pitrm1	NM_145131	Mm.41933///Mm.41933///Mm.41933///Mm.41933
10402783	3.19402	Up	AHNAK nucleoprotein 2		Ahnak2	NM_001033476	Mm.394208///Mm.394208
10402585	3.45996	Up	tryptophanyl-tRNA synthetase	BC046232	Wars	NM_011710	Mm.38433///Mm.38433///Mm.38433///Mm.38433
10402117	2.68393	Up	ribosomal protein S6 kinase, polypeptide 5	AY341873	Rps6ka5	NM_153587	Mm.220417///Mm.220417///Mm.220417///Mm.220417
10401667	2.09753	Up	RIKEN cDNA 0610007P14 gene	BC004591|AF270646	0610007P14Rik		Mm.143795///Mm.143795///Mm.143795
10401473	2.82383	Up	aldehyde dehydrogenase family 6, subfamily A1	BC033440	Aldh6a1	NM_134042	Mm.247510///Mm.247510///Mm.247510
10400795	2.43177	Up	salvador homolog 1 (Drosophila)	AJ292968	Sav1	NM_022028	Mm.390480///Mm.390480///Mm.390480
10400321	2.90219	Up	RIKEN cDNA 1110002B05 gene	BC022674	1110002B05Rik	NM_134054	Mm.292775///Mm.292775///Mm.292775
10400057	2.04551	Up	ADP-ribosylation factor-like 4A	BC029234	Arl4a	NM_001039515|NM_007487	Mm.12723///Mm.12723///Mm.12723///Mm.12723///Mm.12723
10400030	2.09937	Up	basic leucine zipper and W2 domains 2	BC013060	Bzw2	NM_025840	Mm.288669///Mm.288669///Mm.288669
10399636	2.1091	Up	MRT4, mRNA turnover 4, homolog (S. cerevisiae)	BC005734	Mrto4	NM_023536	Mm.296860///Mm.441201///Mm.296860///Mm.441201///Mm.296860///Mm.441201
10399465	2.74141	Up		BC005488	AW125753	NM_029007	Mm.227253///Mm.227253///Mm.227253
10399430	2.02606	Up	DEAD (Asp-Glu-Ala-Asp) box polypeptide 1	BC010624	Ddx1	NM_134040	Mm.251255///Mm.251255///Mm.251255
10399391	2.26034	Up	Gen homolog 1, endonuclease (Drosophila)	BC090653	Gen1	NM_177331	Mm.215295///Mm.215295///Mm.215295
10399087	2.18877	Up	non-SMC condensin II complex, subunit G2	BC076631	Ncapg2	NM_133762	Mm.21516///Mm.21516///Mm.21516
10398831	2.77087	Up	RIKEN cDNA 2610204M08 gene	DQ834374	2610204M08Rik	NM_198411	Mm.250193///Mm.250193///Mm.250193///Mm.250193
10398751	2.2347	Up	zinc finger, FYVE domain containing 21	BC132248	Zfyve21	NM_026752	Mm.390497///Mm.390497///Mm.390497
10398446	7.29625	Up	deiodinase, iodothyronine type III	BC106847	Dio3	NM_172119	Mm.154427///Mm.154427///Mm.154427
10398211	2.54018	Up	hedgehog interacting protein-like 1	BC113773	Hhipl1	NM_001044380	Mm.36423///Mm.36423///Mm.36423///Mm.36423
10398075	13.2296	Up	serine (or cysteine) peptidase inhibitor, clade A, member 3N	M64086	Serpina3n	NM_009252
10397975	2.14862	Up	DNA segment, Chr 12, ERATO Doi 647, expressed	BC128276	D12Ertd647e	NM_026790	Mm.2121///Mm.2121///Mm.2121///Mm.2121///Mm.2121///Mm.2121///Mm.2121
10397633	2.24579	Up	fibronectin leucine rich transmembrane protein 2	BC096471	Flrt2	NM_201518	Mm.341948///Mm.341948///Mm.341948///Mm.341948
10397606	8.89442	Up	thyroid stimulating hormone receptor	BC086691	Tshr	NM_011648|NM_001113404	Mm.173847///Mm.173847///Mm.173847///Mm.173847///Mm.173847
10397507	2.3488	Up	glutathione transferase zeta 1 (maleylacetoacetate isomerase)	BC031777	Gstz1	NM_010363	Mm.29652///Mm.29652///Mm.29652
10397148	2.26054	Up	acyl-CoA thioesterase 1	BC028261	Acot1	NM_012006	Mm.1978///Mm.1978///Mm.1978
10397145	2.08521	Up	acyl-CoA thioesterase 2	BC064469	Acot2	NM_134188
10397054	2.07239	Up	WD repeat domain 21	BC003284	Wdr21	NM_030246	Mm.38238///Mm.38238///Mm.38238
10397002	2.07867	Up	signal-induced proliferation-associated 1 like 1	BC058681	Sipa1l1	NM_172579	Mm.261333///Mm.261333///Mm.261333///Mm.261333///Mm.261333
10396936	3.15697	Up	SPARC related modular calcium binding 1	BC031804	Smoc1	NM_022316	Mm.273295///Mm.273295///Mm.273295///Mm.273295
10396610	3.9087	Up	methylenetetrahydrofolate dehydrogenase (NADP+ dependent), methenyltetrahydrofolate cyclohydrolase, formyltetrahydrofolate synthase	AK129012	Mthfd1	NM_138745	Mm.29584///Mm.29584///Mm.29584
10395659	2.56303	Up	coagulation factor C homolog (Limulus polyphemus)	BC045137	Coch	NM_007728	Mm.21325///Mm.21325///Mm.21325
[truncated: 225 more rows]
